# Supplementary material for: An empirical evaluation of sampling methods for the classification of imbalanced data
Source: PLoS One. 2022 Jul 28;17(7):e0271260. doi: 10.1371/journal.pone.0271260 (PMC9333262; doi:10.1371/journal.pone.0271260)
Supplement: S1 Dataset — (XLSX) [file pone.0271260.s001.xlsx]

## Sheet: 1. Creditcard
	Algorithm	Iteration	Fold	Without Sampling	O_Random	O_SMOTE	O_Border	U_Random	U_Condensed	U_NearMiss	SMOTETomek
	AdaBoost	1	1	{'n_estimators': 500, 'learning_rate': 0.01}	{'n_estimators': 500, 'learning_rate': 0.01}	{'n_estimators': 500, 'learning_rate': 0.01}	{'n_estimators': 500, 'learning_rate': 0.01}	{'n_estimators': 500, 'learning_rate': 0.01}	{'n_estimators': 500, 'learning_rate': 0.01}	{'n_estimators': 500, 'learning_rate': 0.01}	{'n_estimators': 500, 'learning_rate': 0.01}
	AdaBoost	1	2	{'n_estimators': 500, 'learning_rate': 0.01}	{'n_estimators': 500, 'learning_rate': 0.01}	{'n_estimators': 500, 'learning_rate': 0.01}	{'n_estimators': 500, 'learning_rate': 0.01}	{'n_estimators': 500, 'learning_rate': 0.01}	{'n_estimators': 50, 'learning_rate': 1.0}	{'n_estimators': 500, 'learning_rate': 0.01}	{'n_estimators': 500, 'learning_rate': 0.01}
	AdaBoost	2	1	{'n_estimators': 50, 'learning_rate': 1.0}	{'n_estimators': 500, 'learning_rate': 0.01}	{'n_estimators': 500, 'learning_rate': 0.01}	{'n_estimators': 500, 'learning_rate': 0.01}	{'n_estimators': 500, 'learning_rate': 0.01}	{'n_estimators': 500, 'learning_rate': 0.01}	{'n_estimators': 50, 'learning_rate': 1.0}	{'n_estimators': 500, 'learning_rate': 0.01}
	AdaBoost	2	2	{'n_estimators': 50, 'learning_rate': 1.0}	{'n_estimators': 500, 'learning_rate': 0.01}	{'n_estimators': 500, 'learning_rate': 0.01}	{'n_estimators': 500, 'learning_rate': 0.01}	{'n_estimators': 500, 'learning_rate': 0.01}	{'n_estimators': 500, 'learning_rate': 0.01}	{'n_estimators': 500, 'learning_rate': 0.01}	{'n_estimators': 500, 'learning_rate': 0.01}
	AdaBoost	3	1	{'n_estimators': 500, 'learning_rate': 0.01}	{'n_estimators': 500, 'learning_rate': 0.01}	{'n_estimators': 500, 'learning_rate': 0.01}	{'n_estimators': 500, 'learning_rate': 0.01}	{'n_estimators': 500, 'learning_rate': 0.01}	{'n_estimators': 500, 'learning_rate': 0.01}	{'n_estimators': 500, 'learning_rate': 0.01}	{'n_estimators': 500, 'learning_rate': 0.01}
	AdaBoost	3	2	{'n_estimators': 500, 'learning_rate': 0.01}	{'n_estimators': 500, 'learning_rate': 0.01}	{'n_estimators': 500, 'learning_rate': 0.01}	{'n_estimators': 500, 'learning_rate': 0.01}	{'n_estimators': 500, 'learning_rate': 0.01}	{'n_estimators': 500, 'learning_rate': 0.01}	{'n_estimators': 50, 'learning_rate': 1.0}	{'n_estimators': 500, 'learning_rate': 0.01}
	AdaBoost	4	1	{'n_estimators': 500, 'learning_rate': 0.01}	{'n_estimators': 500, 'learning_rate': 0.01}	{'n_estimators': 500, 'learning_rate': 0.01}	{'n_estimators': 500, 'learning_rate': 0.01}	{'n_estimators': 500, 'learning_rate': 0.01}	{'n_estimators': 500, 'learning_rate': 0.01}	{'n_estimators': 50, 'learning_rate': 1.0}	{'n_estimators': 500, 'learning_rate': 0.01}
	AdaBoost	4	2	{'n_estimators': 500, 'learning_rate': 0.01}	{'n_estimators': 500, 'learning_rate': 0.01}	{'n_estimators': 500, 'learning_rate': 0.01}	{'n_estimators': 500, 'learning_rate': 0.01}	{'n_estimators': 500, 'learning_rate': 0.01}	{'n_estimators': 500, 'learning_rate': 0.01}	{'n_estimators': 500, 'learning_rate': 0.01}	{'n_estimators': 500, 'learning_rate': 0.01}
	AdaBoost	5	1	{'n_estimators': 50, 'learning_rate': 1.0}	{'n_estimators': 500, 'learning_rate': 0.01}	{'n_estimators': 500, 'learning_rate': 0.01}	{'n_estimators': 500, 'learning_rate': 0.01}	{'n_estimators': 500, 'learning_rate': 0.01}	{'n_estimators': 500, 'learning_rate': 0.01}	{'n_estimators': 500, 'learning_rate': 0.01}	{'n_estimators': 500, 'learning_rate': 0.01}
	AdaBoost	5	2	{'n_estimators': 500, 'learning_rate': 0.01}	{'n_estimators': 500, 'learning_rate': 0.01}	{'n_estimators': 500, 'learning_rate': 0.01}	{'n_estimators': 500, 'learning_rate': 0.01}	{'n_estimators': 500, 'learning_rate': 0.01}	{'n_estimators': 500, 'learning_rate': 0.01}	{'n_estimators': 50, 'learning_rate': 1.0}	{'n_estimators': 500, 'learning_rate': 0.01}
	XGBoost	1	1	{'subsample': 0.6, 'min_child_weight': 10, 'max_depth': 6, 'gamma': 0.5, 'colsample_bytree': 1.0}	{'subsample': 0.6, 'min_child_weight': 5, 'max_depth': 5, 'gamma': 0, 'colsample_bytree': 0.8}	{'subsample': 0.8, 'min_child_weight': 10, 'max_depth': 6, 'gamma': 0, 'colsample_bytree': 0.6}	{'subsample': 0.6, 'min_child_weight': 5, 'max_depth': 5, 'gamma': 0, 'colsample_bytree': 0.8}	{'subsample': 0.8, 'min_child_weight': 10, 'max_depth': 6, 'gamma': 0, 'colsample_bytree': 0.6}	{'subsample': 0.6, 'min_child_weight': 5, 'max_depth': 5, 'gamma': 0, 'colsample_bytree': 0.8}	{'subsample': 0.6, 'min_child_weight': 5, 'max_depth': 5, 'gamma': 0, 'colsample_bytree': 0.8}	{'subsample': 0.8, 'min_child_weight': 10, 'max_depth': 6, 'gamma': 0, 'colsample_bytree': 0.6}
	XGBoost	1	2	{'subsample': 1.0, 'min_child_weight': 1, 'max_depth': 6, 'gamma': 0, 'colsample_bytree': 1.0}	{'subsample': 0.6, 'min_child_weight': 10, 'max_depth': 6, 'gamma': 0.5, 'colsample_bytree': 1.0}	{'subsample': 0.8, 'min_child_weight': 10, 'max_depth': 6, 'gamma': 0, 'colsample_bytree': 0.6}	{'subsample': 1.0, 'min_child_weight': 1, 'max_depth': 6, 'gamma': 0, 'colsample_bytree': 1.0}	{'subsample': 0.8, 'min_child_weight': 10, 'max_depth': 6, 'gamma': 0, 'colsample_bytree': 0.6}	{'subsample': 0.6, 'min_child_weight': 5, 'max_depth': 5, 'gamma': 0, 'colsample_bytree': 0.8}	{'subsample': 1.0, 'min_child_weight': 1, 'max_depth': 6, 'gamma': 0, 'colsample_bytree': 1.0}	{'subsample': 0.8, 'min_child_weight': 10, 'max_depth': 6, 'gamma': 0, 'colsample_bytree': 0.6}
	XGBoost	2	1	{'subsample': 1.0, 'min_child_weight': 1, 'max_depth': 6, 'gamma': 0, 'colsample_bytree': 1.0}	{'subsample': 0.6, 'min_child_weight': 5, 'max_depth': 5, 'gamma': 0, 'colsample_bytree': 0.8}	{'subsample': 0.6, 'min_child_weight': 5, 'max_depth': 5, 'gamma': 0, 'colsample_bytree': 0.8}	{'subsample': 0.8, 'min_child_weight': 10, 'max_depth': 6, 'gamma': 0, 'colsample_bytree': 0.6}	{'subsample': 0.8, 'min_child_weight': 10, 'max_depth': 6, 'gamma': 0, 'colsample_bytree': 0.6}	{'subsample': 0.8, 'min_child_weight': 10, 'max_depth': 6, 'gamma': 0, 'colsample_bytree': 0.6}	{'subsample': 0.6, 'min_child_weight': 5, 'max_depth': 5, 'gamma': 0, 'colsample_bytree': 0.8}	{'subsample': 0.6, 'min_child_weight': 5, 'max_depth': 5, 'gamma': 0, 'colsample_bytree': 0.8}
	XGBoost	2	2	{'subsample': 1.0, 'min_child_weight': 1, 'max_depth': 6, 'gamma': 0, 'colsample_bytree': 1.0}	{'subsample': 0.6, 'min_child_weight': 5, 'max_depth': 5, 'gamma': 0, 'colsample_bytree': 0.8}	{'subsample': 0.6, 'min_child_weight': 5, 'max_depth': 5, 'gamma': 0, 'colsample_bytree': 0.8}	{'subsample': 0.6, 'min_child_weight': 5, 'max_depth': 5, 'gamma': 0, 'colsample_bytree': 0.8}	{'subsample': 0.8, 'min_child_weight': 10, 'max_depth': 6, 'gamma': 0, 'colsample_bytree': 0.6}	{'subsample': 0.6, 'min_child_weight': 5, 'max_depth': 5, 'gamma': 0, 'colsample_bytree': 0.8}	{'subsample': 0.6, 'min_child_weight': 5, 'max_depth': 5, 'gamma': 0, 'colsample_bytree': 0.8}	{'subsample': 0.6, 'min_child_weight': 5, 'max_depth': 5, 'gamma': 0, 'colsample_bytree': 0.8}
	XGBoost	3	1	{'subsample': 1.0, 'min_child_weight': 1, 'max_depth': 6, 'gamma': 0, 'colsample_bytree': 1.0}	{'subsample': 0.6, 'min_child_weight': 5, 'max_depth': 5, 'gamma': 0, 'colsample_bytree': 0.8}	{'subsample': 0.8, 'min_child_weight': 10, 'max_depth': 6, 'gamma': 0, 'colsample_bytree': 0.6}	{'subsample': 0.6, 'min_child_weight': 5, 'max_depth': 5, 'gamma': 0, 'colsample_bytree': 0.8}	{'subsample': 0.6, 'min_child_weight': 10, 'max_depth': 6, 'gamma': 0.5, 'colsample_bytree': 1.0}	{'subsample': 0.8, 'min_child_weight': 10, 'max_depth': 6, 'gamma': 0, 'colsample_bytree': 0.6}	{'subsample': 1.0, 'min_child_weight': 1, 'max_depth': 6, 'gamma': 0, 'colsample_bytree': 1.0}	{'subsample': 0.8, 'min_child_weight': 10, 'max_depth': 6, 'gamma': 0, 'colsample_bytree': 0.6}
	XGBoost	3	2	{'subsample': 0.6, 'min_child_weight': 5, 'max_depth': 5, 'gamma': 0, 'colsample_bytree': 0.8}	{'subsample': 0.6, 'min_child_weight': 5, 'max_depth': 5, 'gamma': 0, 'colsample_bytree': 0.8}	{'subsample': 0.6, 'min_child_weight': 5, 'max_depth': 5, 'gamma': 0, 'colsample_bytree': 0.8}	{'subsample': 0.8, 'min_child_weight': 10, 'max_depth': 6, 'gamma': 0, 'colsample_bytree': 0.6}	{'subsample': 0.8, 'min_child_weight': 10, 'max_depth': 6, 'gamma': 0, 'colsample_bytree': 0.6}	{'subsample': 0.8, 'min_child_weight': 10, 'max_depth': 6, 'gamma': 0, 'colsample_bytree': 0.6}	{'subsample': 0.8, 'min_child_weight': 10, 'max_depth': 6, 'gamma': 0, 'colsample_bytree': 0.6}	{'subsample': 0.6, 'min_child_weight': 5, 'max_depth': 5, 'gamma': 0, 'colsample_bytree': 0.8}
	XGBoost	4	1	{'subsample': 0.6, 'min_child_weight': 10, 'max_depth': 6, 'gamma': 0.5, 'colsample_bytree': 1.0}	{'subsample': 0.8, 'min_child_weight': 10, 'max_depth': 6, 'gamma': 0, 'colsample_bytree': 0.6}	{'subsample': 0.8, 'min_child_weight': 10, 'max_depth': 6, 'gamma': 0, 'colsample_bytree': 0.6}	{'subsample': 0.6, 'min_child_weight': 5, 'max_depth': 5, 'gamma': 0, 'colsample_bytree': 0.8}	{'subsample': 0.6, 'min_child_weight': 10, 'max_depth': 6, 'gamma': 0.5, 'colsample_bytree': 1.0}	{'subsample': 0.8, 'min_child_weight': 10, 'max_depth': 6, 'gamma': 0, 'colsample_bytree': 0.6}	{'subsample': 1.0, 'min_child_weight': 1, 'max_depth': 6, 'gamma': 0, 'colsample_bytree': 1.0}	{'subsample': 0.8, 'min_child_weight': 10, 'max_depth': 6, 'gamma': 0, 'colsample_bytree': 0.6}
	XGBoost	4	2	{'subsample': 0.6, 'min_child_weight': 10, 'max_depth': 6, 'gamma': 0.5, 'colsample_bytree': 1.0}	{'subsample': 0.6, 'min_child_weight': 5, 'max_depth': 5, 'gamma': 0, 'colsample_bytree': 0.8}	{'subsample': 0.6, 'min_child_weight': 5, 'max_depth': 5, 'gamma': 0, 'colsample_bytree': 0.8}	{'subsample': 0.6, 'min_child_weight': 5, 'max_depth': 5, 'gamma': 0, 'colsample_bytree': 0.8}	{'subsample': 0.8, 'min_child_weight': 10, 'max_depth': 6, 'gamma': 0, 'colsample_bytree': 0.6}	{'subsample': 0.8, 'min_child_weight': 10, 'max_depth': 6, 'gamma': 0, 'colsample_bytree': 0.6}	{'subsample': 0.8, 'min_child_weight': 10, 'max_depth': 6, 'gamma': 0, 'colsample_bytree': 0.6}	{'subsample': 0.6, 'min_child_weight': 5, 'max_depth': 5, 'gamma': 0, 'colsample_bytree': 0.8}
	XGBoost	5	1	{'subsample': 1.0, 'min_child_weight': 1, 'max_depth': 6, 'gamma': 0, 'colsample_bytree': 1.0}	{'subsample': 0.6, 'min_child_weight': 5, 'max_depth': 5, 'gamma': 0, 'colsample_bytree': 0.8}	{'subsample': 0.6, 'min_child_weight': 5, 'max_depth': 5, 'gamma': 0, 'colsample_bytree': 0.8}	{'subsample': 0.6, 'min_child_weight': 5, 'max_depth': 5, 'gamma': 0, 'colsample_bytree': 0.8}	{'subsample': 0.6, 'min_child_weight': 10, 'max_depth': 6, 'gamma': 0.5, 'colsample_bytree': 1.0}	{'subsample': 0.8, 'min_child_weight': 10, 'max_depth': 6, 'gamma': 0, 'colsample_bytree': 0.6}	{'subsample': 1.0, 'min_child_weight': 1, 'max_depth': 6, 'gamma': 0, 'colsample_bytree': 1.0}	{'subsample': 0.6, 'min_child_weight': 5, 'max_depth': 5, 'gamma': 0, 'colsample_bytree': 0.8}
	XGBoost	5	2	{'subsample': 0.8, 'min_child_weight': 10, 'max_depth': 6, 'gamma': 0, 'colsample_bytree': 0.6}	{'subsample': 0.6, 'min_child_weight': 5, 'max_depth': 5, 'gamma': 0, 'colsample_bytree': 0.8}	{'subsample': 0.6, 'min_child_weight': 5, 'max_depth': 5, 'gamma': 0, 'colsample_bytree': 0.8}	{'subsample': 0.6, 'min_child_weight': 5, 'max_depth': 5, 'gamma': 0, 'colsample_bytree': 0.8}	{'subsample': 0.6, 'min_child_weight': 5, 'max_depth': 5, 'gamma': 0, 'colsample_bytree': 0.8}	{'subsample': 1.0, 'min_child_weight': 1, 'max_depth': 6, 'gamma': 0, 'colsample_bytree': 1.0}	{'subsample': 1.0, 'min_child_weight': 1, 'max_depth': 6, 'gamma': 0, 'colsample_bytree': 1.0}	{'subsample': 0.6, 'min_child_weight': 5, 'max_depth': 5, 'gamma': 0, 'colsample_bytree': 0.8}
	RF	1	1	{'n_estimators': 500}	{'n_estimators': 3000}	{'n_estimators': 1000}	{'n_estimators': 3000}	{'n_estimators': 3000}	{'n_estimators': 3000}	{'n_estimators': 1000}	{'n_estimators': 1000}
	RF	1	2	{'n_estimators': 3000}	{'n_estimators': 100}	{'n_estimators': 3000}	{'n_estimators': 3000}	{'n_estimators': 500}	{'n_estimators': 1000}	{'n_estimators': 1000}	{'n_estimators': 3000}
	RF	2	1	{'n_estimators': 1000}	{'n_estimators': 1000}	{'n_estimators': 3000}	{'n_estimators': 1000}	{'n_estimators': 500}	{'n_estimators': 3000}	{'n_estimators': 100}	{'n_estimators': 3000}
	RF	2	2	{'n_estimators': 3000}	{'n_estimators': 1000}	{'n_estimators': 3000}	{'n_estimators': 3000}	{'n_estimators': 500}	{'n_estimators': 500}	{'n_estimators': 3000}	{'n_estimators': 3000}
	RF	3	1	{'n_estimators': 100}	{'n_estimators': 100}	{'n_estimators': 500}	{'n_estimators': 3000}	{'n_estimators': 500}	{'n_estimators': 500}	{'n_estimators': 1000}	{'n_estimators': 500}
	RF	3	2	{'n_estimators': 3000}	{'n_estimators': 1000}	{'n_estimators': 500}	{'n_estimators': 3000}	{'n_estimators': 500}	{'n_estimators': 3000}	{'n_estimators': 1000}	{'n_estimators': 500}
	RF	4	1	{'n_estimators': 3000}	{'n_estimators': 100}	{'n_estimators': 1000}	{'n_estimators': 500}	{'n_estimators': 100}	{'n_estimators': 100}	{'n_estimators': 500}	{'n_estimators': 1000}
	RF	4	2	{'n_estimators': 3000}	{'n_estimators': 100}	{'n_estimators': 1000}	{'n_estimators': 3000}	{'n_estimators': 500}	{'n_estimators': 100}	{'n_estimators': 100}	{'n_estimators': 1000}
	RF	5	1	{'n_estimators': 3000}	{'n_estimators': 100}	{'n_estimators': 3000}	{'n_estimators': 3000}	{'n_estimators': 3000}	{'n_estimators': 3000}	{'n_estimators': 500}	{'n_estimators': 3000}
	RF	5	2	{'n_estimators': 3000}	{'n_estimators': 100}	{'n_estimators': 500}	{'n_estimators': 100}	{'n_estimators': 3000}	{'n_estimators': 1000}	{'n_estimators': 500}	{'n_estimators': 500}
	SVM	1	1	{'gamma': 0.01, 'C': 1}	{'gamma': 1.0, 'C': 10}	{'gamma': 1.0, 'C': 10}	{'gamma': 1.0, 'C': 10}	{'gamma': 0.01, 'C': 1}	{'gamma': 0.01, 'C': 0.1}	{'gamma': 0.01, 'C': 1}	{'gamma': 1.0, 'C': 10}
	SVM	1	2	{'gamma': 0.01, 'C': 0.1}	{'gamma': 1.0, 'C': 10}	{'gamma': 1.0, 'C': 10}	{'gamma': 1.0, 'C': 10}	{'gamma': 0.01, 'C': 1}	{'gamma': 0.01, 'C': 1}	{'gamma': 0.01, 'C': 1}	{'gamma': 1.0, 'C': 10}
	SVM	2	1	{'gamma': 0.01, 'C': 1}	{'gamma': 1.0, 'C': 10}	{'gamma': 1.0, 'C': 10}	{'gamma': 1.0, 'C': 10}	{'gamma': 0.01, 'C': 1}	{'gamma': 0.01, 'C': 0.1}	{'gamma': 0.01, 'C': 1}	{'gamma': 1.0, 'C': 10}
	SVM	2	2	{'gamma': 0.01, 'C': 0.1}	{'gamma': 1.0, 'C': 10}	{'gamma': 1.0, 'C': 10}	{'gamma': 1.0, 'C': 10}	{'gamma': 0.01, 'C': 1}	{'gamma': 0.01, 'C': 0.1}	{'gamma': 0.01, 'C': 1}	{'gamma': 1.0, 'C': 10}
	SVM	3	1	{'gamma': 0.01, 'C': 1}	{'gamma': 1.0, 'C': 10}	{'gamma': 1.0, 'C': 10}	{'gamma': 1.0, 'C': 10}	{'gamma': 0.01, 'C': 1}	{'gamma': 0.01, 'C': 0.1}	{'gamma': 0.01, 'C': 1}	{'gamma': 1.0, 'C': 10}
	SVM	3	2	{'gamma': 0.01, 'C': 0.1}	{'gamma': 1.0, 'C': 10}	{'gamma': 1.0, 'C': 10}	{'gamma': 1.0, 'C': 10}	{'gamma': 0.01, 'C': 1}	{'gamma': 0.01, 'C': 1}	{'gamma': 0.01, 'C': 1}	{'gamma': 1.0, 'C': 10}
	SVM	4	1	{'gamma': 0.01, 'C': 1}	{'gamma': 1.0, 'C': 10}	{'gamma': 1.0, 'C': 10}	{'gamma': 1.0, 'C': 10}	{'gamma': 0.01, 'C': 1}	{'gamma': 0.01, 'C': 0.1}	{'gamma': 0.01, 'C': 1}	{'gamma': 1.0, 'C': 10}
	SVM	4	2	{'gamma': 0.01, 'C': 1}	{'gamma': 1.0, 'C': 10}	{'gamma': 1.0, 'C': 10}	{'gamma': 1.0, 'C': 10}	{'gamma': 0.01, 'C': 0.1}	{'gamma': 0.01, 'C': 0.1}	{'gamma': 0.01, 'C': 1}	{'gamma': 1.0, 'C': 10}
	SVM	5	1	{'gamma': 0.01, 'C': 0.1}	{'gamma': 1.0, 'C': 10}	{'gamma': 1.0, 'C': 10}	{'gamma': 1.0, 'C': 10}	{'gamma': 0.01, 'C': 1}	{'gamma': 0.01, 'C': 1}	{'gamma': 0.01, 'C': 1}	{'gamma': 1.0, 'C': 10}
	SVM	5	2	{'gamma': 0.01, 'C': 1}	{'gamma': 1.0, 'C': 10}	{'gamma': 1.0, 'C': 10}	{'gamma': 1.0, 'C': 10}	{'gamma': 0.01, 'C': 1}	{'gamma': 0.01, 'C': 0.1}	{'gamma': 0.01, 'C': 1}	{'gamma': 1.0, 'C': 10}
	LDA	1	1
	LDA	1	2
	LDA	2	1
	LDA	2	2
	LDA	3	1
	LDA	3	2
	LDA	4	1
	LDA	4	2
	LDA	5	1
	LDA	5	2
	Lasso	1	1	{'C': 0.1}	{'C': 10}	{'C': 10}	{'C': 10}	{'C': 0.1}	{'C': 0.1}	{'C': 10}	{'C': 10}
	Lasso	1	2	{'C': 0.1}	{'C': 1}	{'C': 1}	{'C': 1}	{'C': 0.1}	{'C': 0.1}	{'C': 1}	{'C': 1}
	Lasso	2	1	{'C': 1}	{'C': 10}	{'C': 1}	{'C': 1}	{'C': 0.1}	{'C': 0.1}	{'C': 10}	{'C': 1}
	Lasso	2	2	{'C': 0.1}	{'C': 10}	{'C': 10}	{'C': 10}	{'C': 0.1}	{'C': 0.1}	{'C': 1}	{'C': 10}
	Lasso	3	1	{'C': 1}	{'C': 10}	{'C': 10}	{'C': 10}	{'C': 0.1}	{'C': 0.1}	{'C': 10}	{'C': 10}
	Lasso	3	2	{'C': 0.1}	{'C': 1}	{'C': 0.1}	{'C': 10}	{'C': 0.1}	{'C': 0.1}	{'C': 0.1}	{'C': 0.1}
	Lasso	4	1	{'C': 0.1}	{'C': 10}	{'C': 10}	{'C': 10}	{'C': 0.1}	{'C': 0.1}	{'C': 10}	{'C': 10}
	Lasso	4	2	{'C': 0.1}	{'C': 10}	{'C': 10}	{'C': 10}	{'C': 0.1}	{'C': 0.1}	{'C': 0.1}	{'C': 10}
	Lasso	5	1	{'C': 0.1}	{'C': 10}	{'C': 10}	{'C': 10}	{'C': 0.1}	{'C': 0.1}	{'C': 1}	{'C': 10}
	Lasso	5	2	{'C': 10}	{'C': 1}	{'C': 1}	{'C': 10}	{'C': 0.1}	{'C': 0.1}	{'C': 10}	{'C': 1}
	Ridge	1	1	{'C': 0.1}	{'C': 10}	{'C': 10}	{'C': 10}	{'C': 0.1}	{'C': 0.1}	{'C': 10}	{'C': 10}
	Ridge	1	2	{'C': 0.1}	{'C': 10}	{'C': 10}	{'C': 0.1}	{'C': 0.1}	{'C': 0.1}	{'C': 10}	{'C': 10}
	Ridge	2	1	{'C': 0.1}	{'C': 10}	{'C': 10}	{'C': 0.1}	{'C': 0.1}	{'C': 0.1}	{'C': 10}	{'C': 10}
	Ridge	2	2	{'C': 0.1}	{'C': 10}	{'C': 10}	{'C': 10}	{'C': 0.1}	{'C': 0.1}	{'C': 1}	{'C': 10}
	Ridge	3	1	{'C': 0.1}	{'C': 10}	{'C': 10}	{'C': 10}	{'C': 0.1}	{'C': 0.1}	{'C': 1}	{'C': 10}
	Ridge	3	2	{'C': 0.1}	{'C': 10}	{'C': 10}	{'C': 0.1}	{'C': 0.1}	{'C': 0.1}	{'C': 10}	{'C': 10}
	Ridge	4	1	{'C': 0.1}	{'C': 10}	{'C': 10}	{'C': 1}	{'C': 0.1}	{'C': 0.1}	{'C': 10}	{'C': 10}
	Ridge	4	2	{'C': 0.1}	{'C': 10}	{'C': 10}	{'C': 0.1}	{'C': 10}	{'C': 0.1}	{'C': 10}	{'C': 10}
	Ridge	5	1	{'C': 10}	{'C': 10}	{'C': 10}	{'C': 10}	{'C': 0.1}	{'C': 0.1}	{'C': 1}	{'C': 10}
	Ridge	5	2	{'C': 0.1}	{'C': 10}	{'C': 10}	{'C': 10}	{'C': 0.1}	{'C': 0.1}	{'C': 10}	{'C': 10}
	ElasticNet	1	1	{'C': 0.1}	{'C': 10}	{'C': 10}	{'C': 10}	{'C': 0.1}	{'C': 0.1}	{'C': 10}	{'C': 10}
	ElasticNet	1	2	{'C': 0.1}	{'C': 0.1}	{'C': 1}	{'C': 0.1}	{'C': 0.1}	{'C': 0.1}	{'C': 1}	{'C': 1}
	ElasticNet	2	1	{'C': 1}	{'C': 10}	{'C': 0.1}	{'C': 0.1}	{'C': 0.1}	{'C': 0.1}	{'C': 1}	{'C': 0.1}
	ElasticNet	2	2	{'C': 0.1}	{'C': 10}	{'C': 10}	{'C': 10}	{'C': 0.1}	{'C': 0.1}	{'C': 0.1}	{'C': 10}
	ElasticNet	3	1	{'C': 0.1}	{'C': 10}	{'C': 10}	{'C': 10}	{'C': 0.1}	{'C': 0.1}	{'C': 10}	{'C': 10}
	ElasticNet	3	2	{'C': 10}	{'C': 1}	{'C': 0.1}	{'C': 0.1}	{'C': 0.1}	{'C': 0.1}	{'C': 1}	{'C': 0.1}
	ElasticNet	4	1	{'C': 0.1}	{'C': 10}	{'C': 10}	{'C': 10}	{'C': 0.1}	{'C': 0.1}	{'C': 1}	{'C': 10}
	ElasticNet	4	2	{'C': 0.1}	{'C': 10}	{'C': 10}	{'C': 10}	{'C': 0.1}	{'C': 0.1}	{'C': 0.1}	{'C': 10}
	ElasticNet	5	1	{'C': 0.1}	{'C': 10}	{'C': 10}	{'C': 10}	{'C': 0.1}	{'C': 0.1}	{'C': 1}	{'C': 10}
	ElasticNet	5	2	{'C': 0.1}	{'C': 0.1}	{'C': 1}	{'C': 10}	{'C': 0.1}	{'C': 0.1}	{'C': 10}	{'C': 1}

## Sheet: 2. Shuttle3
	Algorithm	Iteration	Fold	Without Sampling	O_Random	O_SMOTE	O_Border	U_Random	U_Condensed	U_NearMiss	SMOTETomek
	AdaBoost	1	1	{'n_estimators': 50, 'learning_rate': 1.0}	{'n_estimators': 500, 'learning_rate': 0.01}	{'n_estimators': 50, 'learning_rate': 1.0}	{'n_estimators': 50, 'learning_rate': 1.0}	{'n_estimators': 10, 'learning_rate': 1.0}	{'n_estimators': 10, 'learning_rate': 1.0}	{'n_estimators': 500, 'learning_rate': 0.01}	{'n_estimators': 50, 'learning_rate': 1.0}
	AdaBoost	1	2	{'n_estimators': 50, 'learning_rate': 1.0}	{'n_estimators': 50, 'learning_rate': 1.0}	{'n_estimators': 50, 'learning_rate': 1.0}	{'n_estimators': 500, 'learning_rate': 0.01}	{'n_estimators': 10, 'learning_rate': 1.0}	{'algorithm': 'SAMME.R', 'base_estimator': None, 'learning_rate': 1.0, 'n_estimators': 50, 'random_state': 12345}	{'n_estimators': 500, 'learning_rate': 0.01}	{'n_estimators': 50, 'learning_rate': 1.0}
	AdaBoost	2	1	{'n_estimators': 50, 'learning_rate': 1.0}	{'n_estimators': 10, 'learning_rate': 1.0}	{'n_estimators': 10, 'learning_rate': 1.0}	{'n_estimators': 10, 'learning_rate': 1.0}	{'n_estimators': 10, 'learning_rate': 1.0}	{'n_estimators': 10, 'learning_rate': 1.0}	{'n_estimators': 10, 'learning_rate': 1.0}	{'n_estimators': 10, 'learning_rate': 1.0}
	AdaBoost	2	2	{'n_estimators': 10, 'learning_rate': 1.0}	{'n_estimators': 10, 'learning_rate': 1.0}	{'n_estimators': 10, 'learning_rate': 1.0}	{'n_estimators': 50, 'learning_rate': 1.0}	{'n_estimators': 10, 'learning_rate': 1.0}	{'n_estimators': 10, 'learning_rate': 1.0}	{'n_estimators': 10, 'learning_rate': 1.0}	{'n_estimators': 10, 'learning_rate': 1.0}
	AdaBoost	3	1	{'n_estimators': 10, 'learning_rate': 1.0}	{'n_estimators': 10, 'learning_rate': 1.0}	{'n_estimators': 50, 'learning_rate': 1.0}	{'n_estimators': 500, 'learning_rate': 0.01}	{'n_estimators': 10, 'learning_rate': 1.0}	{'n_estimators': 50, 'learning_rate': 1.0}	{'n_estimators': 500, 'learning_rate': 0.01}	{'n_estimators': 50, 'learning_rate': 1.0}
	AdaBoost	3	2	{'n_estimators': 10, 'learning_rate': 1.0}	{'n_estimators': 500, 'learning_rate': 0.01}	{'n_estimators': 10, 'learning_rate': 1.0}	{'n_estimators': 10, 'learning_rate': 1.0}	{'n_estimators': 10, 'learning_rate': 1.0}	{'n_estimators': 10, 'learning_rate': 1.0}	{'n_estimators': 500, 'learning_rate': 0.01}	{'n_estimators': 10, 'learning_rate': 1.0}
	AdaBoost	4	1	{'n_estimators': 50, 'learning_rate': 1.0}	{'n_estimators': 50, 'learning_rate': 1.0}	{'n_estimators': 50, 'learning_rate': 1.0}	{'n_estimators': 500, 'learning_rate': 0.01}	{'n_estimators': 10, 'learning_rate': 1.0}	{'n_estimators': 50, 'learning_rate': 1.0}	{'n_estimators': 500, 'learning_rate': 0.01}	{'n_estimators': 50, 'learning_rate': 1.0}
	AdaBoost	4	2	{'n_estimators': 50, 'learning_rate': 1.0}	{'n_estimators': 50, 'learning_rate': 1.0}	{'n_estimators': 50, 'learning_rate': 1.0}	{'n_estimators': 50, 'learning_rate': 1.0}	{'n_estimators': 10, 'learning_rate': 1.0}	{'n_estimators': 10, 'learning_rate': 1.0}	{'n_estimators': 10, 'learning_rate': 1.0}	{'n_estimators': 50, 'learning_rate': 1.0}
	AdaBoost	5	1	{'n_estimators': 10, 'learning_rate': 1.0}	{'n_estimators': 10, 'learning_rate': 1.0}	{'n_estimators': 10, 'learning_rate': 1.0}	{'n_estimators': 500, 'learning_rate': 0.01}	{'n_estimators': 10, 'learning_rate': 1.0}	{'n_estimators': 500, 'learning_rate': 0.01}	{'n_estimators': 10, 'learning_rate': 1.0}	{'n_estimators': 10, 'learning_rate': 1.0}
	AdaBoost	5	2	{'n_estimators': 50, 'learning_rate': 1.0}	{'n_estimators': 50, 'learning_rate': 1.0}	{'n_estimators': 10, 'learning_rate': 1.0}	{'n_estimators': 500, 'learning_rate': 0.01}	{'n_estimators': 10, 'learning_rate': 1.0}	{'n_estimators': 10, 'learning_rate': 1.0}	{'n_estimators': 10, 'learning_rate': 1.0}	{'n_estimators': 10, 'learning_rate': 1.0}
	XGBoost	1	1	{'subsample': 1.0, 'min_child_weight': 1, 'max_depth': 6, 'gamma': 0, 'colsample_bytree': 1.0}	{'subsample': 0.6, 'min_child_weight': 5, 'max_depth': 5, 'gamma': 0, 'colsample_bytree': 0.8}	{'subsample': 0.6, 'min_child_weight': 5, 'max_depth': 5, 'gamma': 0, 'colsample_bytree': 0.8}	{'subsample': 0.6, 'min_child_weight': 5, 'max_depth': 5, 'gamma': 0, 'colsample_bytree': 0.8}	{'subsample': 0.6, 'min_child_weight': 5, 'max_depth': 5, 'gamma': 0, 'colsample_bytree': 0.8}	{'subsample': 1.0, 'min_child_weight': 1, 'max_depth': 6, 'gamma': 0, 'colsample_bytree': 1.0}	{'subsample': 1.0, 'min_child_weight': 1, 'max_depth': 6, 'gamma': 0, 'colsample_bytree': 1.0}	{'subsample': 0.6, 'min_child_weight': 5, 'max_depth': 5, 'gamma': 0, 'colsample_bytree': 0.8}
	XGBoost	1	2	{'subsample': 1.0, 'min_child_weight': 1, 'max_depth': 6, 'gamma': 0, 'colsample_bytree': 1.0}	{'subsample': 0.6, 'min_child_weight': 5, 'max_depth': 5, 'gamma': 0, 'colsample_bytree': 0.8}	{'subsample': 0.6, 'min_child_weight': 5, 'max_depth': 5, 'gamma': 0, 'colsample_bytree': 0.8}	{'subsample': 0.8, 'min_child_weight': 10, 'max_depth': 6, 'gamma': 0, 'colsample_bytree': 0.6}	{'subsample': 0.6, 'min_child_weight': 5, 'max_depth': 5, 'gamma': 0, 'colsample_bytree': 0.8}	{'subsample': 1.0, 'min_child_weight': 1, 'max_depth': 6, 'gamma': 0, 'colsample_bytree': 1.0}	{'subsample': 1.0, 'min_child_weight': 1, 'max_depth': 6, 'gamma': 0, 'colsample_bytree': 1.0}	{'subsample': 0.6, 'min_child_weight': 5, 'max_depth': 5, 'gamma': 0, 'colsample_bytree': 0.8}
	XGBoost	2	1	{'subsample': 1.0, 'min_child_weight': 1, 'max_depth': 6, 'gamma': 0, 'colsample_bytree': 1.0}	{'subsample': 1.0, 'min_child_weight': 1, 'max_depth': 6, 'gamma': 0, 'colsample_bytree': 1.0}	{'subsample': 1.0, 'min_child_weight': 1, 'max_depth': 6, 'gamma': 0, 'colsample_bytree': 1.0}	{'subsample': 0.6, 'min_child_weight': 5, 'max_depth': 5, 'gamma': 0, 'colsample_bytree': 0.8}	{'subsample': 0.6, 'min_child_weight': 5, 'max_depth': 5, 'gamma': 0, 'colsample_bytree': 0.8}	{'subsample': 1.0, 'min_child_weight': 1, 'max_depth': 6, 'gamma': 0, 'colsample_bytree': 1.0}	{'subsample': 0.6, 'min_child_weight': 5, 'max_depth': 5, 'gamma': 0, 'colsample_bytree': 0.8}	{'subsample': 1.0, 'min_child_weight': 1, 'max_depth': 6, 'gamma': 0, 'colsample_bytree': 1.0}
	XGBoost	2	2	{'subsample': 1.0, 'min_child_weight': 1, 'max_depth': 6, 'gamma': 0, 'colsample_bytree': 1.0}	{'subsample': 0.8, 'min_child_weight': 10, 'max_depth': 6, 'gamma': 0, 'colsample_bytree': 0.6}	{'subsample': 0.8, 'min_child_weight': 10, 'max_depth': 6, 'gamma': 0, 'colsample_bytree': 0.6}	{'subsample': 0.6, 'min_child_weight': 5, 'max_depth': 5, 'gamma': 0, 'colsample_bytree': 0.8}	{'subsample': 0.6, 'min_child_weight': 5, 'max_depth': 5, 'gamma': 0, 'colsample_bytree': 0.8}	{'subsample': 1.0, 'min_child_weight': 1, 'max_depth': 6, 'gamma': 0, 'colsample_bytree': 1.0}	{'subsample': 1.0, 'min_child_weight': 1, 'max_depth': 6, 'gamma': 0, 'colsample_bytree': 1.0}	{'subsample': 0.8, 'min_child_weight': 10, 'max_depth': 6, 'gamma': 0, 'colsample_bytree': 0.6}
	XGBoost	3	1	{'subsample': 1.0, 'min_child_weight': 1, 'max_depth': 6, 'gamma': 0, 'colsample_bytree': 1.0}	{'subsample': 1.0, 'min_child_weight': 1, 'max_depth': 6, 'gamma': 0, 'colsample_bytree': 1.0}	{'subsample': 0.8, 'min_child_weight': 10, 'max_depth': 6, 'gamma': 0, 'colsample_bytree': 0.6}	{'subsample': 0.6, 'min_child_weight': 10, 'max_depth': 6, 'gamma': 0.5, 'colsample_bytree': 1.0}	{'subsample': 0.6, 'min_child_weight': 5, 'max_depth': 5, 'gamma': 0, 'colsample_bytree': 0.8}	{'subsample': 1.0, 'min_child_weight': 1, 'max_depth': 6, 'gamma': 0, 'colsample_bytree': 1.0}	{'subsample': 0.6, 'min_child_weight': 5, 'max_depth': 5, 'gamma': 0, 'colsample_bytree': 0.8}	{'subsample': 0.8, 'min_child_weight': 10, 'max_depth': 6, 'gamma': 0, 'colsample_bytree': 0.6}
	XGBoost	3	2	{'subsample': 1.0, 'min_child_weight': 1, 'max_depth': 6, 'gamma': 0, 'colsample_bytree': 1.0}	{'subsample': 0.8, 'min_child_weight': 10, 'max_depth': 6, 'gamma': 0, 'colsample_bytree': 0.6}	{'subsample': 0.8, 'min_child_weight': 10, 'max_depth': 6, 'gamma': 0, 'colsample_bytree': 0.6}	{'subsample': 0.8, 'min_child_weight': 10, 'max_depth': 6, 'gamma': 0, 'colsample_bytree': 0.6}	{'subsample': 0.6, 'min_child_weight': 5, 'max_depth': 5, 'gamma': 0, 'colsample_bytree': 0.8}	{'subsample': 1.0, 'min_child_weight': 1, 'max_depth': 6, 'gamma': 0, 'colsample_bytree': 1.0}	{'subsample': 1.0, 'min_child_weight': 1, 'max_depth': 6, 'gamma': 0, 'colsample_bytree': 1.0}	{'subsample': 0.8, 'min_child_weight': 10, 'max_depth': 6, 'gamma': 0, 'colsample_bytree': 0.6}
	XGBoost	4	1	{'subsample': 1.0, 'min_child_weight': 1, 'max_depth': 6, 'gamma': 0, 'colsample_bytree': 1.0}	{'subsample': 1.0, 'min_child_weight': 1, 'max_depth': 6, 'gamma': 0, 'colsample_bytree': 1.0}	{'subsample': 1.0, 'min_child_weight': 1, 'max_depth': 6, 'gamma': 0, 'colsample_bytree': 1.0}	{'subsample': 1.0, 'min_child_weight': 1, 'max_depth': 6, 'gamma': 0, 'colsample_bytree': 1.0}	{'subsample': 0.6, 'min_child_weight': 5, 'max_depth': 5, 'gamma': 0, 'colsample_bytree': 0.8}	{'subsample': 1.0, 'min_child_weight': 1, 'max_depth': 6, 'gamma': 0, 'colsample_bytree': 1.0}	{'subsample': 1.0, 'min_child_weight': 1, 'max_depth': 6, 'gamma': 0, 'colsample_bytree': 1.0}	{'subsample': 1.0, 'min_child_weight': 1, 'max_depth': 6, 'gamma': 0, 'colsample_bytree': 1.0}
	XGBoost	4	2	{'subsample': 1.0, 'min_child_weight': 1, 'max_depth': 6, 'gamma': 0, 'colsample_bytree': 1.0}	{'subsample': 0.6, 'min_child_weight': 5, 'max_depth': 5, 'gamma': 0, 'colsample_bytree': 0.8}	{'subsample': 0.8, 'min_child_weight': 10, 'max_depth': 6, 'gamma': 0, 'colsample_bytree': 0.6}	{'subsample': 0.8, 'min_child_weight': 10, 'max_depth': 6, 'gamma': 0, 'colsample_bytree': 0.6}	{'subsample': 0.6, 'min_child_weight': 5, 'max_depth': 5, 'gamma': 0, 'colsample_bytree': 0.8}	{'subsample': 1.0, 'min_child_weight': 1, 'max_depth': 6, 'gamma': 0, 'colsample_bytree': 1.0}	{'subsample': 1.0, 'min_child_weight': 1, 'max_depth': 6, 'gamma': 0, 'colsample_bytree': 1.0}	{'subsample': 0.8, 'min_child_weight': 10, 'max_depth': 6, 'gamma': 0, 'colsample_bytree': 0.6}
	XGBoost	5	1	{'subsample': 1.0, 'min_child_weight': 1, 'max_depth': 6, 'gamma': 0, 'colsample_bytree': 1.0}	{'subsample': 1.0, 'min_child_weight': 1, 'max_depth': 6, 'gamma': 0, 'colsample_bytree': 1.0}	{'subsample': 1.0, 'min_child_weight': 1, 'max_depth': 6, 'gamma': 0, 'colsample_bytree': 1.0}	{'subsample': 1.0, 'min_child_weight': 1, 'max_depth': 6, 'gamma': 0, 'colsample_bytree': 1.0}	{'subsample': 0.6, 'min_child_weight': 5, 'max_depth': 5, 'gamma': 0, 'colsample_bytree': 0.8}	{'subsample': 1.0, 'min_child_weight': 1, 'max_depth': 6, 'gamma': 0, 'colsample_bytree': 1.0}	{'subsample': 1.0, 'min_child_weight': 1, 'max_depth': 6, 'gamma': 0, 'colsample_bytree': 1.0}	{'subsample': 1.0, 'min_child_weight': 1, 'max_depth': 6, 'gamma': 0, 'colsample_bytree': 1.0}
	XGBoost	5	2	{'subsample': 1.0, 'min_child_weight': 1, 'max_depth': 6, 'gamma': 0, 'colsample_bytree': 1.0}	{'subsample': 0.6, 'min_child_weight': 5, 'max_depth': 5, 'gamma': 0, 'colsample_bytree': 0.8}	{'subsample': 0.6, 'min_child_weight': 5, 'max_depth': 5, 'gamma': 0, 'colsample_bytree': 0.8}	{'subsample': 1.0, 'min_child_weight': 1, 'max_depth': 6, 'gamma': 0, 'colsample_bytree': 1.0}	{'subsample': 0.6, 'min_child_weight': 5, 'max_depth': 5, 'gamma': 0, 'colsample_bytree': 0.8}	{'subsample': 1.0, 'min_child_weight': 1, 'max_depth': 6, 'gamma': 0, 'colsample_bytree': 1.0}	{'subsample': 1.0, 'min_child_weight': 1, 'max_depth': 6, 'gamma': 0, 'colsample_bytree': 1.0}	{'subsample': 0.6, 'min_child_weight': 5, 'max_depth': 5, 'gamma': 0, 'colsample_bytree': 0.8}
	RF	1	1	{'n_estimators': 500}	{'n_estimators': 100}	{'n_estimators': 500}	{'n_estimators': 500}	{'n_estimators': 100}	{'n_estimators': 3000}	{'n_estimators': 1000}	{'n_estimators': 500}
	RF	1	2	{'n_estimators': 3000}	{'n_estimators': 100}	{'n_estimators': 500}	{'n_estimators': 1000}	{'n_estimators': 100}	{'n_estimators': 500}	{'n_estimators': 100}	{'n_estimators': 500}
	RF	2	1	{'n_estimators': 100}	{'n_estimators': 100}	{'n_estimators': 100}	{'n_estimators': 100}	{'n_estimators': 100}	{'n_estimators': 100}	{'n_estimators': 3000}	{'n_estimators': 100}
	RF	2	2	{'n_estimators': 3000}	{'n_estimators': 100}	{'n_estimators': 100}	{'n_estimators': 500}	{'n_estimators': 100}	{'n_estimators': 500}	{'n_estimators': 500}	{'n_estimators': 100}
	RF	3	1	{'n_estimators': 100}	{'n_estimators': 100}	{'n_estimators': 100}	{'n_estimators': 3000}	{'n_estimators': 100}	{'n_estimators': 1000}	{'n_estimators': 100}	{'n_estimators': 100}
	RF	3	2	{'n_estimators': 500}	{'n_estimators': 100}	{'n_estimators': 100}	{'n_estimators': 500}	{'n_estimators': 100}	{'n_estimators': 1000}	{'n_estimators': 500}	{'n_estimators': 100}
	RF	4	1	{'n_estimators': 100}	{'n_estimators': 100}	{'n_estimators': 500}	{'n_estimators': 1000}	{'n_estimators': 100}	{'n_estimators': 100}	{'n_estimators': 1000}	{'n_estimators': 500}
	RF	4	2	{'n_estimators': 100}	{'n_estimators': 100}	{'n_estimators': 100}	{'n_estimators': 3000}	{'n_estimators': 100}	{'n_estimators': 100}	{'n_estimators': 3000}	{'n_estimators': 100}
	RF	5	1	{'n_estimators': 100}	{'n_estimators': 100}	{'n_estimators': 100}	{'n_estimators': 1000}	{'n_estimators': 100}	{'n_estimators': 100}	{'n_estimators': 1000}	{'n_estimators': 100}
	RF	5	2	{'n_estimators': 1000}	{'n_estimators': 100}	{'n_estimators': 500}	{'n_estimators': 3000}	{'n_estimators': 100}	{'n_estimators': 500}	{'n_estimators': 3000}	{'n_estimators': 500}
	SVM	1	1	{'gamma': 0.01, 'C': 1}	{'gamma': 1.0, 'C': 10}	{'gamma': 1.0, 'C': 10}	{'gamma': 1.0, 'C': 10}	{'gamma': 0.01, 'C': 1}	{'gamma': 0.01, 'C': 1}	{'gamma': 0.01, 'C': 1}	{'gamma': 1.0, 'C': 10}
	SVM	1	2	{'gamma': 0.01, 'C': 0.1}	{'gamma': 1.0, 'C': 10}	{'gamma': 1.0, 'C': 10}	{'gamma': 1.0, 'C': 10}	{'gamma': 0.01, 'C': 1}	{'gamma': 0.01, 'C': 1}	{'gamma': 0.01, 'C': 0.1}	{'gamma': 1.0, 'C': 10}
	SVM	2	1	{'gamma': 0.01, 'C': 1}	{'gamma': 1.0, 'C': 10}	{'gamma': 1.0, 'C': 10}	{'gamma': 1.0, 'C': 10}	{'gamma': 0.01, 'C': 1}	{'gamma': 0.01, 'C': 1}	{'gamma': 0.01, 'C': 0.1}	{'gamma': 1.0, 'C': 10}
	SVM	2	2	{'gamma': 0.01, 'C': 1}	{'gamma': 1.0, 'C': 10}	{'gamma': 1.0, 'C': 10}	{'gamma': 1.0, 'C': 10}	{'gamma': 0.01, 'C': 1}	{'gamma': 0.01, 'C': 1}	{'gamma': 0.01, 'C': 0.1}	{'gamma': 1.0, 'C': 10}
	SVM	3	1	{'gamma': 0.01, 'C': 1}	{'gamma': 1.0, 'C': 10}	{'gamma': 1.0, 'C': 10}	{'gamma': 1.0, 'C': 10}	{'gamma': 0.01, 'C': 1}	{'gamma': 0.01, 'C': 1}	{'gamma': 0.01, 'C': 1}	{'gamma': 1.0, 'C': 10}
	SVM	3	2	{'gamma': 0.01, 'C': 0.1}	{'gamma': 1.0, 'C': 10}	{'gamma': 1.0, 'C': 10}	{'gamma': 1.0, 'C': 10}	{'gamma': 0.01, 'C': 1}	{'gamma': 0.01, 'C': 0.1}	{'gamma': 0.01, 'C': 1}	{'gamma': 1.0, 'C': 10}
	SVM	4	1	{'gamma': 0.01, 'C': 1}	{'gamma': 1.0, 'C': 10}	{'gamma': 1.0, 'C': 10}	{'gamma': 1.0, 'C': 10}	{'gamma': 0.01, 'C': 1}	{'gamma': 0.01, 'C': 1}	{'gamma': 0.01, 'C': 1}	{'gamma': 1.0, 'C': 10}
	SVM	4	2	{'gamma': 0.01, 'C': 1}	{'gamma': 1.0, 'C': 10}	{'gamma': 1.0, 'C': 10}	{'gamma': 1.0, 'C': 10}	{'gamma': 0.01, 'C': 1}	{'gamma': 0.01, 'C': 0.1}	{'gamma': 0.01, 'C': 0.1}	{'gamma': 1.0, 'C': 10}
	SVM	5	1	{'gamma': 0.01, 'C': 0.1}	{'gamma': 1.0, 'C': 10}	{'gamma': 1.0, 'C': 10}	{'gamma': 1.0, 'C': 10}	{'gamma': 0.01, 'C': 1}	{'gamma': 0.01, 'C': 1}	{'gamma': 0.01, 'C': 0.1}	{'gamma': 1.0, 'C': 10}
	SVM	5	2	{'gamma': 0.01, 'C': 1}	{'gamma': 1.0, 'C': 10}	{'gamma': 1.0, 'C': 10}	{'gamma': 1.0, 'C': 10}	{'gamma': 0.01, 'C': 1}	{'gamma': 0.01, 'C': 1}	{'gamma': 0.01, 'C': 1}	{'gamma': 1.0, 'C': 10}
	LDA	1	1
	LDA	1	2
	LDA	2	1
	LDA	2	2
	LDA	3	1
	LDA	3	2
	LDA	4	1
	LDA	4	2
	LDA	5	1
	LDA	5	2
	Lasso	1	1	{'C': 0.1}	{'C': 0.1}	{'C': 0.1}	{'C': 0.1}	{'C': 0.1}	{'C': 10}	{'C': 0.1}	{'C': 0.1}
	Lasso	1	2	{'C': 10}	{'C': 0.1}	{'C': 0.1}	{'C': 10}	{'C': 0.1}	{'C': 0.1}	{'C': 0.1}	{'C': 0.1}
	Lasso	2	1	{'C': 1}	{'C': 0.1}	{'C': 0.1}	{'C': 0.1}	{'C': 0.1}	{'C': 0.1}	{'C': 0.1}	{'C': 0.1}
	Lasso	2	2	{'C': 10}	{'C': 0.1}	{'C': 0.1}	{'C': 0.1}	{'C': 0.1}	{'C': 0.1}	{'C': 0.1}	{'C': 0.1}
	Lasso	3	1	{'C': 1}	{'C': 1}	{'C': 0.1}	{'C': 0.1}	{'C': 1}	{'C': 0.1}	{'C': 0.1}	{'C': 0.1}
	Lasso	3	2	{'C': 10}	{'C': 0.1}	{'C': 0.1}	{'C': 0.1}	{'C': 0.1}	{'C': 10}	{'C': 10}	{'C': 0.1}
	Lasso	4	1	{'C': 10}	{'C': 0.1}	{'C': 0.1}	{'C': 10}	{'C': 0.1}	{'C': 0.1}	{'C': 0.1}	{'C': 0.1}
	Lasso	4	2	{'C': 10}	{'C': 0.1}	{'C': 0.1}	{'C': 0.1}	{'C': 0.1}	{'C': 10}	{'C': 0.1}	{'C': 0.1}
	Lasso	5	1	{'C': 0.1}	{'C': 10}	{'C': 0.1}	{'C': 0.1}	{'C': 0.1}	{'C': 10}	{'C': 0.1}	{'C': 0.1}
	Lasso	5	2	{'C': 10}	{'C': 0.1}	{'C': 0.1}	{'C': 0.1}	{'C': 0.1}	{'C': 0.1}	{'C': 0.1}	{'C': 0.1}
	Ridge	1	1	{'C': 1}	{'C': 10}	{'C': 10}	{'C': 1}	{'C': 0.1}	{'C': 0.1}	{'C': 0.1}	{'C': 10}
	Ridge	1	2	{'C': 0.1}	{'C': 10}	{'C': 10}	{'C': 10}	{'C': 0.1}	{'C': 1}	{'C': 10}	{'C': 10}
	Ridge	2	1	{'C': 0.1}	{'C': 10}	{'C': 10}	{'C': 0.1}	{'C': 0.1}	{'C': 10}	{'C': 0.1}	{'C': 10}
	Ridge	2	2	{'C': 10}	{'C': 1}	{'C': 10}	{'C': 10}	{'C': 0.1}	{'C': 10}	{'C': 10}	{'C': 10}
	Ridge	3	1	{'C': 10}	{'C': 10}	{'C': 10}	{'C': 0.1}	{'C': 0.1}	{'C': 1}	{'C': 0.1}	{'C': 10}
	Ridge	3	2	{'C': 1}	{'C': 10}	{'C': 10}	{'C': 0.1}	{'C': 0.1}	{'C': 10}	{'C': 10}	{'C': 10}
	Ridge	4	1	{'C': 0.1}	{'C': 0.1}	{'C': 0.1}	{'C': 10}	{'C': 0.1}	{'C': 10}	{'C': 0.1}	{'C': 0.1}
	Ridge	4	2	{'C': 0.1}	{'C': 10}	{'C': 10}	{'C': 10}	{'C': 0.1}	{'C': 10}	{'C': 10}	{'C': 10}
	Ridge	5	1	{'C': 1}	{'C': 10}	{'C': 1}	{'C': 10}	{'C': 0.1}	{'C': 10}	{'C': 0.1}	{'C': 1}
	Ridge	5	2	{'C': 10}	{'C': 10}	{'C': 10}	{'C': 10}	{'C': 0.1}	{'C': 1}	{'C': 0.1}	{'C': 10}
	ElasticNet	1	1	{'C': 0.1}	{'C': 0.1}	{'C': 0.1}	{'C': 0.1}	{'C': 0.1}	{'C': 1}	{'C': 0.1}	{'C': 0.1}
	ElasticNet	1	2	{'C': 10}	{'C': 10}	{'C': 0.1}	{'C': 1}	{'C': 0.1}	{'C': 0.1}	{'C': 0.1}	{'C': 0.1}
	ElasticNet	2	1	{'C': 1}	{'C': 0.1}	{'C': 0.1}	{'C': 0.1}	{'C': 0.1}	{'C': 0.1}	{'C': 0.1}	{'C': 0.1}
	ElasticNet	2	2	{'C': 0.1}	{'C': 0.1}	{'C': 0.1}	{'C': 0.1}	{'C': 0.1}	{'C': 0.1}	{'C': 0.1}	{'C': 0.1}
	ElasticNet	3	1	{'C': 10}	{'C': 1}	{'C': 0.1}	{'C': 0.1}	{'C': 0.1}	{'C': 0.1}	{'C': 0.1}	{'C': 0.1}
	ElasticNet	3	2	{'C': 10}	{'C': 0.1}	{'C': 0.1}	{'C': 0.1}	{'C': 0.1}	{'C': 10}	{'C': 10}	{'C': 0.1}
	ElasticNet	4	1	{'C': 10}	{'C': 0.1}	{'C': 0.1}	{'C': 1}	{'C': 0.1}	{'C': 1}	{'C': 0.1}	{'C': 0.1}
	ElasticNet	4	2	{'C': 10}	{'C': 10}	{'C': 0.1}	{'C': 0.1}	{'C': 0.1}	{'C': 10}	{'C': 0.1}	{'C': 0.1}
	ElasticNet	5	1	{'C': 10}	{'C': 10}	{'C': 0.1}	{'C': 0.1}	{'C': 0.1}	{'C': 10}	{'C': 0.1}	{'C': 0.1}
	ElasticNet	5	2	{'C': 10}	{'C': 10}	{'C': 0.1}	{'C': 0.1}	{'C': 0.1}	{'C': 0.1}	{'C': 0.1}	{'C': 0.1}

## Sheet: 3. Covtype4
	Algorithm	Iteration	Fold	Without Sampling	O_Random	O_SMOTE	O_Border	U_Random	U_Condensed	U_NearMiss	SMOTETomek
	AdaBoost	1	1	{'n_estimators': 50, 'learning_rate': 1.0}	{'n_estimators': 50, 'learning_rate': 1.0}	{'n_estimators': 50, 'learning_rate': 1.0}	{'n_estimators': 50, 'learning_rate': 1.0}	{'n_estimators': 500, 'learning_rate': 0.01}	{'n_estimators': 50, 'learning_rate': 1.0}	{'n_estimators': 50, 'learning_rate': 1.0}	{'n_estimators': 50, 'learning_rate': 1.0}
	AdaBoost	1	2	{'n_estimators': 50, 'learning_rate': 1.0}	{'n_estimators': 50, 'learning_rate': 1.0}	{'n_estimators': 50, 'learning_rate': 1.0}	{'n_estimators': 50, 'learning_rate': 1.0}	{'n_estimators': 10, 'learning_rate': 1.0}	{'n_estimators': 50, 'learning_rate': 1.0}	{'n_estimators': 50, 'learning_rate': 1.0}	{'n_estimators': 50, 'learning_rate': 1.0}
	AdaBoost	2	1	{'n_estimators': 50, 'learning_rate': 1.0}	{'n_estimators': 50, 'learning_rate': 1.0}	{'n_estimators': 50, 'learning_rate': 1.0}	{'n_estimators': 50, 'learning_rate': 1.0}	{'n_estimators': 50, 'learning_rate': 1.0}	{'n_estimators': 50, 'learning_rate': 1.0}	{'n_estimators': 50, 'learning_rate': 1.0}	{'n_estimators': 50, 'learning_rate': 1.0}
	AdaBoost	2	2	{'n_estimators': 50, 'learning_rate': 1.0}	{'n_estimators': 50, 'learning_rate': 1.0}	{'n_estimators': 50, 'learning_rate': 1.0}	{'n_estimators': 50, 'learning_rate': 1.0}	{'n_estimators': 500, 'learning_rate': 0.01}	{'n_estimators': 50, 'learning_rate': 1.0}	{'n_estimators': 50, 'learning_rate': 1.0}	{'n_estimators': 50, 'learning_rate': 1.0}
	AdaBoost	3	1	{'n_estimators': 50, 'learning_rate': 1.0}	{'n_estimators': 50, 'learning_rate': 1.0}	{'n_estimators': 50, 'learning_rate': 1.0}	{'n_estimators': 50, 'learning_rate': 1.0}	{'n_estimators': 500, 'learning_rate': 0.01}	{'n_estimators': 50, 'learning_rate': 1.0}	{'n_estimators': 50, 'learning_rate': 1.0}	{'n_estimators': 50, 'learning_rate': 1.0}
	AdaBoost	3	2	{'n_estimators': 50, 'learning_rate': 1.0}	{'n_estimators': 50, 'learning_rate': 1.0}	{'n_estimators': 50, 'learning_rate': 1.0}	{'n_estimators': 50, 'learning_rate': 1.0}	{'n_estimators': 500, 'learning_rate': 0.01}	{'n_estimators': 50, 'learning_rate': 1.0}	{'n_estimators': 50, 'learning_rate': 1.0}	{'n_estimators': 50, 'learning_rate': 1.0}
	AdaBoost	4	1	{'n_estimators': 50, 'learning_rate': 1.0}	{'n_estimators': 50, 'learning_rate': 1.0}	{'n_estimators': 50, 'learning_rate': 1.0}	{'n_estimators': 50, 'learning_rate': 1.0}	{'n_estimators': 500, 'learning_rate': 0.01}	{'n_estimators': 50, 'learning_rate': 1.0}	{'n_estimators': 50, 'learning_rate': 1.0}	{'n_estimators': 50, 'learning_rate': 1.0}
	AdaBoost	4	2	{'n_estimators': 50, 'learning_rate': 1.0}	{'n_estimators': 50, 'learning_rate': 1.0}	{'n_estimators': 50, 'learning_rate': 1.0}	{'n_estimators': 50, 'learning_rate': 1.0}	{'n_estimators': 500, 'learning_rate': 0.01}	{'n_estimators': 50, 'learning_rate': 1.0}	{'n_estimators': 50, 'learning_rate': 1.0}	{'n_estimators': 50, 'learning_rate': 1.0}
	AdaBoost	5	1	{'n_estimators': 50, 'learning_rate': 1.0}	{'n_estimators': 50, 'learning_rate': 1.0}	{'n_estimators': 50, 'learning_rate': 1.0}	{'n_estimators': 50, 'learning_rate': 1.0}	{'n_estimators': 500, 'learning_rate': 0.01}	{'n_estimators': 50, 'learning_rate': 1.0}	{'n_estimators': 50, 'learning_rate': 1.0}	{'n_estimators': 50, 'learning_rate': 1.0}
	AdaBoost	5	2	{'n_estimators': 50, 'learning_rate': 1.0}	{'n_estimators': 50, 'learning_rate': 1.0}	{'n_estimators': 50, 'learning_rate': 1.0}	{'n_estimators': 50, 'learning_rate': 1.0}	{'n_estimators': 10, 'learning_rate': 1.0}	{'n_estimators': 50, 'learning_rate': 1.0}	{'n_estimators': 50, 'learning_rate': 1.0}	{'n_estimators': 50, 'learning_rate': 1.0}
	XGBoost	1	1	{'subsample': 1.0, 'min_child_weight': 1, 'max_depth': 6, 'gamma': 0, 'colsample_bytree': 1.0}	{'subsample': 1.0, 'min_child_weight': 1, 'max_depth': 6, 'gamma': 0, 'colsample_bytree': 1.0}	{'subsample': 1.0, 'min_child_weight': 1, 'max_depth': 6, 'gamma': 0, 'colsample_bytree': 1.0}	{'subsample': 1.0, 'min_child_weight': 1, 'max_depth': 6, 'gamma': 0, 'colsample_bytree': 1.0}	{'subsample': 1.0, 'min_child_weight': 1, 'max_depth': 6, 'gamma': 0, 'colsample_bytree': 1.0}	{'subsample': 1.0, 'min_child_weight': 1, 'max_depth': 6, 'gamma': 0, 'colsample_bytree': 1.0}	{'subsample': 1.0, 'min_child_weight': 1, 'max_depth': 6, 'gamma': 0, 'colsample_bytree': 1.0}	{'subsample': 1.0, 'min_child_weight': 1, 'max_depth': 6, 'gamma': 0, 'colsample_bytree': 1.0}
	XGBoost	1	2	{'subsample': 1.0, 'min_child_weight': 1, 'max_depth': 6, 'gamma': 0, 'colsample_bytree': 1.0}	{'subsample': 1.0, 'min_child_weight': 1, 'max_depth': 6, 'gamma': 0, 'colsample_bytree': 1.0}	{'subsample': 1.0, 'min_child_weight': 1, 'max_depth': 6, 'gamma': 0, 'colsample_bytree': 1.0}	{'subsample': 1.0, 'min_child_weight': 1, 'max_depth': 6, 'gamma': 0, 'colsample_bytree': 1.0}	{'subsample': 1.0, 'min_child_weight': 1, 'max_depth': 6, 'gamma': 0, 'colsample_bytree': 1.0}	{'subsample': 1.0, 'min_child_weight': 1, 'max_depth': 6, 'gamma': 0, 'colsample_bytree': 1.0}	{'subsample': 1.0, 'min_child_weight': 1, 'max_depth': 6, 'gamma': 0, 'colsample_bytree': 1.0}	{'subsample': 1.0, 'min_child_weight': 1, 'max_depth': 6, 'gamma': 0, 'colsample_bytree': 1.0}
	XGBoost	2	1	{'subsample': 1.0, 'min_child_weight': 1, 'max_depth': 6, 'gamma': 0, 'colsample_bytree': 1.0}	{'subsample': 1.0, 'min_child_weight': 1, 'max_depth': 6, 'gamma': 0, 'colsample_bytree': 1.0}	{'subsample': 1.0, 'min_child_weight': 1, 'max_depth': 6, 'gamma': 0, 'colsample_bytree': 1.0}	{'subsample': 1.0, 'min_child_weight': 1, 'max_depth': 6, 'gamma': 0, 'colsample_bytree': 1.0}	{'subsample': 0.6, 'min_child_weight': 5, 'max_depth': 5, 'gamma': 0, 'colsample_bytree': 0.8}	{'subsample': 1.0, 'min_child_weight': 1, 'max_depth': 6, 'gamma': 0, 'colsample_bytree': 1.0}	{'subsample': 1.0, 'min_child_weight': 1, 'max_depth': 6, 'gamma': 0, 'colsample_bytree': 1.0}	{'subsample': 1.0, 'min_child_weight': 1, 'max_depth': 6, 'gamma': 0, 'colsample_bytree': 1.0}
	XGBoost	2	2	{'subsample': 1.0, 'min_child_weight': 1, 'max_depth': 6, 'gamma': 0, 'colsample_bytree': 1.0}	{'subsample': 0.8, 'min_child_weight': 10, 'max_depth': 6, 'gamma': 0, 'colsample_bytree': 0.6}	{'subsample': 0.6, 'min_child_weight': 10, 'max_depth': 6, 'gamma': 0.5, 'colsample_bytree': 1.0}	{'subsample': 0.8, 'min_child_weight': 10, 'max_depth': 6, 'gamma': 0, 'colsample_bytree': 0.6}	{'subsample': 1.0, 'min_child_weight': 1, 'max_depth': 6, 'gamma': 0, 'colsample_bytree': 1.0}	{'subsample': 1.0, 'min_child_weight': 1, 'max_depth': 6, 'gamma': 0, 'colsample_bytree': 1.0}	{'subsample': 1.0, 'min_child_weight': 1, 'max_depth': 6, 'gamma': 0, 'colsample_bytree': 1.0}	{'subsample': 0.6, 'min_child_weight': 10, 'max_depth': 6, 'gamma': 0.5, 'colsample_bytree': 1.0}
	XGBoost	3	1	{'subsample': 1.0, 'min_child_weight': 1, 'max_depth': 6, 'gamma': 0, 'colsample_bytree': 1.0}	{'subsample': 1.0, 'min_child_weight': 1, 'max_depth': 6, 'gamma': 0, 'colsample_bytree': 1.0}	{'subsample': 1.0, 'min_child_weight': 1, 'max_depth': 6, 'gamma': 0, 'colsample_bytree': 1.0}	{'subsample': 1.0, 'min_child_weight': 1, 'max_depth': 6, 'gamma': 0, 'colsample_bytree': 1.0}	{'subsample': 1.0, 'min_child_weight': 1, 'max_depth': 6, 'gamma': 0, 'colsample_bytree': 1.0}	{'subsample': 1.0, 'min_child_weight': 1, 'max_depth': 6, 'gamma': 0, 'colsample_bytree': 1.0}	{'subsample': 1.0, 'min_child_weight': 1, 'max_depth': 6, 'gamma': 0, 'colsample_bytree': 1.0}	{'subsample': 1.0, 'min_child_weight': 1, 'max_depth': 6, 'gamma': 0, 'colsample_bytree': 1.0}
	XGBoost	3	2	{'subsample': 1.0, 'min_child_weight': 1, 'max_depth': 6, 'gamma': 0, 'colsample_bytree': 1.0}	{'subsample': 1.0, 'min_child_weight': 1, 'max_depth': 6, 'gamma': 0, 'colsample_bytree': 1.0}	{'subsample': 1.0, 'min_child_weight': 1, 'max_depth': 6, 'gamma': 0, 'colsample_bytree': 1.0}	{'subsample': 0.8, 'min_child_weight': 10, 'max_depth': 6, 'gamma': 0, 'colsample_bytree': 0.6}	{'subsample': 1.0, 'min_child_weight': 1, 'max_depth': 6, 'gamma': 0, 'colsample_bytree': 1.0}	{'subsample': 1.0, 'min_child_weight': 1, 'max_depth': 6, 'gamma': 0, 'colsample_bytree': 1.0}	{'subsample': 1.0, 'min_child_weight': 1, 'max_depth': 6, 'gamma': 0, 'colsample_bytree': 1.0}	{'subsample': 1.0, 'min_child_weight': 1, 'max_depth': 6, 'gamma': 0, 'colsample_bytree': 1.0}
	XGBoost	4	1	{'subsample': 1.0, 'min_child_weight': 1, 'max_depth': 6, 'gamma': 0, 'colsample_bytree': 1.0}	{'subsample': 1.0, 'min_child_weight': 1, 'max_depth': 6, 'gamma': 0, 'colsample_bytree': 1.0}	{'subsample': 1.0, 'min_child_weight': 1, 'max_depth': 6, 'gamma': 0, 'colsample_bytree': 1.0}	{'subsample': 1.0, 'min_child_weight': 1, 'max_depth': 6, 'gamma': 0, 'colsample_bytree': 1.0}	{'subsample': 1.0, 'min_child_weight': 1, 'max_depth': 6, 'gamma': 0, 'colsample_bytree': 1.0}	{'subsample': 1.0, 'min_child_weight': 1, 'max_depth': 6, 'gamma': 0, 'colsample_bytree': 1.0}	{'subsample': 1.0, 'min_child_weight': 1, 'max_depth': 6, 'gamma': 0, 'colsample_bytree': 1.0}	{'subsample': 1.0, 'min_child_weight': 1, 'max_depth': 6, 'gamma': 0, 'colsample_bytree': 1.0}
	XGBoost	4	2	{'subsample': 1.0, 'min_child_weight': 1, 'max_depth': 6, 'gamma': 0, 'colsample_bytree': 1.0}	{'subsample': 1.0, 'min_child_weight': 1, 'max_depth': 6, 'gamma': 0, 'colsample_bytree': 1.0}	{'subsample': 1.0, 'min_child_weight': 1, 'max_depth': 6, 'gamma': 0, 'colsample_bytree': 1.0}	{'subsample': 1.0, 'min_child_weight': 1, 'max_depth': 6, 'gamma': 0, 'colsample_bytree': 1.0}	{'subsample': 1.0, 'min_child_weight': 1, 'max_depth': 6, 'gamma': 0, 'colsample_bytree': 1.0}	{'subsample': 1.0, 'min_child_weight': 1, 'max_depth': 6, 'gamma': 0, 'colsample_bytree': 1.0}	{'subsample': 1.0, 'min_child_weight': 1, 'max_depth': 6, 'gamma': 0, 'colsample_bytree': 1.0}	{'subsample': 1.0, 'min_child_weight': 1, 'max_depth': 6, 'gamma': 0, 'colsample_bytree': 1.0}
	XGBoost	5	1	{'subsample': 1.0, 'min_child_weight': 1, 'max_depth': 6, 'gamma': 0, 'colsample_bytree': 1.0}	{'subsample': 1.0, 'min_child_weight': 1, 'max_depth': 6, 'gamma': 0, 'colsample_bytree': 1.0}	{'subsample': 1.0, 'min_child_weight': 1, 'max_depth': 6, 'gamma': 0, 'colsample_bytree': 1.0}	{'subsample': 1.0, 'min_child_weight': 1, 'max_depth': 6, 'gamma': 0, 'colsample_bytree': 1.0}	{'subsample': 1.0, 'min_child_weight': 1, 'max_depth': 6, 'gamma': 0, 'colsample_bytree': 1.0}	{'subsample': 1.0, 'min_child_weight': 1, 'max_depth': 6, 'gamma': 0, 'colsample_bytree': 1.0}	{'subsample': 1.0, 'min_child_weight': 1, 'max_depth': 6, 'gamma': 0, 'colsample_bytree': 1.0}	{'subsample': 1.0, 'min_child_weight': 1, 'max_depth': 6, 'gamma': 0, 'colsample_bytree': 1.0}
	XGBoost	5	2	{'subsample': 1.0, 'min_child_weight': 1, 'max_depth': 6, 'gamma': 0, 'colsample_bytree': 1.0}	{'subsample': 1.0, 'min_child_weight': 1, 'max_depth': 6, 'gamma': 0, 'colsample_bytree': 1.0}	{'subsample': 1.0, 'min_child_weight': 1, 'max_depth': 6, 'gamma': 0, 'colsample_bytree': 1.0}	{'subsample': 1.0, 'min_child_weight': 1, 'max_depth': 6, 'gamma': 0, 'colsample_bytree': 1.0}	{'subsample': 1.0, 'min_child_weight': 1, 'max_depth': 6, 'gamma': 0, 'colsample_bytree': 1.0}	{'subsample': 1.0, 'min_child_weight': 1, 'max_depth': 6, 'gamma': 0, 'colsample_bytree': 1.0}	{'subsample': 1.0, 'min_child_weight': 1, 'max_depth': 6, 'gamma': 0, 'colsample_bytree': 1.0}	{'subsample': 1.0, 'min_child_weight': 1, 'max_depth': 6, 'gamma': 0, 'colsample_bytree': 1.0}
	RF	1	1	{'n_estimators': 1000}	{'n_estimators': 500}	{'n_estimators': 500}	{'n_estimators': 3000}	{'n_estimators': 3000}	{'n_estimators': 3000}	{'n_estimators': 3000}	{'n_estimators': 500}
	RF	1	2	{'n_estimators': 3000}	{'n_estimators': 500}	{'n_estimators': 3000}	{'n_estimators': 3000}	{'n_estimators': 3000}	{'n_estimators': 3000}	{'n_estimators': 3000}	{'n_estimators': 3000}
	RF	2	1	{'n_estimators': 1000}	{'n_estimators': 100}	{'n_estimators': 3000}	{'n_estimators': 3000}	{'n_estimators': 3000}	{'n_estimators': 3000}	{'n_estimators': 1000}	{'n_estimators': 3000}
	RF	2	2	{'n_estimators': 3000}	{'n_estimators': 3000}	{'n_estimators': 1000}	{'n_estimators': 3000}	{'n_estimators': 3000}	{'n_estimators': 3000}	{'n_estimators': 3000}	{'n_estimators': 1000}
	RF	3	1	{'n_estimators': 3000}	{'n_estimators': 500}	{'n_estimators': 3000}	{'n_estimators': 3000}	{'n_estimators': 3000}	{'n_estimators': 3000}	{'n_estimators': 1000}	{'n_estimators': 3000}
	RF	3	2	{'n_estimators': 3000}	{'n_estimators': 500}	{'n_estimators': 3000}	{'n_estimators': 3000}	{'n_estimators': 3000}	{'n_estimators': 1000}	{'n_estimators': 3000}	{'n_estimators': 3000}
	RF	4	1	{'n_estimators': 3000}	{'n_estimators': 1000}	{'n_estimators': 3000}	{'n_estimators': 1000}	{'n_estimators': 100}	{'n_estimators': 3000}	{'n_estimators': 500}	{'n_estimators': 3000}
	RF	4	2	{'n_estimators': 3000}	{'n_estimators': 100}	{'n_estimators': 3000}	{'n_estimators': 3000}	{'n_estimators': 3000}	{'n_estimators': 500}	{'n_estimators': 500}	{'n_estimators': 3000}
	RF	5	1	{'n_estimators': 3000}	{'n_estimators': 3000}	{'n_estimators': 3000}	{'n_estimators': 3000}	{'n_estimators': 3000}	{'n_estimators': 3000}	{'n_estimators': 3000}	{'n_estimators': 3000}
	RF	5	2	{'n_estimators': 1000}	{'n_estimators': 500}	{'n_estimators': 3000}	{'n_estimators': 1000}	{'n_estimators': 500}	{'n_estimators': 1000}	{'n_estimators': 3000}	{'n_estimators': 3000}
	SVM	1	1	{'gamma': 1.0, 'C': 10}	{'gamma': 1.0, 'C': 10}	{'gamma': 1.0, 'C': 10}	{'gamma': 1.0, 'C': 10}	{'gamma': 1.0, 'C': 10}	{'gamma': 1.0, 'C': 10}	{'gamma': 1.0, 'C': 10}	{'gamma': 1.0, 'C': 10}
	SVM	1	2	{'gamma': 1.0, 'C': 10}	{'gamma': 1.0, 'C': 10}	{'gamma': 1.0, 'C': 10}	{'gamma': 1.0, 'C': 10}	{'gamma': 1.0, 'C': 10}	{'gamma': 1.0, 'C': 10}	{'gamma': 1.0, 'C': 10}	{'gamma': 1.0, 'C': 10}
	SVM	2	1	{'gamma': 1.0, 'C': 10}	{'gamma': 1.0, 'C': 10}	{'gamma': 1.0, 'C': 10}	{'gamma': 1.0, 'C': 10}	{'gamma': 1.0, 'C': 10}	{'gamma': 1.0, 'C': 10}	{'gamma': 1.0, 'C': 10}	{'gamma': 1.0, 'C': 10}
	SVM	2	2	{'gamma': 1.0, 'C': 10}	{'gamma': 1.0, 'C': 10}	{'gamma': 1.0, 'C': 10}	{'gamma': 1.0, 'C': 10}	{'gamma': 1.0, 'C': 10}	{'gamma': 1.0, 'C': 10}	{'gamma': 1.0, 'C': 10}	{'gamma': 1.0, 'C': 10}
	SVM	3	1	{'gamma': 1.0, 'C': 10}	{'gamma': 1.0, 'C': 10}	{'gamma': 1.0, 'C': 10}	{'gamma': 1.0, 'C': 10}	{'gamma': 1.0, 'C': 10}	{'gamma': 1.0, 'C': 10}	{'gamma': 1.0, 'C': 10}	{'gamma': 1.0, 'C': 10}
	SVM	3	2	{'gamma': 1.0, 'C': 10}	{'gamma': 1.0, 'C': 10}	{'gamma': 1.0, 'C': 10}	{'gamma': 1.0, 'C': 10}	{'gamma': 1.0, 'C': 10}	{'gamma': 1.0, 'C': 10}	{'gamma': 1.0, 'C': 10}	{'gamma': 1.0, 'C': 10}
	SVM	4	1	{'gamma': 1.0, 'C': 10}	{'gamma': 1.0, 'C': 10}	{'gamma': 1.0, 'C': 10}	{'gamma': 1.0, 'C': 10}	{'gamma': 1.0, 'C': 10}	{'gamma': 1.0, 'C': 10}	{'gamma': 1.0, 'C': 10}	{'gamma': 1.0, 'C': 10}
	SVM	4	2	{'gamma': 1.0, 'C': 10}	{'gamma': 1.0, 'C': 10}	{'gamma': 1.0, 'C': 10}	{'gamma': 1.0, 'C': 10}	{'gamma': 1.0, 'C': 10}	{'gamma': 1.0, 'C': 10}	{'gamma': 1.0, 'C': 10}	{'gamma': 1.0, 'C': 10}
	SVM	5	1	{'gamma': 0.01, 'C': 1}	{'gamma': 1.0, 'C': 10}	{'gamma': 1.0, 'C': 10}	{'gamma': 1.0, 'C': 10}	{'gamma': 1.0, 'C': 10}	{'gamma': 1.0, 'C': 10}	{'gamma': 1.0, 'C': 10}	{'gamma': 1.0, 'C': 10}
	SVM	5	2	{'gamma': 1.0, 'C': 10}	{'gamma': 1.0, 'C': 10}	{'gamma': 1.0, 'C': 10}	{'gamma': 1.0, 'C': 10}	{'gamma': 1.0, 'C': 10}	{'gamma': 1.0, 'C': 10}	{'gamma': 1.0, 'C': 10}	{'gamma': 1.0, 'C': 10}
	LDA	1	1
	LDA	1	2
	LDA	2	1
	LDA	2	2
	LDA	3	1
	LDA	3	2
	LDA	4	1
	LDA	4	2
	LDA	5	1
	LDA	5	2
	Lasso	1	1	{'C': 10}	{'C': 10}	{'C': 10}	{'C': 10}	{'C': 10}	{'C': 10}	{'C': 10}	{'C': 10}
	Lasso	1	2	{'C': 10}	{'C': 10}	{'C': 10}	{'C': 10}	{'C': 10}	{'C': 10}	{'C': 10}	{'C': 10}
	Lasso	2	1	{'C': 10}	{'C': 10}	{'C': 10}	{'C': 10}	{'C': 10}	{'C': 10}	{'C': 10}	{'C': 10}
	Lasso	2	2	{'C': 10}	{'C': 10}	{'C': 10}	{'C': 10}	{'C': 10}	{'C': 10}	{'C': 10}	{'C': 10}
	Lasso	3	1	{'C': 10}	{'C': 10}	{'C': 10}	{'C': 10}	{'C': 1}	{'C': 10}	{'C': 10}	{'C': 10}
	Lasso	3	2	{'C': 10}	{'C': 1}	{'C': 1}	{'C': 1}	{'C': 1}	{'C': 10}	{'C': 10}	{'C': 1}
	Lasso	4	1	{'C': 10}	{'C': 10}	{'C': 10}	{'C': 10}	{'C': 10}	{'C': 10}	{'C': 10}	{'C': 10}
	Lasso	4	2	{'C': 10}	{'C': 10}	{'C': 10}	{'C': 10}	{'C': 10}	{'C': 10}	{'C': 10}	{'C': 10}
	Lasso	5	1	{'C': 10}	{'C': 10}	{'C': 10}	{'C': 10}	{'C': 10}	{'C': 10}	{'C': 10}	{'C': 10}
	Lasso	5	2	{'C': 10}	{'C': 10}	{'C': 10}	{'C': 10}	{'C': 10}	{'C': 10}	{'C': 10}	{'C': 10}
	Ridge	1	1	{'C': 10}	{'C': 10}	{'C': 10}	{'C': 10}	{'C': 10}	{'C': 0.1}	{'C': 10}	{'C': 10}
	Ridge	1	2	{'C': 10}	{'C': 10}	{'C': 10}	{'C': 10}	{'C': 10}	{'C': 0.1}	{'C': 10}	{'C': 10}
	Ridge	2	1	{'C': 10}	{'C': 10}	{'C': 10}	{'C': 10}	{'C': 10}	{'C': 0.1}	{'C': 10}	{'C': 10}
	Ridge	2	2	{'C': 10}	{'C': 10}	{'C': 10}	{'C': 10}	{'C': 10}	{'C': 0.1}	{'C': 10}	{'C': 10}
	Ridge	3	1	{'C': 10}	{'C': 10}	{'C': 10}	{'C': 10}	{'C': 10}	{'C': 0.1}	{'C': 10}	{'C': 10}
	Ridge	3	2	{'C': 10}	{'C': 10}	{'C': 10}	{'C': 10}	{'C': 10}	{'C': 0.1}	{'C': 10}	{'C': 10}
	Ridge	4	1	{'C': 10}	{'C': 10}	{'C': 10}	{'C': 10}	{'C': 10}	{'C': 0.1}	{'C': 10}	{'C': 10}
	Ridge	4	2	{'C': 10}	{'C': 10}	{'C': 10}	{'C': 10}	{'C': 10}	{'C': 10}	{'C': 10}	{'C': 10}
	Ridge	5	1	{'C': 10}	{'C': 10}	{'C': 10}	{'C': 10}	{'C': 10}	{'C': 0.1}	{'C': 10}	{'C': 10}
	Ridge	5	2	{'C': 10}	{'C': 10}	{'C': 10}	{'C': 10}	{'C': 10}	{'C': 0.1}	{'C': 10}	{'C': 10}
	ElasticNet	1	1	{'C': 10}	{'C': 10}	{'C': 10}	{'C': 10}	{'C': 10}	{'C': 1}	{'C': 10}	{'C': 10}
	ElasticNet	1	2	{'C': 10}	{'C': 10}	{'C': 10}	{'C': 10}	{'C': 10}	{'C': 10}	{'C': 10}	{'C': 10}
	ElasticNet	2	1	{'C': 10}	{'C': 10}	{'C': 10}	{'C': 10}	{'C': 10}	{'C': 10}	{'C': 10}	{'C': 10}
	ElasticNet	2	2	{'C': 10}	{'C': 10}	{'C': 10}	{'C': 10}	{'C': 10}	{'C': 10}	{'C': 10}	{'C': 10}
	ElasticNet	3	1	{'C': 10}	{'C': 10}	{'C': 10}	{'C': 10}	{'C': 10}	{'C': 1}	{'C': 10}	{'C': 10}
	ElasticNet	3	2	{'C': 10}	{'C': 1}	{'C': 1}	{'C': 10}	{'C': 1}	{'C': 1}	{'C': 10}	{'C': 1}
	ElasticNet	4	1	{'C': 10}	{'C': 10}	{'C': 10}	{'C': 10}	{'C': 10}	{'C': 1}	{'C': 10}	{'C': 10}
	ElasticNet	4	2	{'C': 10}	{'C': 10}	{'C': 10}	{'C': 10}	{'C': 10}	{'C': 10}	{'C': 10}	{'C': 10}
	ElasticNet	5	1	{'C': 10}	{'C': 10}	{'C': 10}	{'C': 10}	{'C': 10}	{'C': 10}	{'C': 10}	{'C': 10}
	ElasticNet	5	2	{'C': 10}	{'C': 10}	{'C': 10}	{'C': 10}	{'C': 10}	{'C': 10}	{'C': 10}	{'C': 10}

## Sheet: 4. Abalone19
	Algorithm	Iteration	Fold	Without Sampling	O_Random	O_SMOTE	O_Border	U_Random	U_Condensed	U_NearMiss	SMOTETomek
	AdaBoost	1	1	{'n_estimators': 500, 'learning_rate': 0.01}	{'n_estimators': 50, 'learning_rate': 1.0}	{'n_estimators': 50, 'learning_rate': 1.0}	{'n_estimators': 50, 'learning_rate': 1.0}	{'n_estimators': 500, 'learning_rate': 0.01}	{'n_estimators': 500, 'learning_rate': 0.01}	{'n_estimators': 500, 'learning_rate': 0.01}	{'n_estimators': 50, 'learning_rate': 1.0}
	AdaBoost	1	2	{'n_estimators': 500, 'learning_rate': 0.01}	{'n_estimators': 50, 'learning_rate': 1.0}	{'n_estimators': 50, 'learning_rate': 1.0}	{'n_estimators': 50, 'learning_rate': 1.0}	{'n_estimators': 10, 'learning_rate': 1.0}	{'n_estimators': 10, 'learning_rate': 0.01}	{'n_estimators': 500, 'learning_rate': 0.01}	{'n_estimators': 50, 'learning_rate': 1.0}
	AdaBoost	2	1	{'n_estimators': 50, 'learning_rate': 1.0}	{'n_estimators': 50, 'learning_rate': 1.0}	{'n_estimators': 50, 'learning_rate': 1.0}	{'n_estimators': 50, 'learning_rate': 1.0}	{'n_estimators': 10, 'learning_rate': 1.0}	{'n_estimators': 10, 'learning_rate': 1.0}	{'n_estimators': 10, 'learning_rate': 1.0}	{'n_estimators': 50, 'learning_rate': 1.0}
	AdaBoost	2	2	{'n_estimators': 50, 'learning_rate': 1.0}	{'n_estimators': 50, 'learning_rate': 1.0}	{'n_estimators': 50, 'learning_rate': 1.0}	{'n_estimators': 50, 'learning_rate': 1.0}	{'n_estimators': 10, 'learning_rate': 0.01}	{'n_estimators': 50, 'learning_rate': 1.0}	{'n_estimators': 10, 'learning_rate': 1.0}	{'n_estimators': 50, 'learning_rate': 1.0}
	AdaBoost	3	1	{'n_estimators': 50, 'learning_rate': 1.0}	{'n_estimators': 50, 'learning_rate': 1.0}	{'n_estimators': 50, 'learning_rate': 1.0}	{'n_estimators': 50, 'learning_rate': 1.0}	{'n_estimators': 10, 'learning_rate': 1.0}	{'n_estimators': 500, 'learning_rate': 0.01}	{'n_estimators': 10, 'learning_rate': 0.01}	{'n_estimators': 50, 'learning_rate': 1.0}
	AdaBoost	3	2	{'n_estimators': 50, 'learning_rate': 1.0}	{'n_estimators': 50, 'learning_rate': 1.0}	{'n_estimators': 50, 'learning_rate': 1.0}	{'n_estimators': 50, 'learning_rate': 1.0}	{'n_estimators': 500, 'learning_rate': 0.01}	{'n_estimators': 50, 'learning_rate': 1.0}	{'n_estimators': 50, 'learning_rate': 1.0}	{'n_estimators': 50, 'learning_rate': 1.0}
	AdaBoost	4	1	{'n_estimators': 50, 'learning_rate': 1.0}	{'n_estimators': 50, 'learning_rate': 1.0}	{'n_estimators': 50, 'learning_rate': 1.0}	{'n_estimators': 50, 'learning_rate': 1.0}	{'n_estimators': 50, 'learning_rate': 1.0}	{'n_estimators': 500, 'learning_rate': 0.01}	{'n_estimators': 50, 'learning_rate': 1.0}	{'n_estimators': 50, 'learning_rate': 1.0}
	AdaBoost	4	2	{'n_estimators': 500, 'learning_rate': 0.01}	{'n_estimators': 50, 'learning_rate': 1.0}	{'n_estimators': 50, 'learning_rate': 1.0}	{'n_estimators': 50, 'learning_rate': 1.0}	{'n_estimators': 500, 'learning_rate': 0.01}	{'n_estimators': 50, 'learning_rate': 1.0}	{'n_estimators': 10, 'learning_rate': 1.0}	{'n_estimators': 50, 'learning_rate': 1.0}
	AdaBoost	5	1	{'n_estimators': 50, 'learning_rate': 1.0}	{'n_estimators': 50, 'learning_rate': 1.0}	{'n_estimators': 50, 'learning_rate': 1.0}	{'n_estimators': 50, 'learning_rate': 1.0}	{'n_estimators': 500, 'learning_rate': 0.01}	{'n_estimators': 50, 'learning_rate': 1.0}	{'n_estimators': 500, 'learning_rate': 0.01}	{'n_estimators': 50, 'learning_rate': 1.0}
	AdaBoost	5	2	{'n_estimators': 10, 'learning_rate': 1.0}	{'n_estimators': 50, 'learning_rate': 1.0}	{'n_estimators': 50, 'learning_rate': 1.0}	{'n_estimators': 50, 'learning_rate': 1.0}	{'n_estimators': 50, 'learning_rate': 1.0}	{'n_estimators': 50, 'learning_rate': 1.0}	{'n_estimators': 500, 'learning_rate': 0.01}	{'n_estimators': 50, 'learning_rate': 1.0}
	XGBoost	1	1	{'subsample': 1.0, 'min_child_weight': 1, 'max_depth': 6, 'gamma': 0, 'colsample_bytree': 1.0}	{'subsample': 1.0, 'min_child_weight': 1, 'max_depth': 6, 'gamma': 0, 'colsample_bytree': 1.0}	{'subsample': 1.0, 'min_child_weight': 1, 'max_depth': 6, 'gamma': 0, 'colsample_bytree': 1.0}	{'subsample': 1.0, 'min_child_weight': 1, 'max_depth': 6, 'gamma': 0, 'colsample_bytree': 1.0}	{'subsample': 1.0, 'min_child_weight': 1, 'max_depth': 6, 'gamma': 0, 'colsample_bytree': 1.0}	{'subsample': 0.6, 'min_child_weight': 10, 'max_depth': 6, 'gamma': 0.5, 'colsample_bytree': 1.0}	{'subsample': 1.0, 'min_child_weight': 1, 'max_depth': 6, 'gamma': 0, 'colsample_bytree': 1.0}	{'subsample': 1.0, 'min_child_weight': 1, 'max_depth': 6, 'gamma': 0, 'colsample_bytree': 1.0}
	XGBoost	1	2	{'subsample': 0.6, 'min_child_weight': 5, 'max_depth': 5, 'gamma': 0, 'colsample_bytree': 0.8}	{'subsample': 1.0, 'min_child_weight': 1, 'max_depth': 6, 'gamma': 0, 'colsample_bytree': 1.0}	{'subsample': 1.0, 'min_child_weight': 1, 'max_depth': 6, 'gamma': 0, 'colsample_bytree': 1.0}	{'subsample': 1.0, 'min_child_weight': 1, 'max_depth': 6, 'gamma': 0, 'colsample_bytree': 1.0}	{'subsample': 1.0, 'min_child_weight': 1, 'max_depth': 6, 'gamma': 0, 'colsample_bytree': 1.0}	{'subsample': 0.6, 'min_child_weight': 5, 'max_depth': 5, 'gamma': 0, 'colsample_bytree': 0.8}	{'subsample': 1.0, 'min_child_weight': 1, 'max_depth': 6, 'gamma': 0, 'colsample_bytree': 1.0}	{'subsample': 1.0, 'min_child_weight': 1, 'max_depth': 6, 'gamma': 0, 'colsample_bytree': 1.0}
	XGBoost	2	1	{'subsample': 1.0, 'min_child_weight': 1, 'max_depth': 6, 'gamma': 0, 'colsample_bytree': 1.0}	{'subsample': 1.0, 'min_child_weight': 1, 'max_depth': 6, 'gamma': 0, 'colsample_bytree': 1.0}	{'subsample': 1.0, 'min_child_weight': 1, 'max_depth': 6, 'gamma': 0, 'colsample_bytree': 1.0}	{'subsample': 1.0, 'min_child_weight': 1, 'max_depth': 6, 'gamma': 0, 'colsample_bytree': 1.0}	{'subsample': 1.0, 'min_child_weight': 1, 'max_depth': 6, 'gamma': 0, 'colsample_bytree': 1.0}	{'subsample': 0.6, 'min_child_weight': 5, 'max_depth': 5, 'gamma': 0, 'colsample_bytree': 0.8}	{'subsample': 1.0, 'min_child_weight': 1, 'max_depth': 6, 'gamma': 0, 'colsample_bytree': 1.0}	{'subsample': 1.0, 'min_child_weight': 1, 'max_depth': 6, 'gamma': 0, 'colsample_bytree': 1.0}
	XGBoost	2	2	{'subsample': 1.0, 'min_child_weight': 1, 'max_depth': 6, 'gamma': 0, 'colsample_bytree': 1.0}	{'subsample': 1.0, 'min_child_weight': 1, 'max_depth': 6, 'gamma': 0, 'colsample_bytree': 1.0}	{'subsample': 1.0, 'min_child_weight': 1, 'max_depth': 6, 'gamma': 0, 'colsample_bytree': 1.0}	{'subsample': 1.0, 'min_child_weight': 1, 'max_depth': 6, 'gamma': 0, 'colsample_bytree': 1.0}	{'subsample': 1.0, 'min_child_weight': 1, 'max_depth': 6, 'gamma': 0, 'colsample_bytree': 1.0}	{'subsample': 1.0, 'min_child_weight': 1, 'max_depth': 6, 'gamma': 0, 'colsample_bytree': 1.0}	{'subsample': 1.0, 'min_child_weight': 1, 'max_depth': 6, 'gamma': 0, 'colsample_bytree': 1.0}	{'subsample': 1.0, 'min_child_weight': 1, 'max_depth': 6, 'gamma': 0, 'colsample_bytree': 1.0}
	XGBoost	3	1	{'subsample': 0.8, 'min_child_weight': 10, 'max_depth': 6, 'gamma': 0, 'colsample_bytree': 0.6}	{'subsample': 1.0, 'min_child_weight': 1, 'max_depth': 6, 'gamma': 0, 'colsample_bytree': 1.0}	{'subsample': 1.0, 'min_child_weight': 1, 'max_depth': 6, 'gamma': 0, 'colsample_bytree': 1.0}	{'subsample': 1.0, 'min_child_weight': 1, 'max_depth': 6, 'gamma': 0, 'colsample_bytree': 1.0}	{'subsample': 1.0, 'min_child_weight': 1, 'max_depth': 6, 'gamma': 0, 'colsample_bytree': 1.0}	{'subsample': 0.6, 'min_child_weight': 10, 'max_depth': 6, 'gamma': 0.5, 'colsample_bytree': 1.0}	{'subsample': 1.0, 'min_child_weight': 1, 'max_depth': 6, 'gamma': 0, 'colsample_bytree': 1.0}	{'subsample': 1.0, 'min_child_weight': 1, 'max_depth': 6, 'gamma': 0, 'colsample_bytree': 1.0}
	XGBoost	3	2	{'subsample': 1.0, 'min_child_weight': 1, 'max_depth': 6, 'gamma': 0, 'colsample_bytree': 1.0}	{'subsample': 1.0, 'min_child_weight': 1, 'max_depth': 6, 'gamma': 0, 'colsample_bytree': 1.0}	{'subsample': 1.0, 'min_child_weight': 1, 'max_depth': 6, 'gamma': 0, 'colsample_bytree': 1.0}	{'subsample': 1.0, 'min_child_weight': 1, 'max_depth': 6, 'gamma': 0, 'colsample_bytree': 1.0}	{'subsample': 1.0, 'min_child_weight': 1, 'max_depth': 6, 'gamma': 0, 'colsample_bytree': 1.0}	{'subsample': 1.0, 'min_child_weight': 1, 'max_depth': 6, 'gamma': 0, 'colsample_bytree': 1.0}	{'subsample': 1.0, 'min_child_weight': 1, 'max_depth': 6, 'gamma': 0, 'colsample_bytree': 1.0}	{'subsample': 1.0, 'min_child_weight': 1, 'max_depth': 6, 'gamma': 0, 'colsample_bytree': 1.0}
	XGBoost	4	1	{'subsample': 1.0, 'min_child_weight': 1, 'max_depth': 6, 'gamma': 0, 'colsample_bytree': 1.0}	{'subsample': 1.0, 'min_child_weight': 1, 'max_depth': 6, 'gamma': 0, 'colsample_bytree': 1.0}	{'subsample': 1.0, 'min_child_weight': 1, 'max_depth': 6, 'gamma': 0, 'colsample_bytree': 1.0}	{'subsample': 1.0, 'min_child_weight': 1, 'max_depth': 6, 'gamma': 0, 'colsample_bytree': 1.0}	{'subsample': 1.0, 'min_child_weight': 1, 'max_depth': 6, 'gamma': 0, 'colsample_bytree': 1.0}	{'subsample': 1.0, 'min_child_weight': 1, 'max_depth': 6, 'gamma': 0, 'colsample_bytree': 1.0}	{'subsample': 1.0, 'min_child_weight': 1, 'max_depth': 6, 'gamma': 0, 'colsample_bytree': 1.0}	{'subsample': 1.0, 'min_child_weight': 1, 'max_depth': 6, 'gamma': 0, 'colsample_bytree': 1.0}
	XGBoost	4	2	{'subsample': 1.0, 'min_child_weight': 1, 'max_depth': 6, 'gamma': 0, 'colsample_bytree': 1.0}	{'subsample': 0.6, 'min_child_weight': 5, 'max_depth': 5, 'gamma': 0, 'colsample_bytree': 0.8}	{'subsample': 1.0, 'min_child_weight': 1, 'max_depth': 6, 'gamma': 0, 'colsample_bytree': 1.0}	{'subsample': 1.0, 'min_child_weight': 1, 'max_depth': 6, 'gamma': 0, 'colsample_bytree': 1.0}	{'subsample': 1.0, 'min_child_weight': 1, 'max_depth': 6, 'gamma': 0, 'colsample_bytree': 1.0}	{'subsample': 0.6, 'min_child_weight': 5, 'max_depth': 5, 'gamma': 0, 'colsample_bytree': 0.8}	{'subsample': 1.0, 'min_child_weight': 1, 'max_depth': 6, 'gamma': 0, 'colsample_bytree': 1.0}	{'subsample': 1.0, 'min_child_weight': 1, 'max_depth': 6, 'gamma': 0, 'colsample_bytree': 1.0}
	XGBoost	5	1	{'subsample': 1.0, 'min_child_weight': 1, 'max_depth': 6, 'gamma': 0, 'colsample_bytree': 1.0}	{'subsample': 1.0, 'min_child_weight': 1, 'max_depth': 6, 'gamma': 0, 'colsample_bytree': 1.0}	{'subsample': 1.0, 'min_child_weight': 1, 'max_depth': 6, 'gamma': 0, 'colsample_bytree': 1.0}	{'subsample': 1.0, 'min_child_weight': 1, 'max_depth': 6, 'gamma': 0, 'colsample_bytree': 1.0}	{'subsample': 1.0, 'min_child_weight': 1, 'max_depth': 6, 'gamma': 0, 'colsample_bytree': 1.0}	{'subsample': 1.0, 'min_child_weight': 1, 'max_depth': 6, 'gamma': 0, 'colsample_bytree': 1.0}	{'subsample': 1.0, 'min_child_weight': 1, 'max_depth': 6, 'gamma': 0, 'colsample_bytree': 1.0}	{'subsample': 1.0, 'min_child_weight': 1, 'max_depth': 6, 'gamma': 0, 'colsample_bytree': 1.0}
	XGBoost	5	2	{'subsample': 1.0, 'min_child_weight': 1, 'max_depth': 6, 'gamma': 0, 'colsample_bytree': 1.0}	{'subsample': 1.0, 'min_child_weight': 1, 'max_depth': 6, 'gamma': 0, 'colsample_bytree': 1.0}	{'subsample': 1.0, 'min_child_weight': 1, 'max_depth': 6, 'gamma': 0, 'colsample_bytree': 1.0}	{'subsample': 1.0, 'min_child_weight': 1, 'max_depth': 6, 'gamma': 0, 'colsample_bytree': 1.0}	{'subsample': 1.0, 'min_child_weight': 1, 'max_depth': 6, 'gamma': 0, 'colsample_bytree': 1.0}	{'subsample': 0.6, 'min_child_weight': 5, 'max_depth': 5, 'gamma': 0, 'colsample_bytree': 0.8}	{'subsample': 1.0, 'min_child_weight': 1, 'max_depth': 6, 'gamma': 0, 'colsample_bytree': 1.0}	{'subsample': 1.0, 'min_child_weight': 1, 'max_depth': 6, 'gamma': 0, 'colsample_bytree': 1.0}
	RF	1	1	{'n_estimators': 500}	{'n_estimators': 100}	{'n_estimators': 3000}	{'n_estimators': 500}	{'n_estimators': 1000}	{'n_estimators': 100}	{'n_estimators': 100}	{'n_estimators': 3000}
	RF	1	2	{'n_estimators': 3000}	{'n_estimators': 100}	{'n_estimators': 3000}	{'n_estimators': 1000}	{'n_estimators': 100}	{'n_estimators': 1000}	{'n_estimators': 100}	{'n_estimators': 3000}
	RF	2	1	{'n_estimators': 100}	{'n_estimators': 100}	{'n_estimators': 1000}	{'n_estimators': 3000}	{'n_estimators': 500}	{'n_estimators': 100}	{'n_estimators': 100}	{'n_estimators': 500}
	RF	2	2	{'n_estimators': 100}	{'n_estimators': 100}	{'n_estimators': 3000}	{'n_estimators': 3000}	{'n_estimators': 500}	{'n_estimators': 100}	{'n_estimators': 100}	{'n_estimators': 3000}
	RF	3	1	{'n_estimators': 1000}	{'n_estimators': 100}	{'n_estimators': 3000}	{'n_estimators': 3000}	{'n_estimators': 1000}	{'n_estimators': 3000}	{'n_estimators': 500}	{'n_estimators': 3000}
	RF	3	2	{'n_estimators': 3000}	{'n_estimators': 100}	{'n_estimators': 1000}	{'n_estimators': 3000}	{'n_estimators': 1000}	{'n_estimators': 100}	{'n_estimators': 100}	{'n_estimators': 1000}
	RF	4	1	{'n_estimators': 3000}	{'n_estimators': 100}	{'n_estimators': 500}	{'n_estimators': 3000}	{'n_estimators': 500}	{'n_estimators': 500}	{'n_estimators': 100}	{'n_estimators': 500}
	RF	4	2	{'n_estimators': 1000}	{'n_estimators': 100}	{'n_estimators': 3000}	{'n_estimators': 1000}	{'n_estimators': 500}	{'n_estimators': 100}	{'n_estimators': 100}	{'n_estimators': 3000}
	RF	5	1	{'n_estimators': 3000}	{'n_estimators': 100}	{'n_estimators': 3000}	{'n_estimators': 3000}	{'n_estimators': 100}	{'n_estimators': 100}	{'n_estimators': 100}	{'n_estimators': 3000}
	RF	5	2	{'n_estimators': 500}	{'n_estimators': 100}	{'n_estimators': 500}	{'n_estimators': 3000}	{'n_estimators': 1000}	{'n_estimators': 100}	{'n_estimators': 100}	{'n_estimators': 3000}
	SVM	1	1	{'gamma': 0.01, 'C': 0.1}	{'gamma': 1.0, 'C': 10}	{'gamma': 1.0, 'C': 10}	{'gamma': 1.0, 'C': 10}	{'gamma': 0.01, 'C': 1}	{'gamma': 0.01, 'C': 1}	{'gamma': 1.0, 'C': 10}	{'gamma': 1.0, 'C': 10}
	SVM	1	2	{'gamma': 0.01, 'C': 1}	{'gamma': 1.0, 'C': 10}	{'gamma': 1.0, 'C': 10}	{'gamma': 1.0, 'C': 10}	{'gamma': 1.0, 'C': 10}	{'gamma': 0.01, 'C': 1}	{'gamma': 1.0, 'C': 10}	{'gamma': 1.0, 'C': 10}
	SVM	2	1	{'gamma': 1.0, 'C': 10}	{'gamma': 1.0, 'C': 10}	{'gamma': 1.0, 'C': 10}	{'gamma': 1.0, 'C': 10}	{'gamma': 0.01, 'C': 1}	{'gamma': 0.01, 'C': 0.1}	{'gamma': 1.0, 'C': 10}	{'gamma': 1.0, 'C': 10}
	SVM	2	2	{'gamma': 1.0, 'C': 10}	{'gamma': 1.0, 'C': 10}	{'gamma': 1.0, 'C': 10}	{'gamma': 1.0, 'C': 10}	{'gamma': 1.0, 'C': 10}	{'gamma': 0.01, 'C': 0.1}	{'gamma': 1.0, 'C': 10}	{'gamma': 1.0, 'C': 10}
	SVM	3	1	{'gamma': 1.0, 'C': 10}	{'gamma': 1.0, 'C': 10}	{'gamma': 1.0, 'C': 10}	{'gamma': 1.0, 'C': 10}	{'gamma': 0.01, 'C': 1}	{'gamma': 0.01, 'C': 1}	{'gamma': 1.0, 'C': 10}	{'gamma': 1.0, 'C': 10}
	SVM	3	2	{'gamma': 1.0, 'C': 10}	{'gamma': 1.0, 'C': 10}	{'gamma': 1.0, 'C': 10}	{'gamma': 1.0, 'C': 10}	{'gamma': 0.01, 'C': 1}	{'gamma': 0.01, 'C': 0.1}	{'gamma': 1.0, 'C': 10}	{'gamma': 1.0, 'C': 10}
	SVM	4	1	{'gamma': 1.0, 'C': 10}	{'gamma': 1.0, 'C': 10}	{'gamma': 1.0, 'C': 10}	{'gamma': 1.0, 'C': 10}	{'gamma': 1.0, 'C': 10}	{'gamma': 0.01, 'C': 1}	{'gamma': 1.0, 'C': 10}	{'gamma': 1.0, 'C': 10}
	SVM	4	2	{'gamma': 1.0, 'C': 10}	{'gamma': 1.0, 'C': 10}	{'gamma': 1.0, 'C': 10}	{'gamma': 1.0, 'C': 10}	{'gamma': 1.0, 'C': 10}	{'gamma': 0.01, 'C': 0.1}	{'gamma': 1.0, 'C': 10}	{'gamma': 1.0, 'C': 10}
	SVM	5	1	{'gamma': 1.0, 'C': 10}	{'gamma': 1.0, 'C': 10}	{'gamma': 1.0, 'C': 10}	{'gamma': 1.0, 'C': 10}	{'gamma': 0.01, 'C': 1}	{'gamma': 0.01, 'C': 1}	{'gamma': 1.0, 'C': 10}	{'gamma': 1.0, 'C': 10}
	SVM	5	2	{'gamma': 1.0, 'C': 10}	{'gamma': 1.0, 'C': 10}	{'gamma': 1.0, 'C': 10}	{'gamma': 1.0, 'C': 10}	{'gamma': 1.0, 'C': 10}	{'gamma': 0.01, 'C': 1}	{'gamma': 1.0, 'C': 10}	{'gamma': 1.0, 'C': 10}
	LDA	1	1
	LDA	1	2
	LDA	2	1
	LDA	2	2
	LDA	3	1
	LDA	3	2
	LDA	4	1
	LDA	4	2
	LDA	5	1
	LDA	5	2
	Lasso	1	1	{'C': 10}	{'C': 1}	{'C': 1}	{'C': 10}	{'C': 1}	{'C': 10}	{'C': 10}	{'C': 1}
	Lasso	1	2	{'C': 10}	{'C': 1}	{'C': 10}	{'C': 10}	{'C': 10}	{'C': 10}	{'C': 10}	{'C': 10}
	Lasso	2	1	{'C': 10}	{'C': 10}	{'C': 10}	{'C': 1}	{'C': 1}	{'C': 10}	{'C': 1}	{'C': 10}
	Lasso	2	2	{'C': 10}	{'C': 1}	{'C': 10}	{'C': 10}	{'C': 1}	{'C': 10}	{'C': 10}	{'C': 10}
	Lasso	3	1	{'C': 10}	{'C': 10}	{'C': 10}	{'C': 10}	{'C': 1}	{'C': 10}	{'C': 10}	{'C': 10}
	Lasso	3	2	{'C': 1}	{'C': 10}	{'C': 1}	{'C': 0.1}	{'C': 10}	{'C': 1}	{'C': 10}	{'C': 1}
	Lasso	4	1	{'C': 10}	{'C': 10}	{'C': 10}	{'C': 1}	{'C': 10}	{'C': 10}	{'C': 1}	{'C': 10}
	Lasso	4	2	{'C': 10}	{'C': 10}	{'C': 1}	{'C': 10}	{'C': 1}	{'C': 10}	{'C': 1}	{'C': 1}
	Lasso	5	1	{'C': 10}	{'C': 1}	{'C': 10}	{'C': 10}	{'C': 10}	{'C': 0.1}	{'C': 10}	{'C': 10}
	Lasso	5	2	{'C': 10}	{'C': 10}	{'C': 10}	{'C': 10}	{'C': 1}	{'C': 10}	{'C': 1}	{'C': 10}
	Ridge	1	1	{'C': 10}	{'C': 1}	{'C': 1}	{'C': 10}	{'C': 1}	{'C': 0.1}	{'C': 10}	{'C': 1}
	Ridge	1	2	{'C': 10}	{'C': 10}	{'C': 10}	{'C': 10}	{'C': 10}	{'C': 1}	{'C': 0.1}	{'C': 10}
	Ridge	2	1	{'C': 10}	{'C': 10}	{'C': 10}	{'C': 1}	{'C': 10}	{'C': 10}	{'C': 1}	{'C': 10}
	Ridge	2	2	{'C': 10}	{'C': 10}	{'C': 10}	{'C': 10}	{'C': 0.1}	{'C': 10}	{'C': 10}	{'C': 10}
	Ridge	3	1	{'C': 10}	{'C': 10}	{'C': 10}	{'C': 10}	{'C': 1}	{'C': 10}	{'C': 10}	{'C': 10}
	Ridge	3	2	{'C': 0.1}	{'C': 1}	{'C': 1}	{'C': 10}	{'C': 1}	{'C': 0.1}	{'C': 0.1}	{'C': 1}
	Ridge	4	1	{'C': 10}	{'C': 10}	{'C': 10}	{'C': 1}	{'C': 10}	{'C': 1}	{'C': 1}	{'C': 10}
	Ridge	4	2	{'C': 10}	{'C': 10}	{'C': 1}	{'C': 10}	{'C': 1}	{'C': 1}	{'C': 1}	{'C': 1}
	Ridge	5	1	{'C': 10}	{'C': 1}	{'C': 10}	{'C': 10}	{'C': 1}	{'C': 10}	{'C': 10}	{'C': 10}
	Ridge	5	2	{'C': 10}	{'C': 10}	{'C': 10}	{'C': 10}	{'C': 1}	{'C': 10}	{'C': 10}	{'C': 10}
	ElasticNet	1	1	{'C': 10}	{'C': 1}	{'C': 1}	{'C': 1}	{'C': 1}	{'C': 1}	{'C': 10}	{'C': 1}
	ElasticNet	1	2	{'C': 10}	{'C': 10}	{'C': 10}	{'C': 10}	{'C': 10}	{'C': 1}	{'C': 10}	{'C': 10}
	ElasticNet	2	1	{'C': 10}	{'C': 10}	{'C': 10}	{'C': 1}	{'C': 1}	{'C': 10}	{'C': 10}	{'C': 10}
	ElasticNet	2	2	{'C': 1}	{'C': 1}	{'C': 10}	{'C': 10}	{'C': 1}	{'C': 10}	{'C': 10}	{'C': 10}
	ElasticNet	3	1	{'C': 10}	{'C': 10}	{'C': 10}	{'C': 10}	{'C': 1}	{'C': 10}	{'C': 10}	{'C': 10}
	ElasticNet	3	2	{'C': 1}	{'C': 10}	{'C': 1}	{'C': 1}	{'C': 10}	{'C': 1}	{'C': 1}	{'C': 1}
	ElasticNet	4	1	{'C': 10}	{'C': 10}	{'C': 10}	{'C': 1}	{'C': 10}	{'C': 10}	{'C': 1}	{'C': 10}
	ElasticNet	4	2	{'C': 10}	{'C': 10}	{'C': 10}	{'C': 10}	{'C': 1}	{'C': 1}	{'C': 1}	{'C': 10}
	ElasticNet	5	1	{'C': 10}	{'C': 10}	{'C': 10}	{'C': 10}	{'C': 1}	{'C': 0.1}	{'C': 1}	{'C': 10}
	ElasticNet	5	2	{'C': 10}	{'C': 10}	{'C': 10}	{'C': 10}	{'C': 1}	{'C': 10}	{'C': 10}	{'C': 10}

## Sheet: 5. Abalone_over20
	Algorithm	Iteration	Fold	Without Sampling	O_Random	O_SMOTE	O_Border	U_Random	U_Condensed	U_NearMiss	SMOTETomek
	AdaBoost	1	1	{'n_estimators': 500, 'learning_rate': 0.01}	{'n_estimators': 50, 'learning_rate': 1.0}	{'n_estimators': 50, 'learning_rate': 1.0}	{'n_estimators': 50, 'learning_rate': 1.0}	{'n_estimators': 500, 'learning_rate': 0.01}	{'n_estimators': 500, 'learning_rate': 0.01}	{'n_estimators': 50, 'learning_rate': 1.0}	{'n_estimators': 50, 'learning_rate': 1.0}
	AdaBoost	1	2	{'n_estimators': 500, 'learning_rate': 0.01}	{'n_estimators': 50, 'learning_rate': 1.0}	{'n_estimators': 50, 'learning_rate': 1.0}	{'n_estimators': 50, 'learning_rate': 1.0}	{'n_estimators': 50, 'learning_rate': 1.0}	{'n_estimators': 500, 'learning_rate': 0.01}	{'n_estimators': 50, 'learning_rate': 1.0}	{'n_estimators': 50, 'learning_rate': 1.0}
	AdaBoost	2	1	{'n_estimators': 500, 'learning_rate': 0.01}	{'n_estimators': 50, 'learning_rate': 1.0}	{'n_estimators': 50, 'learning_rate': 1.0}	{'n_estimators': 50, 'learning_rate': 1.0}	{'n_estimators': 500, 'learning_rate': 0.01}	{'n_estimators': 500, 'learning_rate': 0.01}	{'n_estimators': 500, 'learning_rate': 0.01}	{'n_estimators': 50, 'learning_rate': 1.0}
	AdaBoost	2	2	{'n_estimators': 500, 'learning_rate': 0.01}	{'n_estimators': 50, 'learning_rate': 1.0}	{'n_estimators': 50, 'learning_rate': 1.0}	{'n_estimators': 50, 'learning_rate': 1.0}	{'n_estimators': 500, 'learning_rate': 0.01}	{'n_estimators': 50, 'learning_rate': 1.0}	{'n_estimators': 50, 'learning_rate': 1.0}	{'n_estimators': 50, 'learning_rate': 1.0}
	AdaBoost	3	1	{'n_estimators': 500, 'learning_rate': 0.01}	{'n_estimators': 50, 'learning_rate': 1.0}	{'n_estimators': 50, 'learning_rate': 1.0}	{'n_estimators': 50, 'learning_rate': 1.0}	{'n_estimators': 50, 'learning_rate': 1.0}	{'n_estimators': 500, 'learning_rate': 0.01}	{'n_estimators': 10, 'learning_rate': 1.0}	{'n_estimators': 50, 'learning_rate': 1.0}
	AdaBoost	3	2	{'n_estimators': 50, 'learning_rate': 1.0}	{'n_estimators': 50, 'learning_rate': 1.0}	{'n_estimators': 50, 'learning_rate': 1.0}	{'n_estimators': 50, 'learning_rate': 1.0}	{'n_estimators': 500, 'learning_rate': 0.01}	{'n_estimators': 10, 'learning_rate': 1.0}	{'n_estimators': 500, 'learning_rate': 0.01}	{'n_estimators': 50, 'learning_rate': 1.0}
	AdaBoost	4	1	{'n_estimators': 500, 'learning_rate': 0.01}	{'n_estimators': 50, 'learning_rate': 1.0}	{'n_estimators': 50, 'learning_rate': 1.0}	{'n_estimators': 50, 'learning_rate': 1.0}	{'n_estimators': 500, 'learning_rate': 0.01}	{'n_estimators': 500, 'learning_rate': 0.01}	{'n_estimators': 500, 'learning_rate': 0.01}	{'n_estimators': 50, 'learning_rate': 1.0}
	AdaBoost	4	2	{'n_estimators': 50, 'learning_rate': 1.0}	{'n_estimators': 50, 'learning_rate': 1.0}	{'n_estimators': 50, 'learning_rate': 1.0}	{'n_estimators': 50, 'learning_rate': 1.0}	{'n_estimators': 50, 'learning_rate': 1.0}	{'n_estimators': 50, 'learning_rate': 1.0}	{'n_estimators': 10, 'learning_rate': 1.0}	{'n_estimators': 50, 'learning_rate': 1.0}
	AdaBoost	5	1	{'n_estimators': 10, 'learning_rate': 1.0}	{'n_estimators': 50, 'learning_rate': 1.0}	{'n_estimators': 50, 'learning_rate': 1.0}	{'n_estimators': 50, 'learning_rate': 1.0}	{'n_estimators': 10, 'learning_rate': 1.0}	{'n_estimators': 10, 'learning_rate': 1.0}	{'n_estimators': 50, 'learning_rate': 1.0}	{'n_estimators': 50, 'learning_rate': 1.0}
	AdaBoost	5	2	{'n_estimators': 500, 'learning_rate': 0.01}	{'n_estimators': 50, 'learning_rate': 1.0}	{'n_estimators': 50, 'learning_rate': 1.0}	{'n_estimators': 500, 'learning_rate': 0.01}	{'n_estimators': 500, 'learning_rate': 0.01}	{'n_estimators': 50, 'learning_rate': 1.0}	{'n_estimators': 500, 'learning_rate': 0.01}	{'n_estimators': 50, 'learning_rate': 1.0}
	XGBoost	1	1	{'subsample': 0.8, 'min_child_weight': 10, 'max_depth': 6, 'gamma': 0, 'colsample_bytree': 0.6}	{'subsample': 1.0, 'min_child_weight': 1, 'max_depth': 6, 'gamma': 0, 'colsample_bytree': 1.0}	{'subsample': 1.0, 'min_child_weight': 1, 'max_depth': 6, 'gamma': 0, 'colsample_bytree': 1.0}	{'subsample': 1.0, 'min_child_weight': 1, 'max_depth': 6, 'gamma': 0, 'colsample_bytree': 1.0}	{'subsample': 1.0, 'min_child_weight': 1, 'max_depth': 6, 'gamma': 0, 'colsample_bytree': 1.0}	{'subsample': 0.6, 'min_child_weight': 5, 'max_depth': 5, 'gamma': 0, 'colsample_bytree': 0.8}	{'subsample': 1.0, 'min_child_weight': 1, 'max_depth': 6, 'gamma': 0, 'colsample_bytree': 1.0}	{'subsample': 1.0, 'min_child_weight': 1, 'max_depth': 6, 'gamma': 0, 'colsample_bytree': 1.0}
	XGBoost	1	2	{'subsample': 0.6, 'min_child_weight': 10, 'max_depth': 6, 'gamma': 0.5, 'colsample_bytree': 1.0}	{'subsample': 1.0, 'min_child_weight': 1, 'max_depth': 6, 'gamma': 0, 'colsample_bytree': 1.0}	{'subsample': 1.0, 'min_child_weight': 1, 'max_depth': 6, 'gamma': 0, 'colsample_bytree': 1.0}	{'subsample': 1.0, 'min_child_weight': 1, 'max_depth': 6, 'gamma': 0, 'colsample_bytree': 1.0}	{'subsample': 1.0, 'min_child_weight': 1, 'max_depth': 6, 'gamma': 0, 'colsample_bytree': 1.0}	{'subsample': 0.6, 'min_child_weight': 5, 'max_depth': 5, 'gamma': 0, 'colsample_bytree': 0.8}	{'subsample': 1.0, 'min_child_weight': 1, 'max_depth': 6, 'gamma': 0, 'colsample_bytree': 1.0}	{'subsample': 1.0, 'min_child_weight': 1, 'max_depth': 6, 'gamma': 0, 'colsample_bytree': 1.0}
	XGBoost	2	1	{'subsample': 0.6, 'min_child_weight': 5, 'max_depth': 5, 'gamma': 0, 'colsample_bytree': 0.8}	{'subsample': 1.0, 'min_child_weight': 1, 'max_depth': 6, 'gamma': 0, 'colsample_bytree': 1.0}	{'subsample': 1.0, 'min_child_weight': 1, 'max_depth': 6, 'gamma': 0, 'colsample_bytree': 1.0}	{'subsample': 1.0, 'min_child_weight': 1, 'max_depth': 6, 'gamma': 0, 'colsample_bytree': 1.0}	{'subsample': 1.0, 'min_child_weight': 1, 'max_depth': 6, 'gamma': 0, 'colsample_bytree': 1.0}	{'subsample': 0.6, 'min_child_weight': 5, 'max_depth': 5, 'gamma': 0, 'colsample_bytree': 0.8}	{'subsample': 1.0, 'min_child_weight': 1, 'max_depth': 6, 'gamma': 0, 'colsample_bytree': 1.0}	{'subsample': 1.0, 'min_child_weight': 1, 'max_depth': 6, 'gamma': 0, 'colsample_bytree': 1.0}
	XGBoost	2	2	{'subsample': 0.6, 'min_child_weight': 5, 'max_depth': 5, 'gamma': 0, 'colsample_bytree': 0.8}	{'subsample': 1.0, 'min_child_weight': 1, 'max_depth': 6, 'gamma': 0, 'colsample_bytree': 1.0}	{'subsample': 1.0, 'min_child_weight': 1, 'max_depth': 6, 'gamma': 0, 'colsample_bytree': 1.0}	{'subsample': 1.0, 'min_child_weight': 1, 'max_depth': 6, 'gamma': 0, 'colsample_bytree': 1.0}	{'subsample': 1.0, 'min_child_weight': 1, 'max_depth': 6, 'gamma': 0, 'colsample_bytree': 1.0}	{'subsample': 0.6, 'min_child_weight': 5, 'max_depth': 5, 'gamma': 0, 'colsample_bytree': 0.8}	{'subsample': 1.0, 'min_child_weight': 1, 'max_depth': 6, 'gamma': 0, 'colsample_bytree': 1.0}	{'subsample': 1.0, 'min_child_weight': 1, 'max_depth': 6, 'gamma': 0, 'colsample_bytree': 1.0}
	XGBoost	3	1	{'subsample': 0.6, 'min_child_weight': 5, 'max_depth': 5, 'gamma': 0, 'colsample_bytree': 0.8}	{'subsample': 1.0, 'min_child_weight': 1, 'max_depth': 6, 'gamma': 0, 'colsample_bytree': 1.0}	{'subsample': 1.0, 'min_child_weight': 1, 'max_depth': 6, 'gamma': 0, 'colsample_bytree': 1.0}	{'subsample': 1.0, 'min_child_weight': 1, 'max_depth': 6, 'gamma': 0, 'colsample_bytree': 1.0}	{'subsample': 1.0, 'min_child_weight': 1, 'max_depth': 6, 'gamma': 0, 'colsample_bytree': 1.0}	{'subsample': 0.6, 'min_child_weight': 5, 'max_depth': 5, 'gamma': 0, 'colsample_bytree': 0.8}	{'subsample': 1.0, 'min_child_weight': 1, 'max_depth': 6, 'gamma': 0, 'colsample_bytree': 1.0}	{'subsample': 1.0, 'min_child_weight': 1, 'max_depth': 6, 'gamma': 0, 'colsample_bytree': 1.0}
	XGBoost	3	2	{'subsample': 0.8, 'min_child_weight': 10, 'max_depth': 6, 'gamma': 0, 'colsample_bytree': 0.6}	{'subsample': 1.0, 'min_child_weight': 1, 'max_depth': 6, 'gamma': 0, 'colsample_bytree': 1.0}	{'subsample': 1.0, 'min_child_weight': 1, 'max_depth': 6, 'gamma': 0, 'colsample_bytree': 1.0}	{'subsample': 1.0, 'min_child_weight': 1, 'max_depth': 6, 'gamma': 0, 'colsample_bytree': 1.0}	{'subsample': 1.0, 'min_child_weight': 1, 'max_depth': 6, 'gamma': 0, 'colsample_bytree': 1.0}	{'subsample': 0.6, 'min_child_weight': 5, 'max_depth': 5, 'gamma': 0, 'colsample_bytree': 0.8}	{'subsample': 1.0, 'min_child_weight': 1, 'max_depth': 6, 'gamma': 0, 'colsample_bytree': 1.0}	{'subsample': 1.0, 'min_child_weight': 1, 'max_depth': 6, 'gamma': 0, 'colsample_bytree': 1.0}
	XGBoost	4	1	{'subsample': 0.8, 'min_child_weight': 10, 'max_depth': 6, 'gamma': 0, 'colsample_bytree': 0.6}	{'subsample': 1.0, 'min_child_weight': 1, 'max_depth': 6, 'gamma': 0, 'colsample_bytree': 1.0}	{'subsample': 1.0, 'min_child_weight': 1, 'max_depth': 6, 'gamma': 0, 'colsample_bytree': 1.0}	{'subsample': 1.0, 'min_child_weight': 1, 'max_depth': 6, 'gamma': 0, 'colsample_bytree': 1.0}	{'subsample': 1.0, 'min_child_weight': 1, 'max_depth': 6, 'gamma': 0, 'colsample_bytree': 1.0}	{'subsample': 0.6, 'min_child_weight': 5, 'max_depth': 5, 'gamma': 0, 'colsample_bytree': 0.8}	{'subsample': 1.0, 'min_child_weight': 1, 'max_depth': 6, 'gamma': 0, 'colsample_bytree': 1.0}	{'subsample': 1.0, 'min_child_weight': 1, 'max_depth': 6, 'gamma': 0, 'colsample_bytree': 1.0}
	XGBoost	4	2	{'subsample': 0.6, 'min_child_weight': 5, 'max_depth': 5, 'gamma': 0, 'colsample_bytree': 0.8}	{'subsample': 1.0, 'min_child_weight': 1, 'max_depth': 6, 'gamma': 0, 'colsample_bytree': 1.0}	{'subsample': 1.0, 'min_child_weight': 1, 'max_depth': 6, 'gamma': 0, 'colsample_bytree': 1.0}	{'subsample': 1.0, 'min_child_weight': 1, 'max_depth': 6, 'gamma': 0, 'colsample_bytree': 1.0}	{'subsample': 1.0, 'min_child_weight': 1, 'max_depth': 6, 'gamma': 0, 'colsample_bytree': 1.0}	{'subsample': 0.6, 'min_child_weight': 5, 'max_depth': 5, 'gamma': 0, 'colsample_bytree': 0.8}	{'subsample': 1.0, 'min_child_weight': 1, 'max_depth': 6, 'gamma': 0, 'colsample_bytree': 1.0}	{'subsample': 1.0, 'min_child_weight': 1, 'max_depth': 6, 'gamma': 0, 'colsample_bytree': 1.0}
	XGBoost	5	1	{'subsample': 1.0, 'min_child_weight': 1, 'max_depth': 6, 'gamma': 0, 'colsample_bytree': 1.0}	{'subsample': 1.0, 'min_child_weight': 1, 'max_depth': 6, 'gamma': 0, 'colsample_bytree': 1.0}	{'subsample': 1.0, 'min_child_weight': 1, 'max_depth': 6, 'gamma': 0, 'colsample_bytree': 1.0}	{'subsample': 1.0, 'min_child_weight': 1, 'max_depth': 6, 'gamma': 0, 'colsample_bytree': 1.0}	{'subsample': 1.0, 'min_child_weight': 1, 'max_depth': 6, 'gamma': 0, 'colsample_bytree': 1.0}	{'subsample': 1.0, 'min_child_weight': 1, 'max_depth': 6, 'gamma': 0, 'colsample_bytree': 1.0}	{'subsample': 1.0, 'min_child_weight': 1, 'max_depth': 6, 'gamma': 0, 'colsample_bytree': 1.0}	{'subsample': 1.0, 'min_child_weight': 1, 'max_depth': 6, 'gamma': 0, 'colsample_bytree': 1.0}
	XGBoost	5	2	{'subsample': 0.6, 'min_child_weight': 5, 'max_depth': 5, 'gamma': 0, 'colsample_bytree': 0.8}	{'subsample': 1.0, 'min_child_weight': 1, 'max_depth': 6, 'gamma': 0, 'colsample_bytree': 1.0}	{'subsample': 1.0, 'min_child_weight': 1, 'max_depth': 6, 'gamma': 0, 'colsample_bytree': 1.0}	{'subsample': 1.0, 'min_child_weight': 1, 'max_depth': 6, 'gamma': 0, 'colsample_bytree': 1.0}	{'subsample': 1.0, 'min_child_weight': 1, 'max_depth': 6, 'gamma': 0, 'colsample_bytree': 1.0}	{'subsample': 0.6, 'min_child_weight': 5, 'max_depth': 5, 'gamma': 0, 'colsample_bytree': 0.8}	{'subsample': 1.0, 'min_child_weight': 1, 'max_depth': 6, 'gamma': 0, 'colsample_bytree': 1.0}	{'subsample': 1.0, 'min_child_weight': 1, 'max_depth': 6, 'gamma': 0, 'colsample_bytree': 1.0}
	RF	1	1	{'n_estimators': 1000}	{'n_estimators': 100}	{'n_estimators': 3000}	{'n_estimators': 3000}	{'n_estimators': 500}	{'n_estimators': 1000}	{'n_estimators': 100}	{'n_estimators': 3000}
	RF	1	2	{'n_estimators': 500}	{'n_estimators': 100}	{'n_estimators': 3000}	{'n_estimators': 3000}	{'n_estimators': 3000}	{'n_estimators': 100}	{'n_estimators': 500}	{'n_estimators': 3000}
	RF	2	1	{'n_estimators': 3000}	{'n_estimators': 100}	{'n_estimators': 500}	{'n_estimators': 3000}	{'n_estimators': 3000}	{'n_estimators': 100}	{'n_estimators': 500}	{'n_estimators': 500}
	RF	2	2	{'n_estimators': 3000}	{'n_estimators': 100}	{'n_estimators': 1000}	{'n_estimators': 1000}	{'n_estimators': 100}	{'n_estimators': 3000}	{'n_estimators': 1000}	{'n_estimators': 1000}
	RF	3	1	{'n_estimators': 3000}	{'n_estimators': 100}	{'n_estimators': 3000}	{'n_estimators': 500}	{'n_estimators': 3000}	{'n_estimators': 3000}	{'n_estimators': 500}	{'n_estimators': 3000}
	RF	3	2	{'n_estimators': 3000}	{'n_estimators': 100}	{'n_estimators': 3000}	{'n_estimators': 3000}	{'n_estimators': 100}	{'n_estimators': 500}	{'n_estimators': 500}	{'n_estimators': 3000}
	RF	4	1	{'n_estimators': 500}	{'n_estimators': 100}	{'n_estimators': 3000}	{'n_estimators': 3000}	{'n_estimators': 500}	{'n_estimators': 3000}	{'n_estimators': 100}	{'n_estimators': 3000}
	RF	4	2	{'n_estimators': 500}	{'n_estimators': 100}	{'n_estimators': 1000}	{'n_estimators': 500}	{'n_estimators': 100}	{'n_estimators': 1000}	{'n_estimators': 500}	{'n_estimators': 1000}
	RF	5	1	{'n_estimators': 500}	{'n_estimators': 100}	{'n_estimators': 500}	{'n_estimators': 500}	{'n_estimators': 100}	{'n_estimators': 100}	{'n_estimators': 3000}	{'n_estimators': 500}
	RF	5	2	{'n_estimators': 1000}	{'n_estimators': 100}	{'n_estimators': 500}	{'n_estimators': 3000}	{'n_estimators': 1000}	{'n_estimators': 1000}	{'n_estimators': 500}	{'n_estimators': 500}
	SVM	1	1	{'gamma': 1.0, 'C': 10}	{'gamma': 1.0, 'C': 10}	{'gamma': 1.0, 'C': 10}	{'gamma': 1.0, 'C': 10}	{'gamma': 1.0, 'C': 10}	{'gamma': 0.01, 'C': 1}	{'gamma': 1.0, 'C': 10}	{'gamma': 1.0, 'C': 10}
	SVM	1	2	{'gamma': 0.01, 'C': 1}	{'gamma': 1.0, 'C': 10}	{'gamma': 1.0, 'C': 10}	{'gamma': 1.0, 'C': 10}	{'gamma': 0.01, 'C': 1}	{'gamma': 0.01, 'C': 1}	{'gamma': 1.0, 'C': 10}	{'gamma': 1.0, 'C': 10}
	SVM	2	1	{'gamma': 0.01, 'C': 1}	{'gamma': 1.0, 'C': 10}	{'gamma': 1.0, 'C': 10}	{'gamma': 1.0, 'C': 10}	{'gamma': 1.0, 'C': 10}	{'gamma': 0.01, 'C': 0.1}	{'gamma': 1.0, 'C': 10}	{'gamma': 1.0, 'C': 10}
	SVM	2	2	{'gamma': 0.01, 'C': 0.1}	{'gamma': 1.0, 'C': 10}	{'gamma': 1.0, 'C': 10}	{'gamma': 1.0, 'C': 10}	{'gamma': 1.0, 'C': 10}	{'gamma': 0.01, 'C': 1}	{'gamma': 1.0, 'C': 10}	{'gamma': 1.0, 'C': 10}
	SVM	3	1	{'gamma': 0.01, 'C': 1}	{'gamma': 1.0, 'C': 10}	{'gamma': 1.0, 'C': 10}	{'gamma': 1.0, 'C': 10}	{'gamma': 1.0, 'C': 10}	{'gamma': 0.01, 'C': 1}	{'gamma': 1.0, 'C': 10}	{'gamma': 1.0, 'C': 10}
	SVM	3	2	{'gamma': 0.01, 'C': 1}	{'gamma': 1.0, 'C': 10}	{'gamma': 1.0, 'C': 10}	{'gamma': 1.0, 'C': 10}	{'gamma': 0.01, 'C': 1}	{'gamma': 0.01, 'C': 0.1}	{'gamma': 1.0, 'C': 10}	{'gamma': 1.0, 'C': 10}
	SVM	4	1	{'gamma': 0.01, 'C': 1}	{'gamma': 1.0, 'C': 10}	{'gamma': 1.0, 'C': 10}	{'gamma': 1.0, 'C': 10}	{'gamma': 1.0, 'C': 10}	{'gamma': 0.01, 'C': 1}	{'gamma': 1.0, 'C': 10}	{'gamma': 1.0, 'C': 10}
	SVM	4	2	{'gamma': 0.01, 'C': 0.1}	{'gamma': 1.0, 'C': 10}	{'gamma': 1.0, 'C': 10}	{'gamma': 1.0, 'C': 10}	{'gamma': 1.0, 'C': 10}	{'gamma': 0.01, 'C': 1}	{'gamma': 1.0, 'C': 10}	{'gamma': 1.0, 'C': 10}
	SVM	5	1	{'gamma': 0.01, 'C': 1}	{'gamma': 1.0, 'C': 10}	{'gamma': 1.0, 'C': 10}	{'gamma': 1.0, 'C': 10}	{'gamma': 0.01, 'C': 1}	{'gamma': 0.01, 'C': 1}	{'gamma': 1.0, 'C': 10}	{'gamma': 1.0, 'C': 10}
	SVM	5	2	{'gamma': 0.01, 'C': 1}	{'gamma': 1.0, 'C': 10}	{'gamma': 1.0, 'C': 10}	{'gamma': 1.0, 'C': 10}	{'gamma': 1.0, 'C': 10}	{'gamma': 0.01, 'C': 1}	{'gamma': 1.0, 'C': 10}	{'gamma': 1.0, 'C': 10}
	LDA	1	1
	LDA	1	2
	LDA	2	1
	LDA	2	2
	LDA	3	1
	LDA	3	2
	LDA	4	1
	LDA	4	2
	LDA	5	1
	LDA	5	2
	Lasso	1	1	{'C': 1}	{'C': 1}	{'C': 10}	{'C': 1}	{'C': 10}	{'C': 10}	{'C': 10}	{'C': 10}
	Lasso	1	2	{'C': 1}	{'C': 1}	{'C': 10}	{'C': 0.1}	{'C': 10}	{'C': 1}	{'C': 1}	{'C': 10}
	Lasso	2	1	{'C': 10}	{'C': 1}	{'C': 10}	{'C': 10}	{'C': 10}	{'C': 1}	{'C': 10}	{'C': 10}
	Lasso	2	2	{'C': 10}	{'C': 1}	{'C': 1}	{'C': 10}	{'C': 10}	{'C': 10}	{'C': 10}	{'C': 1}
	Lasso	3	1	{'C': 10}	{'C': 10}	{'C': 10}	{'C': 10}	{'C': 10}	{'C': 10}	{'C': 1}	{'C': 10}
	Lasso	3	2	{'C': 10}	{'C': 1}	{'C': 10}	{'C': 10}	{'C': 10}	{'C': 10}	{'C': 10}	{'C': 10}
	Lasso	4	1	{'C': 10}	{'C': 10}	{'C': 10}	{'C': 10}	{'C': 10}	{'C': 1}	{'C': 10}	{'C': 10}
	Lasso	4	2	{'C': 1}	{'C': 1}	{'C': 1}	{'C': 1}	{'C': 1}	{'C': 10}	{'C': 10}	{'C': 1}
	Lasso	5	1	{'C': 10}	{'C': 1}	{'C': 1}	{'C': 10}	{'C': 10}	{'C': 10}	{'C': 10}	{'C': 1}
	Lasso	5	2	{'C': 10}	{'C': 1}	{'C': 10}	{'C': 10}	{'C': 10}	{'C': 1}	{'C': 10}	{'C': 10}
	Ridge	1	1	{'C': 10}	{'C': 10}	{'C': 10}	{'C': 10}	{'C': 10}	{'C': 10}	{'C': 10}	{'C': 10}
	Ridge	1	2	{'C': 1}	{'C': 1}	{'C': 1}	{'C': 1}	{'C': 10}	{'C': 1}	{'C': 1}	{'C': 1}
	Ridge	2	1	{'C': 1}	{'C': 10}	{'C': 10}	{'C': 10}	{'C': 10}	{'C': 10}	{'C': 10}	{'C': 10}
	Ridge	2	2	{'C': 10}	{'C': 10}	{'C': 10}	{'C': 10}	{'C': 10}	{'C': 10}	{'C': 1}	{'C': 10}
	Ridge	3	1	{'C': 10}	{'C': 10}	{'C': 1}	{'C': 10}	{'C': 10}	{'C': 10}	{'C': 1}	{'C': 1}
	Ridge	3	2	{'C': 10}	{'C': 10}	{'C': 10}	{'C': 10}	{'C': 10}	{'C': 10}	{'C': 1}	{'C': 10}
	Ridge	4	1	{'C': 10}	{'C': 10}	{'C': 10}	{'C': 10}	{'C': 10}	{'C': 1}	{'C': 10}	{'C': 10}
	Ridge	4	2	{'C': 1}	{'C': 10}	{'C': 10}	{'C': 1}	{'C': 10}	{'C': 10}	{'C': 1}	{'C': 10}
	Ridge	5	1	{'C': 10}	{'C': 10}	{'C': 10}	{'C': 10}	{'C': 10}	{'C': 10}	{'C': 10}	{'C': 10}
	Ridge	5	2	{'C': 1}	{'C': 10}	{'C': 10}	{'C': 10}	{'C': 10}	{'C': 10}	{'C': 1}	{'C': 10}
	ElasticNet	1	1	{'C': 10}	{'C': 1}	{'C': 10}	{'C': 10}	{'C': 10}	{'C': 10}	{'C': 10}	{'C': 10}
	ElasticNet	1	2	{'C': 10}	{'C': 10}	{'C': 10}	{'C': 1}	{'C': 10}	{'C': 1}	{'C': 1}	{'C': 10}
	ElasticNet	2	1	{'C': 10}	{'C': 10}	{'C': 10}	{'C': 10}	{'C': 10}	{'C': 1}	{'C': 10}	{'C': 10}
	ElasticNet	2	2	{'C': 10}	{'C': 10}	{'C': 10}	{'C': 10}	{'C': 10}	{'C': 10}	{'C': 10}	{'C': 10}
	ElasticNet	3	1	{'C': 10}	{'C': 10}	{'C': 10}	{'C': 10}	{'C': 10}	{'C': 10}	{'C': 1}	{'C': 10}
	ElasticNet	3	2	{'C': 10}	{'C': 10}	{'C': 10}	{'C': 10}	{'C': 10}	{'C': 10}	{'C': 10}	{'C': 10}
	ElasticNet	4	1	{'C': 10}	{'C': 10}	{'C': 10}	{'C': 10}	{'C': 10}	{'C': 1}	{'C': 10}	{'C': 10}
	ElasticNet	4	2	{'C': 1}	{'C': 1}	{'C': 10}	{'C': 1}	{'C': 1}	{'C': 10}	{'C': 1}	{'C': 10}
	ElasticNet	5	1	{'C': 10}	{'C': 10}	{'C': 10}	{'C': 10}	{'C': 10}	{'C': 10}	{'C': 10}	{'C': 10}
	ElasticNet	5	2	{'C': 10}	{'C': 10}	{'C': 10}	{'C': 10}	{'C': 10}	{'C': 1}	{'C': 1}	{'C': 10}

## Sheet: 6. Yeast6
	Algorithm	Iteration	Fold	Without Sampling	O_Random	O_SMOTE	O_Border	U_Random	U_Condensed	U_NearMiss	SMOTETomek
	AdaBoost	1	1	{'n_estimators': 500, 'learning_rate': 0.01}	{'n_estimators': 50, 'learning_rate': 1.0}	{'n_estimators': 50, 'learning_rate': 1.0}	{'n_estimators': 500, 'learning_rate': 0.01}	{'n_estimators': 50, 'learning_rate': 1.0}	{'n_estimators': 500, 'learning_rate': 0.01}	{'n_estimators': 50, 'learning_rate': 1.0}	{'n_estimators': 50, 'learning_rate': 1.0}
	AdaBoost	1	2	{'n_estimators': 500, 'learning_rate': 0.01}	{'n_estimators': 500, 'learning_rate': 0.01}	{'n_estimators': 500, 'learning_rate': 0.01}	{'n_estimators': 500, 'learning_rate': 0.01}	{'n_estimators': 10, 'learning_rate': 1.0}	{'n_estimators': 500, 'learning_rate': 0.01}	{'n_estimators': 50, 'learning_rate': 1.0}	{'n_estimators': 500, 'learning_rate': 0.01}
	AdaBoost	2	1	{'n_estimators': 500, 'learning_rate': 0.01}	{'n_estimators': 500, 'learning_rate': 0.01}	{'n_estimators': 500, 'learning_rate': 0.01}	{'n_estimators': 500, 'learning_rate': 0.01}	{'n_estimators': 500, 'learning_rate': 0.01}	{'n_estimators': 500, 'learning_rate': 0.01}	{'n_estimators': 50, 'learning_rate': 1.0}	{'n_estimators': 500, 'learning_rate': 0.01}
	AdaBoost	2	2	{'n_estimators': 50, 'learning_rate': 1.0}	{'n_estimators': 50, 'learning_rate': 1.0}	{'n_estimators': 50, 'learning_rate': 1.0}	{'n_estimators': 500, 'learning_rate': 0.01}	{'n_estimators': 500, 'learning_rate': 0.01}	{'n_estimators': 500, 'learning_rate': 0.01}	{'n_estimators': 10, 'learning_rate': 1.0}	{'n_estimators': 500, 'learning_rate': 0.01}
	AdaBoost	3	1	{'n_estimators': 500, 'learning_rate': 0.01}	{'n_estimators': 500, 'learning_rate': 0.01}	{'n_estimators': 500, 'learning_rate': 0.01}	{'n_estimators': 500, 'learning_rate': 0.01}	{'n_estimators': 10, 'learning_rate': 1.0}	{'n_estimators': 50, 'learning_rate': 1.0}	{'n_estimators': 500, 'learning_rate': 0.01}	{'n_estimators': 500, 'learning_rate': 0.01}
	AdaBoost	3	2	{'n_estimators': 500, 'learning_rate': 0.01}	{'n_estimators': 50, 'learning_rate': 1.0}	{'n_estimators': 50, 'learning_rate': 1.0}	{'n_estimators': 500, 'learning_rate': 0.01}	{'n_estimators': 500, 'learning_rate': 0.01}	{'n_estimators': 500, 'learning_rate': 0.01}	{'n_estimators': 10, 'learning_rate': 0.01}	{'n_estimators': 50, 'learning_rate': 1.0}
	AdaBoost	4	1	{'n_estimators': 500, 'learning_rate': 0.01}	{'n_estimators': 50, 'learning_rate': 1.0}	{'n_estimators': 50, 'learning_rate': 1.0}	{'n_estimators': 10, 'learning_rate': 1.0}	{'n_estimators': 500, 'learning_rate': 0.01}	{'n_estimators': 500, 'learning_rate': 0.01}	{'n_estimators': 500, 'learning_rate': 0.01}	{'n_estimators': 50, 'learning_rate': 1.0}
	AdaBoost	4	2	{'n_estimators': 500, 'learning_rate': 0.01}	{'n_estimators': 50, 'learning_rate': 1.0}	{'n_estimators': 50, 'learning_rate': 1.0}	{'n_estimators': 500, 'learning_rate': 0.01}	{'n_estimators': 500, 'learning_rate': 0.01}	{'n_estimators': 500, 'learning_rate': 0.01}	{'n_estimators': 500, 'learning_rate': 0.01}	{'n_estimators': 50, 'learning_rate': 1.0}
	AdaBoost	5	1	{'n_estimators': 500, 'learning_rate': 0.01}	{'n_estimators': 500, 'learning_rate': 0.01}	{'n_estimators': 500, 'learning_rate': 0.01}	{'n_estimators': 500, 'learning_rate': 0.01}	{'n_estimators': 10, 'learning_rate': 0.01}	{'n_estimators': 500, 'learning_rate': 0.01}	{'n_estimators': 500, 'learning_rate': 0.01}	{'n_estimators': 500, 'learning_rate': 0.01}
	AdaBoost	5	2	{'n_estimators': 500, 'learning_rate': 0.01}	{'n_estimators': 500, 'learning_rate': 0.01}	{'n_estimators': 50, 'learning_rate': 1.0}	{'n_estimators': 500, 'learning_rate': 0.01}	{'n_estimators': 10, 'learning_rate': 0.01}	{'n_estimators': 500, 'learning_rate': 0.01}	{'n_estimators': 500, 'learning_rate': 0.01}	{'n_estimators': 50, 'learning_rate': 1.0}
	XGBoost	1	1	{'subsample': 1.0, 'min_child_weight': 1, 'max_depth': 6, 'gamma': 0, 'colsample_bytree': 1.0}	{'subsample': 1.0, 'min_child_weight': 1, 'max_depth': 6, 'gamma': 0, 'colsample_bytree': 1.0}	{'subsample': 1.0, 'min_child_weight': 1, 'max_depth': 6, 'gamma': 0, 'colsample_bytree': 1.0}	{'subsample': 0.6, 'min_child_weight': 5, 'max_depth': 5, 'gamma': 0, 'colsample_bytree': 0.8}	{'subsample': 1.0, 'min_child_weight': 1, 'max_depth': 6, 'gamma': 0, 'colsample_bytree': 1.0}	{'subsample': 1.0, 'min_child_weight': 1, 'max_depth': 6, 'gamma': 0, 'colsample_bytree': 1.0}	{'subsample': 1.0, 'min_child_weight': 1, 'max_depth': 6, 'gamma': 0, 'colsample_bytree': 1.0}	{'subsample': 1.0, 'min_child_weight': 1, 'max_depth': 6, 'gamma': 0, 'colsample_bytree': 1.0}
	XGBoost	1	2	{'subsample': 1.0, 'min_child_weight': 1, 'max_depth': 6, 'gamma': 0, 'colsample_bytree': 1.0}	{'subsample': 1.0, 'min_child_weight': 1, 'max_depth': 6, 'gamma': 0, 'colsample_bytree': 1.0}	{'subsample': 0.8, 'min_child_weight': 10, 'max_depth': 6, 'gamma': 0, 'colsample_bytree': 0.6}	{'subsample': 1.0, 'min_child_weight': 1, 'max_depth': 6, 'gamma': 0, 'colsample_bytree': 1.0}	{'subsample': 1.0, 'min_child_weight': 1, 'max_depth': 6, 'gamma': 0, 'colsample_bytree': 1.0}	{'subsample': 1.0, 'min_child_weight': 1, 'max_depth': 6, 'gamma': 0, 'colsample_bytree': 1.0}	{'subsample': 1.0, 'min_child_weight': 1, 'max_depth': 6, 'gamma': 0, 'colsample_bytree': 1.0}	{'subsample': 0.8, 'min_child_weight': 10, 'max_depth': 6, 'gamma': 0, 'colsample_bytree': 0.6}
	XGBoost	2	1	{'subsample': 1.0, 'min_child_weight': 1, 'max_depth': 6, 'gamma': 0, 'colsample_bytree': 1.0}	{'subsample': 1.0, 'min_child_weight': 1, 'max_depth': 6, 'gamma': 0, 'colsample_bytree': 1.0}	{'subsample': 1.0, 'min_child_weight': 1, 'max_depth': 6, 'gamma': 0, 'colsample_bytree': 1.0}	{'subsample': 1.0, 'min_child_weight': 1, 'max_depth': 6, 'gamma': 0, 'colsample_bytree': 1.0}	{'subsample': 1.0, 'min_child_weight': 1, 'max_depth': 6, 'gamma': 0, 'colsample_bytree': 1.0}	{'subsample': 1.0, 'min_child_weight': 1, 'max_depth': 6, 'gamma': 0, 'colsample_bytree': 1.0}	{'subsample': 1.0, 'min_child_weight': 1, 'max_depth': 6, 'gamma': 0, 'colsample_bytree': 1.0}	{'subsample': 1.0, 'min_child_weight': 1, 'max_depth': 6, 'gamma': 0, 'colsample_bytree': 1.0}
	XGBoost	2	2	{'subsample': 1.0, 'min_child_weight': 1, 'max_depth': 6, 'gamma': 0, 'colsample_bytree': 1.0}	{'subsample': 1.0, 'min_child_weight': 1, 'max_depth': 6, 'gamma': 0, 'colsample_bytree': 1.0}	{'subsample': 0.6, 'min_child_weight': 5, 'max_depth': 5, 'gamma': 0, 'colsample_bytree': 0.8}	{'subsample': 1.0, 'min_child_weight': 1, 'max_depth': 6, 'gamma': 0, 'colsample_bytree': 1.0}	{'subsample': 1.0, 'min_child_weight': 1, 'max_depth': 6, 'gamma': 0, 'colsample_bytree': 1.0}	{'subsample': 1.0, 'min_child_weight': 1, 'max_depth': 6, 'gamma': 0, 'colsample_bytree': 1.0}	{'subsample': 1.0, 'min_child_weight': 1, 'max_depth': 6, 'gamma': 0, 'colsample_bytree': 1.0}	{'subsample': 1.0, 'min_child_weight': 1, 'max_depth': 6, 'gamma': 0, 'colsample_bytree': 1.0}
	XGBoost	3	1	{'subsample': 0.6, 'min_child_weight': 5, 'max_depth': 5, 'gamma': 0, 'colsample_bytree': 0.8}	{'subsample': 1.0, 'min_child_weight': 1, 'max_depth': 6, 'gamma': 0, 'colsample_bytree': 1.0}	{'subsample': 1.0, 'min_child_weight': 1, 'max_depth': 6, 'gamma': 0, 'colsample_bytree': 1.0}	{'subsample': 1.0, 'min_child_weight': 1, 'max_depth': 6, 'gamma': 0, 'colsample_bytree': 1.0}	{'subsample': 1.0, 'min_child_weight': 1, 'max_depth': 6, 'gamma': 0, 'colsample_bytree': 1.0}	{'subsample': 1.0, 'min_child_weight': 1, 'max_depth': 6, 'gamma': 0, 'colsample_bytree': 1.0}	{'subsample': 1.0, 'min_child_weight': 1, 'max_depth': 6, 'gamma': 0, 'colsample_bytree': 1.0}	{'subsample': 1.0, 'min_child_weight': 1, 'max_depth': 6, 'gamma': 0, 'colsample_bytree': 1.0}
	XGBoost	3	2	{'subsample': 1.0, 'min_child_weight': 1, 'max_depth': 6, 'gamma': 0, 'colsample_bytree': 1.0}	{'subsample': 1.0, 'min_child_weight': 1, 'max_depth': 6, 'gamma': 0, 'colsample_bytree': 1.0}	{'subsample': 1.0, 'min_child_weight': 1, 'max_depth': 6, 'gamma': 0, 'colsample_bytree': 1.0}	{'subsample': 1.0, 'min_child_weight': 1, 'max_depth': 6, 'gamma': 0, 'colsample_bytree': 1.0}	{'subsample': 1.0, 'min_child_weight': 1, 'max_depth': 6, 'gamma': 0, 'colsample_bytree': 1.0}	{'subsample': 1.0, 'min_child_weight': 1, 'max_depth': 6, 'gamma': 0, 'colsample_bytree': 1.0}	{'subsample': 1.0, 'min_child_weight': 1, 'max_depth': 6, 'gamma': 0, 'colsample_bytree': 1.0}	{'subsample': 1.0, 'min_child_weight': 1, 'max_depth': 6, 'gamma': 0, 'colsample_bytree': 1.0}
	XGBoost	4	1	{'subsample': 1.0, 'min_child_weight': 1, 'max_depth': 6, 'gamma': 0, 'colsample_bytree': 1.0}	{'subsample': 1.0, 'min_child_weight': 1, 'max_depth': 6, 'gamma': 0, 'colsample_bytree': 1.0}	{'subsample': 1.0, 'min_child_weight': 1, 'max_depth': 6, 'gamma': 0, 'colsample_bytree': 1.0}	{'subsample': 1.0, 'min_child_weight': 1, 'max_depth': 6, 'gamma': 0, 'colsample_bytree': 1.0}	{'subsample': 1.0, 'min_child_weight': 1, 'max_depth': 6, 'gamma': 0, 'colsample_bytree': 1.0}	{'subsample': 1.0, 'min_child_weight': 1, 'max_depth': 6, 'gamma': 0, 'colsample_bytree': 1.0}	{'subsample': 1.0, 'min_child_weight': 1, 'max_depth': 6, 'gamma': 0, 'colsample_bytree': 1.0}	{'subsample': 1.0, 'min_child_weight': 1, 'max_depth': 6, 'gamma': 0, 'colsample_bytree': 1.0}
	XGBoost	4	2	{'subsample': 0.6, 'min_child_weight': 5, 'max_depth': 5, 'gamma': 0, 'colsample_bytree': 0.8}	{'subsample': 1.0, 'min_child_weight': 1, 'max_depth': 6, 'gamma': 0, 'colsample_bytree': 1.0}	{'subsample': 1.0, 'min_child_weight': 1, 'max_depth': 6, 'gamma': 0, 'colsample_bytree': 1.0}	{'subsample': 1.0, 'min_child_weight': 1, 'max_depth': 6, 'gamma': 0, 'colsample_bytree': 1.0}	{'subsample': 1.0, 'min_child_weight': 1, 'max_depth': 6, 'gamma': 0, 'colsample_bytree': 1.0}	{'subsample': 1.0, 'min_child_weight': 1, 'max_depth': 6, 'gamma': 0, 'colsample_bytree': 1.0}	{'subsample': 1.0, 'min_child_weight': 1, 'max_depth': 6, 'gamma': 0, 'colsample_bytree': 1.0}	{'subsample': 1.0, 'min_child_weight': 1, 'max_depth': 6, 'gamma': 0, 'colsample_bytree': 1.0}
	XGBoost	5	1	{'subsample': 1.0, 'min_child_weight': 1, 'max_depth': 6, 'gamma': 0, 'colsample_bytree': 1.0}	{'subsample': 0.6, 'min_child_weight': 5, 'max_depth': 5, 'gamma': 0, 'colsample_bytree': 0.8}	{'subsample': 0.6, 'min_child_weight': 5, 'max_depth': 5, 'gamma': 0, 'colsample_bytree': 0.8}	{'subsample': 1.0, 'min_child_weight': 1, 'max_depth': 6, 'gamma': 0, 'colsample_bytree': 1.0}	{'subsample': 1.0, 'min_child_weight': 1, 'max_depth': 6, 'gamma': 0, 'colsample_bytree': 1.0}	{'subsample': 1.0, 'min_child_weight': 1, 'max_depth': 6, 'gamma': 0, 'colsample_bytree': 1.0}	{'subsample': 1.0, 'min_child_weight': 1, 'max_depth': 6, 'gamma': 0, 'colsample_bytree': 1.0}	{'subsample': 0.6, 'min_child_weight': 5, 'max_depth': 5, 'gamma': 0, 'colsample_bytree': 0.8}
	XGBoost	5	2	{'subsample': 1.0, 'min_child_weight': 1, 'max_depth': 6, 'gamma': 0, 'colsample_bytree': 1.0}	{'subsample': 1.0, 'min_child_weight': 1, 'max_depth': 6, 'gamma': 0, 'colsample_bytree': 1.0}	{'subsample': 1.0, 'min_child_weight': 1, 'max_depth': 6, 'gamma': 0, 'colsample_bytree': 1.0}	{'subsample': 1.0, 'min_child_weight': 1, 'max_depth': 6, 'gamma': 0, 'colsample_bytree': 1.0}	{'subsample': 1.0, 'min_child_weight': 1, 'max_depth': 6, 'gamma': 0, 'colsample_bytree': 1.0}	{'subsample': 1.0, 'min_child_weight': 1, 'max_depth': 6, 'gamma': 0, 'colsample_bytree': 1.0}	{'subsample': 1.0, 'min_child_weight': 1, 'max_depth': 6, 'gamma': 0, 'colsample_bytree': 1.0}	{'subsample': 1.0, 'min_child_weight': 1, 'max_depth': 6, 'gamma': 0, 'colsample_bytree': 1.0}
	RF	1	1	{'n_estimators': 3000}	{'n_estimators': 100}	{'n_estimators': 500}	{'n_estimators': 3000}	{'n_estimators': 3000}	{'n_estimators': 100}	{'n_estimators': 1000}	{'n_estimators': 500}
	RF	1	2	{'n_estimators': 100}	{'n_estimators': 100}	{'n_estimators': 500}	{'n_estimators': 1000}	{'n_estimators': 100}	{'n_estimators': 100}	{'n_estimators': 500}	{'n_estimators': 500}
	RF	2	1	{'n_estimators': 3000}	{'n_estimators': 100}	{'n_estimators': 3000}	{'n_estimators': 3000}	{'n_estimators': 500}	{'n_estimators': 100}	{'n_estimators': 3000}	{'n_estimators': 3000}
	RF	2	2	{'n_estimators': 3000}	{'n_estimators': 100}	{'n_estimators': 3000}	{'n_estimators': 3000}	{'n_estimators': 500}	{'n_estimators': 100}	{'n_estimators': 1000}	{'n_estimators': 500}
	RF	3	1	{'n_estimators': 500}	{'n_estimators': 100}	{'n_estimators': 3000}	{'n_estimators': 3000}	{'n_estimators': 100}	{'n_estimators': 500}	{'n_estimators': 1000}	{'n_estimators': 3000}
	RF	3	2	{'n_estimators': 500}	{'n_estimators': 100}	{'n_estimators': 3000}	{'n_estimators': 1000}	{'n_estimators': 500}	{'n_estimators': 3000}	{'n_estimators': 500}	{'n_estimators': 1000}
	RF	4	1	{'n_estimators': 1000}	{'n_estimators': 100}	{'n_estimators': 3000}	{'n_estimators': 1000}	{'n_estimators': 100}	{'n_estimators': 100}	{'n_estimators': 100}	{'n_estimators': 3000}
	RF	4	2	{'n_estimators': 1000}	{'n_estimators': 100}	{'n_estimators': 1000}	{'n_estimators': 3000}	{'n_estimators': 100}	{'n_estimators': 3000}	{'n_estimators': 3000}	{'n_estimators': 1000}
	RF	5	1	{'n_estimators': 1000}	{'n_estimators': 100}	{'n_estimators': 3000}	{'n_estimators': 3000}	{'n_estimators': 100}	{'n_estimators': 100}	{'n_estimators': 500}	{'n_estimators': 3000}
	RF	5	2	{'n_estimators': 3000}	{'n_estimators': 100}	{'n_estimators': 3000}	{'n_estimators': 3000}	{'n_estimators': 100}	{'n_estimators': 500}	{'n_estimators': 500}	{'n_estimators': 3000}
	SVM	1	1	{'gamma': 0.01, 'C': 1}	{'gamma': 1.0, 'C': 10}	{'gamma': 1.0, 'C': 10}	{'gamma': 1.0, 'C': 10}	{'gamma': 0.01, 'C': 1}	{'gamma': 0.01, 'C': 1}	{'gamma': 1.0, 'C': 10}	{'gamma': 1.0, 'C': 10}
	SVM	1	2	{'gamma': 1.0, 'C': 10}	{'gamma': 1.0, 'C': 10}	{'gamma': 1.0, 'C': 10}	{'gamma': 1.0, 'C': 10}	{'gamma': 1.0, 'C': 10}	{'gamma': 1.0, 'C': 10}	{'gamma': 1.0, 'C': 10}	{'gamma': 1.0, 'C': 10}
	SVM	2	1	{'gamma': 0.01, 'C': 1}	{'gamma': 1.0, 'C': 10}	{'gamma': 1.0, 'C': 10}	{'gamma': 1.0, 'C': 10}	{'gamma': 0.01, 'C': 1}	{'gamma': 0.01, 'C': 0.1}	{'gamma': 1.0, 'C': 10}	{'gamma': 1.0, 'C': 10}
	SVM	2	2	{'gamma': 1.0, 'C': 10}	{'gamma': 1.0, 'C': 10}	{'gamma': 1.0, 'C': 10}	{'gamma': 1.0, 'C': 10}	{'gamma': 1.0, 'C': 10}	{'gamma': 0.01, 'C': 1}	{'gamma': 1.0, 'C': 10}	{'gamma': 1.0, 'C': 10}
	SVM	3	1	{'gamma': 0.01, 'C': 1}	{'gamma': 1.0, 'C': 10}	{'gamma': 1.0, 'C': 10}	{'gamma': 1.0, 'C': 10}	{'gamma': 1.0, 'C': 10}	{'gamma': 0.01, 'C': 1}	{'gamma': 0.01, 'C': 1}	{'gamma': 1.0, 'C': 10}
	SVM	3	2	{'gamma': 0.01, 'C': 0.1}	{'gamma': 1.0, 'C': 10}	{'gamma': 1.0, 'C': 10}	{'gamma': 1.0, 'C': 10}	{'gamma': 0.01, 'C': 1}	{'gamma': 0.01, 'C': 1}	{'gamma': 1.0, 'C': 10}	{'gamma': 1.0, 'C': 10}
	SVM	4	1	{'gamma': 0.01, 'C': 1}	{'gamma': 1.0, 'C': 10}	{'gamma': 1.0, 'C': 10}	{'gamma': 1.0, 'C': 10}	{'gamma': 0.01, 'C': 1}	{'gamma': 0.01, 'C': 0.1}	{'gamma': 0.01, 'C': 1}	{'gamma': 1.0, 'C': 10}
	SVM	4	2	{'gamma': 0.01, 'C': 1}	{'gamma': 1.0, 'C': 10}	{'gamma': 1.0, 'C': 10}	{'gamma': 1.0, 'C': 10}	{'gamma': 0.01, 'C': 0.1}	{'gamma': 0.01, 'C': 1}	{'gamma': 0.01, 'C': 1}	{'gamma': 1.0, 'C': 10}
	SVM	5	1	{'gamma': 0.01, 'C': 1}	{'gamma': 1.0, 'C': 10}	{'gamma': 1.0, 'C': 10}	{'gamma': 1.0, 'C': 10}	{'gamma': 1.0, 'C': 10}	{'gamma': 0.01, 'C': 1}	{'gamma': 1.0, 'C': 10}	{'gamma': 1.0, 'C': 10}
	SVM	5	2	{'gamma': 0.01, 'C': 1}	{'gamma': 1.0, 'C': 10}	{'gamma': 1.0, 'C': 10}	{'gamma': 1.0, 'C': 10}	{'gamma': 0.01, 'C': 1}	{'gamma': 0.01, 'C': 1}	{'gamma': 0.01, 'C': 1}	{'gamma': 1.0, 'C': 10}
	LDA	1	1
	LDA	1	2
	LDA	2	1
	LDA	2	2
	LDA	3	1
	LDA	3	2
	LDA	4	1
	LDA	4	2
	LDA	5	1
	LDA	5	2
	Lasso	1	1	{'C': 10}	{'C': 0.1}	{'C': 0.1}	{'C': 1}	{'C': 1}	{'C': 10}	{'C': 1}	{'C': 0.1}
	Lasso	1	2	{'C': 10}	{'C': 10}	{'C': 10}	{'C': 10}	{'C': 10}	{'C': 10}	{'C': 10}	{'C': 10}
	Lasso	2	1	{'C': 1}	{'C': 0.1}	{'C': 0.1}	{'C': 0.1}	{'C': 1}	{'C': 1}	{'C': 10}	{'C': 0.1}
	Lasso	2	2	{'C': 10}	{'C': 0.1}	{'C': 10}	{'C': 10}	{'C': 10}	{'C': 1}	{'C': 10}	{'C': 10}
	Lasso	3	1	{'C': 10}	{'C': 10}	{'C': 10}	{'C': 1}	{'C': 10}	{'C': 10}	{'C': 10}	{'C': 10}
	Lasso	3	2	{'C': 1}	{'C': 0.1}	{'C': 10}	{'C': 10}	{'C': 1}	{'C': 10}	{'C': 10}	{'C': 10}
	Lasso	4	1	{'C': 10}	{'C': 10}	{'C': 10}	{'C': 10}	{'C': 1}	{'C': 10}	{'C': 1}	{'C': 10}
	Lasso	4	2	{'C': 1}	{'C': 0.1}	{'C': 0.1}	{'C': 10}	{'C': 1}	{'C': 1}	{'C': 10}	{'C': 0.1}
	Lasso	5	1	{'C': 10}	{'C': 1}	{'C': 10}	{'C': 10}	{'C': 10}	{'C': 1}	{'C': 1}	{'C': 10}
	Lasso	5	2	{'C': 10}	{'C': 10}	{'C': 0.1}	{'C': 10}	{'C': 10}	{'C': 1}	{'C': 1}	{'C': 0.1}
	Ridge	1	1	{'C': 1}	{'C': 0.1}	{'C': 0.1}	{'C': 1}	{'C': 0.1}	{'C': 1}	{'C': 0.1}	{'C': 0.1}
	Ridge	1	2	{'C': 10}	{'C': 10}	{'C': 10}	{'C': 10}	{'C': 10}	{'C': 10}	{'C': 10}	{'C': 10}
	Ridge	2	1	{'C': 1}	{'C': 0.1}	{'C': 0.1}	{'C': 0.1}	{'C': 0.1}	{'C': 0.1}	{'C': 0.1}	{'C': 0.1}
	Ridge	2	2	{'C': 1}	{'C': 10}	{'C': 10}	{'C': 10}	{'C': 10}	{'C': 1}	{'C': 1}	{'C': 10}
	Ridge	3	1	{'C': 0.1}	{'C': 10}	{'C': 10}	{'C': 1}	{'C': 0.1}	{'C': 10}	{'C': 0.1}	{'C': 10}
	Ridge	3	2	{'C': 0.1}	{'C': 0.1}	{'C': 10}	{'C': 10}	{'C': 1}	{'C': 1}	{'C': 0.1}	{'C': 10}
	Ridge	4	1	{'C': 10}	{'C': 0.1}	{'C': 10}	{'C': 10}	{'C': 0.1}	{'C': 1}	{'C': 1}	{'C': 10}
	Ridge	4	2	{'C': 0.1}	{'C': 0.1}	{'C': 0.1}	{'C': 0.1}	{'C': 0.1}	{'C': 0.1}	{'C': 1}	{'C': 0.1}
	Ridge	5	1	{'C': 0.1}	{'C': 10}	{'C': 10}	{'C': 10}	{'C': 0.1}	{'C': 0.1}	{'C': 10}	{'C': 10}
	Ridge	5	2	{'C': 1}	{'C': 0.1}	{'C': 0.1}	{'C': 10}	{'C': 10}	{'C': 0.1}	{'C': 0.1}	{'C': 0.1}
	ElasticNet	1	1	{'C': 1}	{'C': 0.1}	{'C': 0.1}	{'C': 1}	{'C': 1}	{'C': 1}	{'C': 1}	{'C': 0.1}
	ElasticNet	1	2	{'C': 10}	{'C': 10}	{'C': 10}	{'C': 10}	{'C': 10}	{'C': 10}	{'C': 10}	{'C': 10}
	ElasticNet	2	1	{'C': 1}	{'C': 0.1}	{'C': 0.1}	{'C': 0.1}	{'C': 0.1}	{'C': 1}	{'C': 1}	{'C': 0.1}
	ElasticNet	2	2	{'C': 1}	{'C': 0.1}	{'C': 10}	{'C': 10}	{'C': 0.1}	{'C': 1}	{'C': 10}	{'C': 10}
	ElasticNet	3	1	{'C': 1}	{'C': 10}	{'C': 10}	{'C': 1}	{'C': 10}	{'C': 10}	{'C': 1}	{'C': 10}
	ElasticNet	3	2	{'C': 0.1}	{'C': 0.1}	{'C': 10}	{'C': 10}	{'C': 1}	{'C': 1}	{'C': 10}	{'C': 10}
	ElasticNet	4	1	{'C': 10}	{'C': 0.1}	{'C': 10}	{'C': 1}	{'C': 0.1}	{'C': 10}	{'C': 1}	{'C': 10}
	ElasticNet	4	2	{'C': 1}	{'C': 0.1}	{'C': 0.1}	{'C': 0.1}	{'C': 0.1}	{'C': 1}	{'C': 1}	{'C': 0.1}
	ElasticNet	5	1	{'C': 1}	{'C': 10}	{'C': 10}	{'C': 10}	{'C': 10}	{'C': 1}	{'C': 1}	{'C': 10}
	ElasticNet	5	2	{'C': 10}	{'C': 0.1}	{'C': 0.1}	{'C': 10}	{'C': 10}	{'C': 1}	{'C': 1}	{'C': 0.1}

## Sheet: 7. Yeast5
	Algorithm	Iteration	Fold	Without Sampling	O_Random	O_SMOTE	O_Border	U_Random	U_Condensed	U_NearMiss	SMOTETomek
	AdaBoost	1	1	{'n_estimators': 500, 'learning_rate': 0.01}	{'n_estimators': 50, 'learning_rate': 1.0}	{'n_estimators': 50, 'learning_rate': 1.0}	{'n_estimators': 50, 'learning_rate': 1.0}	{'n_estimators': 10, 'learning_rate': 1.0}	{'n_estimators': 500, 'learning_rate': 0.01}	{'n_estimators': 500, 'learning_rate': 0.01}	{'n_estimators': 50, 'learning_rate': 1.0}
	AdaBoost	1	2	{'n_estimators': 500, 'learning_rate': 0.01}	{'n_estimators': 10, 'learning_rate': 1.0}	{'n_estimators': 500, 'learning_rate': 0.01}	{'n_estimators': 500, 'learning_rate': 0.01}	{'n_estimators': 10, 'learning_rate': 1.0}	{'n_estimators': 500, 'learning_rate': 0.01}	{'n_estimators': 500, 'learning_rate': 0.01}	{'n_estimators': 500, 'learning_rate': 0.01}
	AdaBoost	2	1	{'n_estimators': 500, 'learning_rate': 0.01}	{'n_estimators': 10, 'learning_rate': 1.0}	{'n_estimators': 500, 'learning_rate': 0.01}	{'n_estimators': 500, 'learning_rate': 0.01}	{'n_estimators': 10, 'learning_rate': 1.0}	{'n_estimators': 500, 'learning_rate': 0.01}	{'n_estimators': 50, 'learning_rate': 1.0}	{'n_estimators': 500, 'learning_rate': 0.01}
	AdaBoost	2	2	{'n_estimators': 50, 'learning_rate': 1.0}	{'n_estimators': 10, 'learning_rate': 1.0}	{'n_estimators': 10, 'learning_rate': 1.0}	{'n_estimators': 50, 'learning_rate': 1.0}	{'n_estimators': 10, 'learning_rate': 1.0}	{'n_estimators': 500, 'learning_rate': 0.01}	{'n_estimators': 50, 'learning_rate': 1.0}	{'n_estimators': 10, 'learning_rate': 1.0}
	AdaBoost	3	1	{'n_estimators': 50, 'learning_rate': 1.0}	{'n_estimators': 500, 'learning_rate': 0.01}	{'n_estimators': 500, 'learning_rate': 0.01}	{'n_estimators': 500, 'learning_rate': 0.01}	{'n_estimators': 10, 'learning_rate': 0.01}	{'n_estimators': 500, 'learning_rate': 0.01}	{'n_estimators': 500, 'learning_rate': 0.01}	{'n_estimators': 500, 'learning_rate': 0.01}
	AdaBoost	3	2	{'n_estimators': 500, 'learning_rate': 0.01}	{'n_estimators': 500, 'learning_rate': 0.01}	{'n_estimators': 500, 'learning_rate': 0.01}	{'n_estimators': 500, 'learning_rate': 0.01}	{'n_estimators': 10, 'learning_rate': 0.01}	{'n_estimators': 500, 'learning_rate': 0.01}	{'n_estimators': 50, 'learning_rate': 1.0}	{'n_estimators': 500, 'learning_rate': 0.01}
	AdaBoost	4	1	{'n_estimators': 500, 'learning_rate': 0.01}	{'n_estimators': 50, 'learning_rate': 1.0}	{'n_estimators': 500, 'learning_rate': 0.01}	{'n_estimators': 500, 'learning_rate': 0.01}	{'n_estimators': 10, 'learning_rate': 1.0}	{'n_estimators': 500, 'learning_rate': 0.01}	{'n_estimators': 500, 'learning_rate': 0.01}	{'n_estimators': 500, 'learning_rate': 0.01}
	AdaBoost	4	2	{'n_estimators': 500, 'learning_rate': 0.01}	{'n_estimators': 500, 'learning_rate': 0.01}	{'n_estimators': 50, 'learning_rate': 1.0}	{'n_estimators': 10, 'learning_rate': 1.0}	{'n_estimators': 500, 'learning_rate': 0.01}	{'n_estimators': 500, 'learning_rate': 0.01}	{'n_estimators': 500, 'learning_rate': 0.01}	{'n_estimators': 50, 'learning_rate': 1.0}
	AdaBoost	5	1	{'n_estimators': 50, 'learning_rate': 1.0}	{'n_estimators': 50, 'learning_rate': 1.0}	{'n_estimators': 50, 'learning_rate': 1.0}	{'n_estimators': 50, 'learning_rate': 1.0}	{'n_estimators': 10, 'learning_rate': 1.0}	{'n_estimators': 500, 'learning_rate': 0.01}	{'n_estimators': 500, 'learning_rate': 0.01}	{'n_estimators': 50, 'learning_rate': 1.0}
	AdaBoost	5	2	{'n_estimators': 500, 'learning_rate': 0.01}	{'n_estimators': 500, 'learning_rate': 0.01}	{'n_estimators': 500, 'learning_rate': 0.01}	{'n_estimators': 500, 'learning_rate': 0.01}	{'n_estimators': 10, 'learning_rate': 1.0}	{'n_estimators': 500, 'learning_rate': 0.01}	{'n_estimators': 500, 'learning_rate': 0.01}	{'n_estimators': 500, 'learning_rate': 0.01}
	XGBoost	1	1	{'subsample': 0.8, 'min_child_weight': 10, 'max_depth': 6, 'gamma': 0, 'colsample_bytree': 0.6}	{'subsample': 1.0, 'min_child_weight': 1, 'max_depth': 6, 'gamma': 0, 'colsample_bytree': 1.0}	{'subsample': 1.0, 'min_child_weight': 1, 'max_depth': 6, 'gamma': 0, 'colsample_bytree': 1.0}	{'subsample': 1.0, 'min_child_weight': 1, 'max_depth': 6, 'gamma': 0, 'colsample_bytree': 1.0}	{'subsample': 1.0, 'min_child_weight': 1, 'max_depth': 6, 'gamma': 0, 'colsample_bytree': 1.0}	{'subsample': 1.0, 'min_child_weight': 1, 'max_depth': 6, 'gamma': 0, 'colsample_bytree': 1.0}	{'subsample': 1.0, 'min_child_weight': 1, 'max_depth': 6, 'gamma': 0, 'colsample_bytree': 1.0}	{'subsample': 1.0, 'min_child_weight': 1, 'max_depth': 6, 'gamma': 0, 'colsample_bytree': 1.0}
	XGBoost	1	2	{'subsample': 0.6, 'min_child_weight': 5, 'max_depth': 5, 'gamma': 0, 'colsample_bytree': 0.8}	{'subsample': 1.0, 'min_child_weight': 1, 'max_depth': 6, 'gamma': 0, 'colsample_bytree': 1.0}	{'subsample': 1.0, 'min_child_weight': 1, 'max_depth': 6, 'gamma': 0, 'colsample_bytree': 1.0}	{'subsample': 1.0, 'min_child_weight': 1, 'max_depth': 6, 'gamma': 0, 'colsample_bytree': 1.0}	{'subsample': 1.0, 'min_child_weight': 1, 'max_depth': 6, 'gamma': 0, 'colsample_bytree': 1.0}	{'subsample': 1.0, 'min_child_weight': 1, 'max_depth': 6, 'gamma': 0, 'colsample_bytree': 1.0}	{'subsample': 1.0, 'min_child_weight': 1, 'max_depth': 6, 'gamma': 0, 'colsample_bytree': 1.0}	{'subsample': 1.0, 'min_child_weight': 1, 'max_depth': 6, 'gamma': 0, 'colsample_bytree': 1.0}
	XGBoost	2	1	{'subsample': 0.8, 'min_child_weight': 10, 'max_depth': 6, 'gamma': 0, 'colsample_bytree': 0.6}	{'subsample': 1.0, 'min_child_weight': 1, 'max_depth': 6, 'gamma': 0, 'colsample_bytree': 1.0}	{'subsample': 1.0, 'min_child_weight': 1, 'max_depth': 6, 'gamma': 0, 'colsample_bytree': 1.0}	{'subsample': 1.0, 'min_child_weight': 1, 'max_depth': 6, 'gamma': 0, 'colsample_bytree': 1.0}	{'subsample': 1.0, 'min_child_weight': 1, 'max_depth': 6, 'gamma': 0, 'colsample_bytree': 1.0}	{'subsample': 1.0, 'min_child_weight': 1, 'max_depth': 6, 'gamma': 0, 'colsample_bytree': 1.0}	{'subsample': 1.0, 'min_child_weight': 1, 'max_depth': 6, 'gamma': 0, 'colsample_bytree': 1.0}	{'subsample': 1.0, 'min_child_weight': 1, 'max_depth': 6, 'gamma': 0, 'colsample_bytree': 1.0}
	XGBoost	2	2	{'subsample': 1.0, 'min_child_weight': 1, 'max_depth': 6, 'gamma': 0, 'colsample_bytree': 1.0}	{'subsample': 0.6, 'min_child_weight': 5, 'max_depth': 5, 'gamma': 0, 'colsample_bytree': 0.8}	{'subsample': 1.0, 'min_child_weight': 1, 'max_depth': 6, 'gamma': 0, 'colsample_bytree': 1.0}	{'subsample': 1.0, 'min_child_weight': 1, 'max_depth': 6, 'gamma': 0, 'colsample_bytree': 1.0}	{'subsample': 1.0, 'min_child_weight': 1, 'max_depth': 6, 'gamma': 0, 'colsample_bytree': 1.0}	{'subsample': 1.0, 'min_child_weight': 1, 'max_depth': 6, 'gamma': 0, 'colsample_bytree': 1.0}	{'subsample': 1.0, 'min_child_weight': 1, 'max_depth': 6, 'gamma': 0, 'colsample_bytree': 1.0}	{'subsample': 1.0, 'min_child_weight': 1, 'max_depth': 6, 'gamma': 0, 'colsample_bytree': 1.0}
	XGBoost	3	1	{'subsample': 0.8, 'min_child_weight': 10, 'max_depth': 6, 'gamma': 0, 'colsample_bytree': 0.6}	{'subsample': 1.0, 'min_child_weight': 1, 'max_depth': 6, 'gamma': 0, 'colsample_bytree': 1.0}	{'subsample': 1.0, 'min_child_weight': 1, 'max_depth': 6, 'gamma': 0, 'colsample_bytree': 1.0}	{'subsample': 1.0, 'min_child_weight': 1, 'max_depth': 6, 'gamma': 0, 'colsample_bytree': 1.0}	{'subsample': 1.0, 'min_child_weight': 1, 'max_depth': 6, 'gamma': 0, 'colsample_bytree': 1.0}	{'subsample': 1.0, 'min_child_weight': 1, 'max_depth': 6, 'gamma': 0, 'colsample_bytree': 1.0}	{'subsample': 1.0, 'min_child_weight': 1, 'max_depth': 6, 'gamma': 0, 'colsample_bytree': 1.0}	{'subsample': 1.0, 'min_child_weight': 1, 'max_depth': 6, 'gamma': 0, 'colsample_bytree': 1.0}
	XGBoost	3	2	{'subsample': 1.0, 'min_child_weight': 1, 'max_depth': 6, 'gamma': 0, 'colsample_bytree': 1.0}	{'subsample': 0.8, 'min_child_weight': 10, 'max_depth': 6, 'gamma': 0, 'colsample_bytree': 0.6}	{'subsample': 0.8, 'min_child_weight': 10, 'max_depth': 6, 'gamma': 0, 'colsample_bytree': 0.6}	{'subsample': 1.0, 'min_child_weight': 1, 'max_depth': 6, 'gamma': 0, 'colsample_bytree': 1.0}	{'subsample': 1.0, 'min_child_weight': 1, 'max_depth': 6, 'gamma': 0, 'colsample_bytree': 1.0}	{'subsample': 1.0, 'min_child_weight': 1, 'max_depth': 6, 'gamma': 0, 'colsample_bytree': 1.0}	{'subsample': 1.0, 'min_child_weight': 1, 'max_depth': 6, 'gamma': 0, 'colsample_bytree': 1.0}	{'subsample': 0.8, 'min_child_weight': 10, 'max_depth': 6, 'gamma': 0, 'colsample_bytree': 0.6}
	XGBoost	4	1	{'subsample': 0.8, 'min_child_weight': 10, 'max_depth': 6, 'gamma': 0, 'colsample_bytree': 0.6}	{'subsample': 0.8, 'min_child_weight': 10, 'max_depth': 6, 'gamma': 0, 'colsample_bytree': 0.6}	{'subsample': 1.0, 'min_child_weight': 1, 'max_depth': 6, 'gamma': 0, 'colsample_bytree': 1.0}	{'subsample': 0.8, 'min_child_weight': 10, 'max_depth': 6, 'gamma': 0, 'colsample_bytree': 0.6}	{'subsample': 1.0, 'min_child_weight': 1, 'max_depth': 6, 'gamma': 0, 'colsample_bytree': 1.0}	{'subsample': 1.0, 'min_child_weight': 1, 'max_depth': 6, 'gamma': 0, 'colsample_bytree': 1.0}	{'subsample': 1.0, 'min_child_weight': 1, 'max_depth': 6, 'gamma': 0, 'colsample_bytree': 1.0}	{'subsample': 1.0, 'min_child_weight': 1, 'max_depth': 6, 'gamma': 0, 'colsample_bytree': 1.0}
	XGBoost	4	2	{'subsample': 1.0, 'min_child_weight': 1, 'max_depth': 6, 'gamma': 0, 'colsample_bytree': 1.0}	{'subsample': 1.0, 'min_child_weight': 1, 'max_depth': 6, 'gamma': 0, 'colsample_bytree': 1.0}	{'subsample': 1.0, 'min_child_weight': 1, 'max_depth': 6, 'gamma': 0, 'colsample_bytree': 1.0}	{'subsample': 1.0, 'min_child_weight': 1, 'max_depth': 6, 'gamma': 0, 'colsample_bytree': 1.0}	{'subsample': 1.0, 'min_child_weight': 1, 'max_depth': 6, 'gamma': 0, 'colsample_bytree': 1.0}	{'subsample': 1.0, 'min_child_weight': 1, 'max_depth': 6, 'gamma': 0, 'colsample_bytree': 1.0}	{'subsample': 1.0, 'min_child_weight': 1, 'max_depth': 6, 'gamma': 0, 'colsample_bytree': 1.0}	{'subsample': 1.0, 'min_child_weight': 1, 'max_depth': 6, 'gamma': 0, 'colsample_bytree': 1.0}
	XGBoost	5	1	{'subsample': 1.0, 'min_child_weight': 1, 'max_depth': 6, 'gamma': 0, 'colsample_bytree': 1.0}	{'subsample': 1.0, 'min_child_weight': 1, 'max_depth': 6, 'gamma': 0, 'colsample_bytree': 1.0}	{'subsample': 1.0, 'min_child_weight': 1, 'max_depth': 6, 'gamma': 0, 'colsample_bytree': 1.0}	{'subsample': 1.0, 'min_child_weight': 1, 'max_depth': 6, 'gamma': 0, 'colsample_bytree': 1.0}	{'subsample': 1.0, 'min_child_weight': 1, 'max_depth': 6, 'gamma': 0, 'colsample_bytree': 1.0}	{'subsample': 1.0, 'min_child_weight': 1, 'max_depth': 6, 'gamma': 0, 'colsample_bytree': 1.0}	{'subsample': 1.0, 'min_child_weight': 1, 'max_depth': 6, 'gamma': 0, 'colsample_bytree': 1.0}	{'subsample': 1.0, 'min_child_weight': 1, 'max_depth': 6, 'gamma': 0, 'colsample_bytree': 1.0}
	XGBoost	5	2	{'subsample': 0.6, 'min_child_weight': 5, 'max_depth': 5, 'gamma': 0, 'colsample_bytree': 0.8}	{'subsample': 1.0, 'min_child_weight': 1, 'max_depth': 6, 'gamma': 0, 'colsample_bytree': 1.0}	{'subsample': 1.0, 'min_child_weight': 1, 'max_depth': 6, 'gamma': 0, 'colsample_bytree': 1.0}	{'subsample': 1.0, 'min_child_weight': 1, 'max_depth': 6, 'gamma': 0, 'colsample_bytree': 1.0}	{'subsample': 1.0, 'min_child_weight': 1, 'max_depth': 6, 'gamma': 0, 'colsample_bytree': 1.0}	{'subsample': 1.0, 'min_child_weight': 1, 'max_depth': 6, 'gamma': 0, 'colsample_bytree': 1.0}	{'subsample': 1.0, 'min_child_weight': 1, 'max_depth': 6, 'gamma': 0, 'colsample_bytree': 1.0}	{'subsample': 1.0, 'min_child_weight': 1, 'max_depth': 6, 'gamma': 0, 'colsample_bytree': 1.0}
	RF	1	1	{'n_estimators': 3000}	{'n_estimators': 100}	{'n_estimators': 500}	{'n_estimators': 3000}	{'n_estimators': 100}	{'n_estimators': 500}	{'n_estimators': 500}	{'n_estimators': 500}
	RF	1	2	{'n_estimators': 1000}	{'n_estimators': 100}	{'n_estimators': 3000}	{'n_estimators': 3000}	{'n_estimators': 100}	{'n_estimators': 100}	{'n_estimators': 100}	{'n_estimators': 3000}
	RF	2	1	{'n_estimators': 3000}	{'n_estimators': 100}	{'n_estimators': 1000}	{'n_estimators': 3000}	{'n_estimators': 3000}	{'n_estimators': 500}	{'n_estimators': 100}	{'n_estimators': 1000}
	RF	2	2	{'n_estimators': 100}	{'n_estimators': 100}	{'n_estimators': 100}	{'n_estimators': 3000}	{'n_estimators': 1000}	{'n_estimators': 1000}	{'n_estimators': 500}	{'n_estimators': 100}
	RF	3	1	{'n_estimators': 100}	{'n_estimators': 100}	{'n_estimators': 1000}	{'n_estimators': 500}	{'n_estimators': 100}	{'n_estimators': 1000}	{'n_estimators': 500}	{'n_estimators': 1000}
	RF	3	2	{'n_estimators': 1000}	{'n_estimators': 100}	{'n_estimators': 500}	{'n_estimators': 100}	{'n_estimators': 100}	{'n_estimators': 100}	{'n_estimators': 500}	{'n_estimators': 500}
	RF	4	1	{'n_estimators': 500}	{'n_estimators': 100}	{'n_estimators': 1000}	{'n_estimators': 3000}	{'n_estimators': 3000}	{'n_estimators': 1000}	{'n_estimators': 500}	{'n_estimators': 1000}
	RF	4	2	{'n_estimators': 1000}	{'n_estimators': 100}	{'n_estimators': 3000}	{'n_estimators': 3000}	{'n_estimators': 100}	{'n_estimators': 3000}	{'n_estimators': 500}	{'n_estimators': 3000}
	RF	5	1	{'n_estimators': 3000}	{'n_estimators': 100}	{'n_estimators': 3000}	{'n_estimators': 100}	{'n_estimators': 100}	{'n_estimators': 100}	{'n_estimators': 100}	{'n_estimators': 3000}
	RF	5	2	{'n_estimators': 3000}	{'n_estimators': 100}	{'n_estimators': 3000}	{'n_estimators': 3000}	{'n_estimators': 100}	{'n_estimators': 500}	{'n_estimators': 3000}	{'n_estimators': 3000}
	SVM	1	1	{'gamma': 1.0, 'C': 10}	{'gamma': 1.0, 'C': 10}	{'gamma': 1.0, 'C': 10}	{'gamma': 1.0, 'C': 10}	{'gamma': 0.01, 'C': 1}	{'gamma': 1.0, 'C': 10}	{'gamma': 1.0, 'C': 10}	{'gamma': 1.0, 'C': 10}
	SVM	1	2	{'gamma': 1.0, 'C': 10}	{'gamma': 1.0, 'C': 10}	{'gamma': 1.0, 'C': 10}	{'gamma': 1.0, 'C': 10}	{'gamma': 1.0, 'C': 10}	{'gamma': 0.01, 'C': 0.1}	{'gamma': 0.01, 'C': 0.1}	{'gamma': 1.0, 'C': 10}
	SVM	2	1	{'gamma': 1.0, 'C': 10}	{'gamma': 1.0, 'C': 10}	{'gamma': 1.0, 'C': 10}	{'gamma': 1.0, 'C': 10}	{'gamma': 0.01, 'C': 1}	{'gamma': 1.0, 'C': 10}	{'gamma': 1.0, 'C': 10}	{'gamma': 1.0, 'C': 10}
	SVM	2	2	{'gamma': 0.01, 'C': 1}	{'gamma': 1.0, 'C': 10}	{'gamma': 1.0, 'C': 10}	{'gamma': 1.0, 'C': 10}	{'gamma': 0.01, 'C': 1}	{'gamma': 0.01, 'C': 0.1}	{'gamma': 0.01, 'C': 1}	{'gamma': 1.0, 'C': 10}
	SVM	3	1	{'gamma': 1.0, 'C': 10}	{'gamma': 1.0, 'C': 10}	{'gamma': 1.0, 'C': 10}	{'gamma': 1.0, 'C': 10}	{'gamma': 1.0, 'C': 10}	{'gamma': 1.0, 'C': 10}	{'gamma': 0.01, 'C': 1}	{'gamma': 1.0, 'C': 10}
	SVM	3	2	{'gamma': 0.01, 'C': 1}	{'gamma': 1.0, 'C': 10}	{'gamma': 1.0, 'C': 10}	{'gamma': 1.0, 'C': 10}	{'gamma': 0.01, 'C': 1}	{'gamma': 0.01, 'C': 0.1}	{'gamma': 1.0, 'C': 10}	{'gamma': 1.0, 'C': 10}
	SVM	4	1	{'gamma': 0.01, 'C': 0.1}	{'gamma': 1.0, 'C': 10}	{'gamma': 1.0, 'C': 10}	{'gamma': 1.0, 'C': 10}	{'gamma': 1.0, 'C': 10}	{'gamma': 1.0, 'C': 10}	{'gamma': 1.0, 'C': 10}	{'gamma': 1.0, 'C': 10}
	SVM	4	2	{'gamma': 1.0, 'C': 10}	{'gamma': 1.0, 'C': 10}	{'gamma': 1.0, 'C': 10}	{'gamma': 1.0, 'C': 10}	{'gamma': 1.0, 'C': 10}	{'gamma': 0.01, 'C': 1}	{'gamma': 1.0, 'C': 10}	{'gamma': 1.0, 'C': 10}
	SVM	5	1	{'gamma': 1.0, 'C': 10}	{'gamma': 1.0, 'C': 10}	{'gamma': 1.0, 'C': 10}	{'gamma': 1.0, 'C': 10}	{'gamma': 1.0, 'C': 10}	{'gamma': 0.01, 'C': 1}	{'gamma': 0.01, 'C': 1}	{'gamma': 1.0, 'C': 10}
	SVM	5	2	{'gamma': 0.01, 'C': 1}	{'gamma': 1.0, 'C': 10}	{'gamma': 1.0, 'C': 10}	{'gamma': 1.0, 'C': 10}	{'gamma': 0.01, 'C': 1}	{'gamma': 0.01, 'C': 1}	{'gamma': 1.0, 'C': 10}	{'gamma': 1.0, 'C': 10}
	LDA	1	1
	LDA	1	2
	LDA	2	1
	LDA	2	2
	LDA	3	1
	LDA	3	2
	LDA	4	1
	LDA	4	2
	LDA	5	1
	LDA	5	2
	Lasso	1	1	{'C': 1}	{'C': 0.1}	{'C': 10}	{'C': 10}	{'C': 0.1}	{'C': 10}	{'C': 1}	{'C': 10}
	Lasso	1	2	{'C': 0.1}	{'C': 0.1}	{'C': 10}	{'C': 10}	{'C': 0.1}	{'C': 10}	{'C': 10}	{'C': 10}
	Lasso	2	1	{'C': 1}	{'C': 0.1}	{'C': 0.1}	{'C': 0.1}	{'C': 0.1}	{'C': 1}	{'C': 1}	{'C': 0.1}
	Lasso	2	2	{'C': 10}	{'C': 1}	{'C': 10}	{'C': 10}	{'C': 1}	{'C': 1}	{'C': 1}	{'C': 10}
	Lasso	3	1	{'C': 1}	{'C': 10}	{'C': 0.1}	{'C': 0.1}	{'C': 0.1}	{'C': 1}	{'C': 10}	{'C': 0.1}
	Lasso	3	2	{'C': 1}	{'C': 1}	{'C': 1}	{'C': 10}	{'C': 1}	{'C': 1}	{'C': 10}	{'C': 1}
	Lasso	4	1	{'C': 0.1}	{'C': 0.1}	{'C': 0.1}	{'C': 0.1}	{'C': 1}	{'C': 1}	{'C': 10}	{'C': 0.1}
	Lasso	4	2	{'C': 10}	{'C': 10}	{'C': 10}	{'C': 10}	{'C': 0.1}	{'C': 10}	{'C': 10}	{'C': 10}
	Lasso	5	1	{'C': 0.1}	{'C': 0.1}	{'C': 10}	{'C': 10}	{'C': 0.1}	{'C': 1}	{'C': 1}	{'C': 10}
	Lasso	5	2	{'C': 0.1}	{'C': 0.1}	{'C': 0.1}	{'C': 0.1}	{'C': 0.1}	{'C': 1}	{'C': 10}	{'C': 0.1}
	Ridge	1	1	{'C': 0.1}	{'C': 0.1}	{'C': 10}	{'C': 10}	{'C': 0.1}	{'C': 1}	{'C': 10}	{'C': 10}
	Ridge	1	2	{'C': 10}	{'C': 0.1}	{'C': 0.1}	{'C': 0.1}	{'C': 0.1}	{'C': 1}	{'C': 0.1}	{'C': 0.1}
	Ridge	2	1	{'C': 0.1}	{'C': 0.1}	{'C': 0.1}	{'C': 0.1}	{'C': 0.1}	{'C': 10}	{'C': 10}	{'C': 0.1}
	Ridge	2	2	{'C': 10}	{'C': 10}	{'C': 10}	{'C': 10}	{'C': 0.1}	{'C': 10}	{'C': 0.1}	{'C': 10}
	Ridge	3	1	{'C': 10}	{'C': 1}	{'C': 0.1}	{'C': 0.1}	{'C': 0.1}	{'C': 1}	{'C': 0.1}	{'C': 0.1}
	Ridge	3	2	{'C': 1}	{'C': 0.1}	{'C': 0.1}	{'C': 10}	{'C': 0.1}	{'C': 10}	{'C': 10}	{'C': 0.1}
	Ridge	4	1	{'C': 0.1}	{'C': 0.1}	{'C': 10}	{'C': 0.1}	{'C': 0.1}	{'C': 1}	{'C': 10}	{'C': 10}
	Ridge	4	2	{'C': 0.1}	{'C': 0.1}	{'C': 10}	{'C': 10}	{'C': 0.1}	{'C': 10}	{'C': 1}	{'C': 10}
	Ridge	5	1	{'C': 1}	{'C': 0.1}	{'C': 0.1}	{'C': 0.1}	{'C': 10}	{'C': 10}	{'C': 10}	{'C': 0.1}
	Ridge	5	2	{'C': 0.1}	{'C': 0.1}	{'C': 0.1}	{'C': 0.1}	{'C': 0.1}	{'C': 0.1}	{'C': 1}	{'C': 0.1}
	ElasticNet	1	1	{'C': 0.1}	{'C': 0.1}	{'C': 10}	{'C': 10}	{'C': 0.1}	{'C': 10}	{'C': 1}	{'C': 10}
	ElasticNet	1	2	{'C': 0.1}	{'C': 0.1}	{'C': 0.1}	{'C': 0.1}	{'C': 0.1}	{'C': 1}	{'C': 10}	{'C': 0.1}
	ElasticNet	2	1	{'C': 0.1}	{'C': 0.1}	{'C': 0.1}	{'C': 0.1}	{'C': 0.1}	{'C': 10}	{'C': 1}	{'C': 0.1}
	ElasticNet	2	2	{'C': 10}	{'C': 10}	{'C': 10}	{'C': 10}	{'C': 0.1}	{'C': 1}	{'C': 1}	{'C': 10}
	ElasticNet	3	1	{'C': 0.1}	{'C': 10}	{'C': 0.1}	{'C': 0.1}	{'C': 0.1}	{'C': 1}	{'C': 1}	{'C': 0.1}
	ElasticNet	3	2	{'C': 0.1}	{'C': 0.1}	{'C': 0.1}	{'C': 0.1}	{'C': 0.1}	{'C': 0.1}	{'C': 10}	{'C': 0.1}
	ElasticNet	4	1	{'C': 0.1}	{'C': 0.1}	{'C': 0.1}	{'C': 0.1}	{'C': 1}	{'C': 0.1}	{'C': 10}	{'C': 0.1}
	ElasticNet	4	2	{'C': 1}	{'C': 10}	{'C': 10}	{'C': 10}	{'C': 0.1}	{'C': 10}	{'C': 1}	{'C': 10}
	ElasticNet	5	1	{'C': 0.1}	{'C': 0.1}	{'C': 10}	{'C': 0.1}	{'C': 0.1}	{'C': 1}	{'C': 10}	{'C': 10}
	ElasticNet	5	2	{'C': 0.1}	{'C': 0.1}	{'C': 0.1}	{'C': 0.1}	{'C': 0.1}	{'C': 0.1}	{'C': 1}	{'C': 0.1}

## Sheet: 8. Yeast4
	Algorithm	Iteration	Fold	Without Sampling	O_Random	O_SMOTE	O_Border	U_Random	U_Condensed	U_NearMiss	SMOTETomek
	AdaBoost	1	1	{'n_estimators': 500, 'learning_rate': 0.01}	{'n_estimators': 50, 'learning_rate': 1.0}	{'n_estimators': 50, 'learning_rate': 1.0}	{'n_estimators': 10, 'learning_rate': 1.0}	{'n_estimators': 500, 'learning_rate': 0.01}	{'n_estimators': 500, 'learning_rate': 0.01}	{'n_estimators': 50, 'learning_rate': 1.0}	{'n_estimators': 50, 'learning_rate': 1.0}
	AdaBoost	1	2	{'n_estimators': 10, 'learning_rate': 1.0}	{'n_estimators': 50, 'learning_rate': 1.0}	{'n_estimators': 50, 'learning_rate': 1.0}	{'n_estimators': 50, 'learning_rate': 1.0}	{'n_estimators': 10, 'learning_rate': 1.0}	{'n_estimators': 500, 'learning_rate': 0.01}	{'n_estimators': 50, 'learning_rate': 1.0}	{'n_estimators': 50, 'learning_rate': 1.0}
	AdaBoost	2	1	{'n_estimators': 50, 'learning_rate': 1.0}	{'n_estimators': 50, 'learning_rate': 1.0}	{'n_estimators': 50, 'learning_rate': 1.0}	{'n_estimators': 50, 'learning_rate': 1.0}	{'n_estimators': 500, 'learning_rate': 0.01}	{'n_estimators': 10, 'learning_rate': 0.01}	{'n_estimators': 10, 'learning_rate': 1.0}	{'n_estimators': 50, 'learning_rate': 1.0}
	AdaBoost	2	2	{'n_estimators': 10, 'learning_rate': 1.0}	{'n_estimators': 50, 'learning_rate': 1.0}	{'n_estimators': 50, 'learning_rate': 1.0}	{'n_estimators': 50, 'learning_rate': 1.0}	{'n_estimators': 500, 'learning_rate': 0.01}	{'n_estimators': 500, 'learning_rate': 0.01}	{'n_estimators': 500, 'learning_rate': 0.01}	{'n_estimators': 50, 'learning_rate': 1.0}
	AdaBoost	3	1	{'n_estimators': 500, 'learning_rate': 0.01}	{'n_estimators': 50, 'learning_rate': 1.0}	{'n_estimators': 50, 'learning_rate': 1.0}	{'n_estimators': 50, 'learning_rate': 1.0}	{'n_estimators': 50, 'learning_rate': 1.0}	{'n_estimators': 10, 'learning_rate': 1.0}	{'n_estimators': 50, 'learning_rate': 1.0}	{'n_estimators': 50, 'learning_rate': 1.0}
	AdaBoost	3	2	{'n_estimators': 10, 'learning_rate': 1.0}	{'n_estimators': 50, 'learning_rate': 1.0}	{'n_estimators': 50, 'learning_rate': 1.0}	{'n_estimators': 50, 'learning_rate': 1.0}	{'n_estimators': 500, 'learning_rate': 0.01}	{'n_estimators': 10, 'learning_rate': 0.01}	{'n_estimators': 50, 'learning_rate': 1.0}	{'n_estimators': 50, 'learning_rate': 1.0}
	AdaBoost	4	1	{'n_estimators': 500, 'learning_rate': 0.01}	{'n_estimators': 50, 'learning_rate': 1.0}	{'n_estimators': 50, 'learning_rate': 1.0}	{'n_estimators': 50, 'learning_rate': 1.0}	{'n_estimators': 10, 'learning_rate': 1.0}	{'n_estimators': 500, 'learning_rate': 0.01}	{'n_estimators': 50, 'learning_rate': 1.0}	{'n_estimators': 50, 'learning_rate': 1.0}
	AdaBoost	4	2	{'n_estimators': 500, 'learning_rate': 0.01}	{'n_estimators': 50, 'learning_rate': 1.0}	{'n_estimators': 500, 'learning_rate': 0.01}	{'n_estimators': 500, 'learning_rate': 0.01}	{'n_estimators': 500, 'learning_rate': 0.01}	{'n_estimators': 10, 'learning_rate': 1.0}	{'n_estimators': 50, 'learning_rate': 1.0}	{'n_estimators': 50, 'learning_rate': 1.0}
	AdaBoost	5	1	{'n_estimators': 500, 'learning_rate': 0.01}	{'n_estimators': 50, 'learning_rate': 1.0}	{'n_estimators': 50, 'learning_rate': 1.0}	{'n_estimators': 50, 'learning_rate': 1.0}	{'n_estimators': 500, 'learning_rate': 0.01}	{'n_estimators': 10, 'learning_rate': 0.01}	{'n_estimators': 50, 'learning_rate': 1.0}	{'n_estimators': 50, 'learning_rate': 1.0}
	AdaBoost	5	2	{'n_estimators': 50, 'learning_rate': 1.0}	{'n_estimators': 50, 'learning_rate': 1.0}	{'n_estimators': 50, 'learning_rate': 1.0}	{'n_estimators': 500, 'learning_rate': 0.01}	{'n_estimators': 500, 'learning_rate': 0.01}	{'n_estimators': 500, 'learning_rate': 0.01}	{'n_estimators': 500, 'learning_rate': 0.01}	{'n_estimators': 50, 'learning_rate': 1.0}
	XGBoost	1	1	{'subsample': 1.0, 'min_child_weight': 1, 'max_depth': 6, 'gamma': 0, 'colsample_bytree': 1.0}	{'subsample': 1.0, 'min_child_weight': 1, 'max_depth': 6, 'gamma': 0, 'colsample_bytree': 1.0}	{'subsample': 1.0, 'min_child_weight': 1, 'max_depth': 6, 'gamma': 0, 'colsample_bytree': 1.0}	{'subsample': 0.6, 'min_child_weight': 5, 'max_depth': 5, 'gamma': 0, 'colsample_bytree': 0.8}	{'subsample': 1.0, 'min_child_weight': 1, 'max_depth': 6, 'gamma': 0, 'colsample_bytree': 1.0}	{'subsample': 1.0, 'min_child_weight': 1, 'max_depth': 6, 'gamma': 0, 'colsample_bytree': 1.0}	{'subsample': 1.0, 'min_child_weight': 1, 'max_depth': 6, 'gamma': 0, 'colsample_bytree': 1.0}	{'subsample': 1.0, 'min_child_weight': 1, 'max_depth': 6, 'gamma': 0, 'colsample_bytree': 1.0}
	XGBoost	1	2	{'subsample': 1.0, 'min_child_weight': 1, 'max_depth': 6, 'gamma': 0, 'colsample_bytree': 1.0}	{'subsample': 1.0, 'min_child_weight': 1, 'max_depth': 6, 'gamma': 0, 'colsample_bytree': 1.0}	{'subsample': 1.0, 'min_child_weight': 1, 'max_depth': 6, 'gamma': 0, 'colsample_bytree': 1.0}	{'subsample': 0.6, 'min_child_weight': 5, 'max_depth': 5, 'gamma': 0, 'colsample_bytree': 0.8}	{'subsample': 1.0, 'min_child_weight': 1, 'max_depth': 6, 'gamma': 0, 'colsample_bytree': 1.0}	{'subsample': 1.0, 'min_child_weight': 1, 'max_depth': 6, 'gamma': 0, 'colsample_bytree': 1.0}	{'subsample': 1.0, 'min_child_weight': 1, 'max_depth': 6, 'gamma': 0, 'colsample_bytree': 1.0}	{'subsample': 1.0, 'min_child_weight': 1, 'max_depth': 6, 'gamma': 0, 'colsample_bytree': 1.0}
	XGBoost	2	1	{'subsample': 0.6, 'min_child_weight': 5, 'max_depth': 5, 'gamma': 0, 'colsample_bytree': 0.8}	{'subsample': 1.0, 'min_child_weight': 1, 'max_depth': 6, 'gamma': 0, 'colsample_bytree': 1.0}	{'subsample': 1.0, 'min_child_weight': 1, 'max_depth': 6, 'gamma': 0, 'colsample_bytree': 1.0}	{'subsample': 1.0, 'min_child_weight': 1, 'max_depth': 6, 'gamma': 0, 'colsample_bytree': 1.0}	{'subsample': 1.0, 'min_child_weight': 1, 'max_depth': 6, 'gamma': 0, 'colsample_bytree': 1.0}	{'subsample': 0.6, 'min_child_weight': 5, 'max_depth': 5, 'gamma': 0, 'colsample_bytree': 0.8}	{'subsample': 1.0, 'min_child_weight': 1, 'max_depth': 6, 'gamma': 0, 'colsample_bytree': 1.0}	{'subsample': 1.0, 'min_child_weight': 1, 'max_depth': 6, 'gamma': 0, 'colsample_bytree': 1.0}
	XGBoost	2	2	{'subsample': 1.0, 'min_child_weight': 1, 'max_depth': 6, 'gamma': 0, 'colsample_bytree': 1.0}	{'subsample': 1.0, 'min_child_weight': 1, 'max_depth': 6, 'gamma': 0, 'colsample_bytree': 1.0}	{'subsample': 1.0, 'min_child_weight': 1, 'max_depth': 6, 'gamma': 0, 'colsample_bytree': 1.0}	{'subsample': 0.6, 'min_child_weight': 5, 'max_depth': 5, 'gamma': 0, 'colsample_bytree': 0.8}	{'subsample': 1.0, 'min_child_weight': 1, 'max_depth': 6, 'gamma': 0, 'colsample_bytree': 1.0}	{'subsample': 1.0, 'min_child_weight': 1, 'max_depth': 6, 'gamma': 0, 'colsample_bytree': 1.0}	{'subsample': 1.0, 'min_child_weight': 1, 'max_depth': 6, 'gamma': 0, 'colsample_bytree': 1.0}	{'subsample': 1.0, 'min_child_weight': 1, 'max_depth': 6, 'gamma': 0, 'colsample_bytree': 1.0}
	XGBoost	3	1	{'subsample': 1.0, 'min_child_weight': 1, 'max_depth': 6, 'gamma': 0, 'colsample_bytree': 1.0}	{'subsample': 1.0, 'min_child_weight': 1, 'max_depth': 6, 'gamma': 0, 'colsample_bytree': 1.0}	{'subsample': 0.6, 'min_child_weight': 5, 'max_depth': 5, 'gamma': 0, 'colsample_bytree': 0.8}	{'subsample': 0.6, 'min_child_weight': 5, 'max_depth': 5, 'gamma': 0, 'colsample_bytree': 0.8}	{'subsample': 1.0, 'min_child_weight': 1, 'max_depth': 6, 'gamma': 0, 'colsample_bytree': 1.0}	{'subsample': 1.0, 'min_child_weight': 1, 'max_depth': 6, 'gamma': 0, 'colsample_bytree': 1.0}	{'subsample': 1.0, 'min_child_weight': 1, 'max_depth': 6, 'gamma': 0, 'colsample_bytree': 1.0}	{'subsample': 0.6, 'min_child_weight': 5, 'max_depth': 5, 'gamma': 0, 'colsample_bytree': 0.8}
	XGBoost	3	2	{'subsample': 1.0, 'min_child_weight': 1, 'max_depth': 6, 'gamma': 0, 'colsample_bytree': 1.0}	{'subsample': 1.0, 'min_child_weight': 1, 'max_depth': 6, 'gamma': 0, 'colsample_bytree': 1.0}	{'subsample': 1.0, 'min_child_weight': 1, 'max_depth': 6, 'gamma': 0, 'colsample_bytree': 1.0}	{'subsample': 0.6, 'min_child_weight': 5, 'max_depth': 5, 'gamma': 0, 'colsample_bytree': 0.8}	{'subsample': 1.0, 'min_child_weight': 1, 'max_depth': 6, 'gamma': 0, 'colsample_bytree': 1.0}	{'subsample': 1.0, 'min_child_weight': 1, 'max_depth': 6, 'gamma': 0, 'colsample_bytree': 1.0}	{'subsample': 1.0, 'min_child_weight': 1, 'max_depth': 6, 'gamma': 0, 'colsample_bytree': 1.0}	{'subsample': 1.0, 'min_child_weight': 1, 'max_depth': 6, 'gamma': 0, 'colsample_bytree': 1.0}
	XGBoost	4	1	{'subsample': 1.0, 'min_child_weight': 1, 'max_depth': 6, 'gamma': 0, 'colsample_bytree': 1.0}	{'subsample': 1.0, 'min_child_weight': 1, 'max_depth': 6, 'gamma': 0, 'colsample_bytree': 1.0}	{'subsample': 1.0, 'min_child_weight': 1, 'max_depth': 6, 'gamma': 0, 'colsample_bytree': 1.0}	{'subsample': 1.0, 'min_child_weight': 1, 'max_depth': 6, 'gamma': 0, 'colsample_bytree': 1.0}	{'subsample': 1.0, 'min_child_weight': 1, 'max_depth': 6, 'gamma': 0, 'colsample_bytree': 1.0}	{'subsample': 1.0, 'min_child_weight': 1, 'max_depth': 6, 'gamma': 0, 'colsample_bytree': 1.0}	{'subsample': 1.0, 'min_child_weight': 1, 'max_depth': 6, 'gamma': 0, 'colsample_bytree': 1.0}	{'subsample': 1.0, 'min_child_weight': 1, 'max_depth': 6, 'gamma': 0, 'colsample_bytree': 1.0}
	XGBoost	4	2	{'subsample': 1.0, 'min_child_weight': 1, 'max_depth': 6, 'gamma': 0, 'colsample_bytree': 1.0}	{'subsample': 1.0, 'min_child_weight': 1, 'max_depth': 6, 'gamma': 0, 'colsample_bytree': 1.0}	{'subsample': 1.0, 'min_child_weight': 1, 'max_depth': 6, 'gamma': 0, 'colsample_bytree': 1.0}	{'subsample': 1.0, 'min_child_weight': 1, 'max_depth': 6, 'gamma': 0, 'colsample_bytree': 1.0}	{'subsample': 1.0, 'min_child_weight': 1, 'max_depth': 6, 'gamma': 0, 'colsample_bytree': 1.0}	{'subsample': 1.0, 'min_child_weight': 1, 'max_depth': 6, 'gamma': 0, 'colsample_bytree': 1.0}	{'subsample': 1.0, 'min_child_weight': 1, 'max_depth': 6, 'gamma': 0, 'colsample_bytree': 1.0}	{'subsample': 1.0, 'min_child_weight': 1, 'max_depth': 6, 'gamma': 0, 'colsample_bytree': 1.0}
	XGBoost	5	1	{'subsample': 1.0, 'min_child_weight': 1, 'max_depth': 6, 'gamma': 0, 'colsample_bytree': 1.0}	{'subsample': 1.0, 'min_child_weight': 1, 'max_depth': 6, 'gamma': 0, 'colsample_bytree': 1.0}	{'subsample': 1.0, 'min_child_weight': 1, 'max_depth': 6, 'gamma': 0, 'colsample_bytree': 1.0}	{'subsample': 1.0, 'min_child_weight': 1, 'max_depth': 6, 'gamma': 0, 'colsample_bytree': 1.0}	{'subsample': 1.0, 'min_child_weight': 1, 'max_depth': 6, 'gamma': 0, 'colsample_bytree': 1.0}	{'subsample': 1.0, 'min_child_weight': 1, 'max_depth': 6, 'gamma': 0, 'colsample_bytree': 1.0}	{'subsample': 1.0, 'min_child_weight': 1, 'max_depth': 6, 'gamma': 0, 'colsample_bytree': 1.0}	{'subsample': 1.0, 'min_child_weight': 1, 'max_depth': 6, 'gamma': 0, 'colsample_bytree': 1.0}
	XGBoost	5	2	{'subsample': 1.0, 'min_child_weight': 1, 'max_depth': 6, 'gamma': 0, 'colsample_bytree': 1.0}	{'subsample': 1.0, 'min_child_weight': 1, 'max_depth': 6, 'gamma': 0, 'colsample_bytree': 1.0}	{'subsample': 1.0, 'min_child_weight': 1, 'max_depth': 6, 'gamma': 0, 'colsample_bytree': 1.0}	{'subsample': 1.0, 'min_child_weight': 1, 'max_depth': 6, 'gamma': 0, 'colsample_bytree': 1.0}	{'subsample': 1.0, 'min_child_weight': 1, 'max_depth': 6, 'gamma': 0, 'colsample_bytree': 1.0}	{'subsample': 1.0, 'min_child_weight': 1, 'max_depth': 6, 'gamma': 0, 'colsample_bytree': 1.0}	{'subsample': 1.0, 'min_child_weight': 1, 'max_depth': 6, 'gamma': 0, 'colsample_bytree': 1.0}	{'subsample': 1.0, 'min_child_weight': 1, 'max_depth': 6, 'gamma': 0, 'colsample_bytree': 1.0}
	RF	1	1	{'n_estimators': 100}	{'n_estimators': 100}	{'n_estimators': 1000}	{'n_estimators': 1000}	{'n_estimators': 3000}	{'n_estimators': 100}	{'n_estimators': 500}	{'n_estimators': 500}
	RF	1	2	{'n_estimators': 1000}	{'n_estimators': 100}	{'n_estimators': 3000}	{'n_estimators': 3000}	{'n_estimators': 1000}	{'n_estimators': 100}	{'n_estimators': 500}	{'n_estimators': 3000}
	RF	2	1	{'n_estimators': 3000}	{'n_estimators': 100}	{'n_estimators': 3000}	{'n_estimators': 3000}	{'n_estimators': 1000}	{'n_estimators': 500}	{'n_estimators': 500}	{'n_estimators': 3000}
	RF	2	2	{'n_estimators': 3000}	{'n_estimators': 100}	{'n_estimators': 500}	{'n_estimators': 3000}	{'n_estimators': 100}	{'n_estimators': 500}	{'n_estimators': 1000}	{'n_estimators': 3000}
	RF	3	1	{'n_estimators': 500}	{'n_estimators': 100}	{'n_estimators': 1000}	{'n_estimators': 500}	{'n_estimators': 500}	{'n_estimators': 100}	{'n_estimators': 3000}	{'n_estimators': 3000}
	RF	3	2	{'n_estimators': 100}	{'n_estimators': 100}	{'n_estimators': 1000}	{'n_estimators': 500}	{'n_estimators': 3000}	{'n_estimators': 500}	{'n_estimators': 3000}	{'n_estimators': 1000}
	RF	4	1	{'n_estimators': 500}	{'n_estimators': 100}	{'n_estimators': 3000}	{'n_estimators': 3000}	{'n_estimators': 1000}	{'n_estimators': 100}	{'n_estimators': 500}	{'n_estimators': 3000}
	RF	4	2	{'n_estimators': 100}	{'n_estimators': 100}	{'n_estimators': 500}	{'n_estimators': 3000}	{'n_estimators': 1000}	{'n_estimators': 3000}	{'n_estimators': 100}	{'n_estimators': 3000}
	RF	5	1	{'n_estimators': 1000}	{'n_estimators': 100}	{'n_estimators': 500}	{'n_estimators': 500}	{'n_estimators': 100}	{'n_estimators': 1000}	{'n_estimators': 100}	{'n_estimators': 500}
	RF	5	2	{'n_estimators': 1000}	{'n_estimators': 100}	{'n_estimators': 500}	{'n_estimators': 100}	{'n_estimators': 1000}	{'n_estimators': 1000}	{'n_estimators': 100}	{'n_estimators': 500}
	SVM	1	1	{'gamma': 0.01, 'C': 0.1}	{'gamma': 1.0, 'C': 10}	{'gamma': 1.0, 'C': 10}	{'gamma': 1.0, 'C': 10}	{'gamma': 0.01, 'C': 1}	{'gamma': 0.01, 'C': 0.1}	{'gamma': 1.0, 'C': 10}	{'gamma': 1.0, 'C': 10}
	SVM	1	2	{'gamma': 1.0, 'C': 10}	{'gamma': 1.0, 'C': 10}	{'gamma': 1.0, 'C': 10}	{'gamma': 1.0, 'C': 10}	{'gamma': 0.01, 'C': 0.1}	{'gamma': 0.01, 'C': 1}	{'gamma': 1.0, 'C': 10}	{'gamma': 1.0, 'C': 10}
	SVM	2	1	{'gamma': 0.01, 'C': 0.1}	{'gamma': 1.0, 'C': 10}	{'gamma': 1.0, 'C': 10}	{'gamma': 1.0, 'C': 10}	{'gamma': 0.01, 'C': 1}	{'gamma': 0.01, 'C': 1}	{'gamma': 1.0, 'C': 10}	{'gamma': 1.0, 'C': 10}
	SVM	2	2	{'gamma': 0.01, 'C': 1}	{'gamma': 1.0, 'C': 10}	{'gamma': 1.0, 'C': 10}	{'gamma': 1.0, 'C': 10}	{'gamma': 0.01, 'C': 1}	{'gamma': 0.01, 'C': 1}	{'gamma': 1.0, 'C': 10}	{'gamma': 1.0, 'C': 10}
	SVM	3	1	{'gamma': 1.0, 'C': 10}	{'gamma': 1.0, 'C': 10}	{'gamma': 1.0, 'C': 10}	{'gamma': 1.0, 'C': 10}	{'gamma': 0.01, 'C': 1}	{'gamma': 0.01, 'C': 1}	{'gamma': 1.0, 'C': 10}	{'gamma': 1.0, 'C': 10}
	SVM	3	2	{'gamma': 0.01, 'C': 0.1}	{'gamma': 1.0, 'C': 10}	{'gamma': 1.0, 'C': 10}	{'gamma': 1.0, 'C': 10}	{'gamma': 0.01, 'C': 1}	{'gamma': 0.01, 'C': 0.1}	{'gamma': 1.0, 'C': 10}	{'gamma': 1.0, 'C': 10}
	SVM	4	1	{'gamma': 1.0, 'C': 10}	{'gamma': 1.0, 'C': 10}	{'gamma': 1.0, 'C': 10}	{'gamma': 1.0, 'C': 10}	{'gamma': 1.0, 'C': 10}	{'gamma': 1.0, 'C': 10}	{'gamma': 1.0, 'C': 10}	{'gamma': 1.0, 'C': 10}
	SVM	4	2	{'gamma': 1.0, 'C': 10}	{'gamma': 1.0, 'C': 10}	{'gamma': 1.0, 'C': 10}	{'gamma': 1.0, 'C': 10}	{'gamma': 0.01, 'C': 1}	{'gamma': 0.01, 'C': 0.1}	{'gamma': 1.0, 'C': 10}	{'gamma': 1.0, 'C': 10}
	SVM	5	1	{'gamma': 0.01, 'C': 0.1}	{'gamma': 1.0, 'C': 10}	{'gamma': 1.0, 'C': 10}	{'gamma': 1.0, 'C': 10}	{'gamma': 0.01, 'C': 0.1}	{'gamma': 0.01, 'C': 1}	{'gamma': 1.0, 'C': 10}	{'gamma': 1.0, 'C': 10}
	SVM	5	2	{'gamma': 0.01, 'C': 1}	{'gamma': 1.0, 'C': 10}	{'gamma': 1.0, 'C': 10}	{'gamma': 1.0, 'C': 10}	{'gamma': 0.01, 'C': 0.1}	{'gamma': 1.0, 'C': 10}	{'gamma': 1.0, 'C': 10}	{'gamma': 1.0, 'C': 10}
	LDA	1	1
	LDA	1	2
	LDA	2	1
	LDA	2	2
	LDA	3	1
	LDA	3	2
	LDA	4	1
	LDA	4	2
	LDA	5	1
	LDA	5	2
	Lasso	1	1	{'C': 10}	{'C': 10}	{'C': 10}	{'C': 10}	{'C': 10}	{'C': 10}	{'C': 1}	{'C': 10}
	Lasso	1	2	{'C': 10}	{'C': 10}	{'C': 0.1}	{'C': 0.1}	{'C': 1}	{'C': 1}	{'C': 10}	{'C': 0.1}
	Lasso	2	1	{'C': 10}	{'C': 1}	{'C': 1}	{'C': 10}	{'C': 1}	{'C': 10}	{'C': 1}	{'C': 1}
	Lasso	2	2	{'C': 1}	{'C': 10}	{'C': 10}	{'C': 10}	{'C': 0.1}	{'C': 10}	{'C': 1}	{'C': 10}
	Lasso	3	1	{'C': 10}	{'C': 10}	{'C': 10}	{'C': 10}	{'C': 1}	{'C': 1}	{'C': 10}	{'C': 10}
	Lasso	3	2	{'C': 0.1}	{'C': 0.1}	{'C': 0.1}	{'C': 0.1}	{'C': 0.1}	{'C': 1}	{'C': 10}	{'C': 0.1}
	Lasso	4	1	{'C': 0.1}	{'C': 1}	{'C': 10}	{'C': 10}	{'C': 0.1}	{'C': 1}	{'C': 1}	{'C': 10}
	Lasso	4	2	{'C': 10}	{'C': 1}	{'C': 1}	{'C': 10}	{'C': 1}	{'C': 10}	{'C': 1}	{'C': 1}
	Lasso	5	1	{'C': 10}	{'C': 10}	{'C': 10}	{'C': 10}	{'C': 1}	{'C': 10}	{'C': 1}	{'C': 10}
	Lasso	5	2	{'C': 10}	{'C': 10}	{'C': 0.1}	{'C': 10}	{'C': 1}	{'C': 10}	{'C': 1}	{'C': 0.1}
	Ridge	1	1	{'C': 10}	{'C': 10}	{'C': 10}	{'C': 10}	{'C': 0.1}	{'C': 10}	{'C': 0.1}	{'C': 10}
	Ridge	1	2	{'C': 1}	{'C': 10}	{'C': 0.1}	{'C': 10}	{'C': 0.1}	{'C': 1}	{'C': 0.1}	{'C': 0.1}
	Ridge	2	1	{'C': 10}	{'C': 1}	{'C': 1}	{'C': 10}	{'C': 1}	{'C': 1}	{'C': 0.1}	{'C': 1}
	Ridge	2	2	{'C': 10}	{'C': 10}	{'C': 10}	{'C': 10}	{'C': 0.1}	{'C': 10}	{'C': 0.1}	{'C': 10}
	Ridge	3	1	{'C': 1}	{'C': 10}	{'C': 10}	{'C': 10}	{'C': 0.1}	{'C': 1}	{'C': 0.1}	{'C': 10}
	Ridge	3	2	{'C': 0.1}	{'C': 10}	{'C': 10}	{'C': 10}	{'C': 0.1}	{'C': 0.1}	{'C': 0.1}	{'C': 10}
	Ridge	4	1	{'C': 1}	{'C': 10}	{'C': 10}	{'C': 10}	{'C': 0.1}	{'C': 1}	{'C': 0.1}	{'C': 10}
	Ridge	4	2	{'C': 1}	{'C': 1}	{'C': 1}	{'C': 10}	{'C': 1}	{'C': 10}	{'C': 1}	{'C': 1}
	Ridge	5	1	{'C': 10}	{'C': 10}	{'C': 10}	{'C': 10}	{'C': 0.1}	{'C': 10}	{'C': 0.1}	{'C': 10}
	Ridge	5	2	{'C': 10}	{'C': 10}	{'C': 1}	{'C': 10}	{'C': 0.1}	{'C': 10}	{'C': 1}	{'C': 1}
	ElasticNet	1	1	{'C': 10}	{'C': 10}	{'C': 10}	{'C': 10}	{'C': 10}	{'C': 10}	{'C': 1}	{'C': 10}
	ElasticNet	1	2	{'C': 1}	{'C': 10}	{'C': 10}	{'C': 10}	{'C': 0.1}	{'C': 0.1}	{'C': 1}	{'C': 10}
	ElasticNet	2	1	{'C': 10}	{'C': 1}	{'C': 1}	{'C': 10}	{'C': 0.1}	{'C': 0.1}	{'C': 1}	{'C': 1}
	ElasticNet	2	2	{'C': 0.1}	{'C': 10}	{'C': 10}	{'C': 10}	{'C': 0.1}	{'C': 0.1}	{'C': 1}	{'C': 10}
	ElasticNet	3	1	{'C': 1}	{'C': 10}	{'C': 10}	{'C': 10}	{'C': 0.1}	{'C': 1}	{'C': 1}	{'C': 10}
	ElasticNet	3	2	{'C': 0.1}	{'C': 0.1}	{'C': 0.1}	{'C': 0.1}	{'C': 0.1}	{'C': 0.1}	{'C': 10}	{'C': 0.1}
	ElasticNet	4	1	{'C': 1}	{'C': 1}	{'C': 10}	{'C': 10}	{'C': 1}	{'C': 0.1}	{'C': 1}	{'C': 10}
	ElasticNet	4	2	{'C': 0.1}	{'C': 1}	{'C': 1}	{'C': 10}	{'C': 0.1}	{'C': 10}	{'C': 1}	{'C': 1}
	ElasticNet	5	1	{'C': 10}	{'C': 10}	{'C': 10}	{'C': 10}	{'C': 0.1}	{'C': 0.1}	{'C': 1}	{'C': 10}
	ElasticNet	5	2	{'C': 10}	{'C': 10}	{'C': 0.1}	{'C': 10}	{'C': 0.1}	{'C': 10}	{'C': 1}	{'C': 0.1}

## Sheet: 9. Fraud_Detection
	Algorithm	Iteration	Fold	Without Sampling	O_Random	O_SMOTE	O_Border	U_Random	U_Condensed	U_NearMiss	SMOTETomek
	AdaBoost	1	1	{'n_estimators': 500, 'learning_rate': 0.01}	{'n_estimators': 500, 'learning_rate': 0.01}	{'n_estimators': 500, 'learning_rate': 0.01}	{'n_estimators': 500, 'learning_rate': 0.01}	{'n_estimators': 500, 'learning_rate': 0.01}	{'n_estimators': 500, 'learning_rate': 0.01}	{'n_estimators': 500, 'learning_rate': 0.01}	{'n_estimators': 500, 'learning_rate': 0.01}
	AdaBoost	1	2	{'n_estimators': 500, 'learning_rate': 0.01}	{'n_estimators': 500, 'learning_rate': 0.01}	{'n_estimators': 500, 'learning_rate': 0.01}	{'n_estimators': 500, 'learning_rate': 0.01}	{'n_estimators': 500, 'learning_rate': 0.01}	{'n_estimators': 500, 'learning_rate': 0.01}	{'n_estimators': 500, 'learning_rate': 0.01}	{'n_estimators': 500, 'learning_rate': 0.01}
	AdaBoost	2	1	{'n_estimators': 500, 'learning_rate': 0.01}	{'n_estimators': 500, 'learning_rate': 0.01}	{'n_estimators': 500, 'learning_rate': 0.01}	{'n_estimators': 500, 'learning_rate': 0.01}	{'n_estimators': 500, 'learning_rate': 0.01}	{'n_estimators': 500, 'learning_rate': 0.01}	{'n_estimators': 500, 'learning_rate': 0.01}	{'n_estimators': 500, 'learning_rate': 0.01}
	AdaBoost	2	2	{'n_estimators': 500, 'learning_rate': 0.01}	{'n_estimators': 500, 'learning_rate': 0.01}	{'n_estimators': 500, 'learning_rate': 0.01}	{'n_estimators': 500, 'learning_rate': 0.01}	{'n_estimators': 500, 'learning_rate': 0.01}	{'n_estimators': 500, 'learning_rate': 0.01}	{'n_estimators': 500, 'learning_rate': 0.01}	{'n_estimators': 500, 'learning_rate': 0.01}
	AdaBoost	3	1	{'n_estimators': 500, 'learning_rate': 0.01}	{'n_estimators': 500, 'learning_rate': 0.01}	{'n_estimators': 500, 'learning_rate': 0.01}	{'n_estimators': 500, 'learning_rate': 0.01}	{'n_estimators': 500, 'learning_rate': 0.01}	{'n_estimators': 500, 'learning_rate': 0.01}	{'n_estimators': 500, 'learning_rate': 0.01}	{'n_estimators': 500, 'learning_rate': 0.01}
	AdaBoost	3	2	{'n_estimators': 500, 'learning_rate': 0.01}	{'n_estimators': 500, 'learning_rate': 0.01}	{'n_estimators': 500, 'learning_rate': 0.01}	{'n_estimators': 500, 'learning_rate': 0.01}	{'n_estimators': 500, 'learning_rate': 0.01}	{'n_estimators': 500, 'learning_rate': 0.01}	{'n_estimators': 500, 'learning_rate': 0.01}	{'n_estimators': 500, 'learning_rate': 0.01}
	AdaBoost	4	1	{'n_estimators': 500, 'learning_rate': 0.01}	{'n_estimators': 500, 'learning_rate': 0.01}	{'n_estimators': 500, 'learning_rate': 0.01}	{'n_estimators': 500, 'learning_rate': 0.01}	{'n_estimators': 500, 'learning_rate': 0.01}	{'n_estimators': 500, 'learning_rate': 0.01}	{'n_estimators': 500, 'learning_rate': 0.01}	{'n_estimators': 500, 'learning_rate': 0.01}
	AdaBoost	4	2	{'n_estimators': 500, 'learning_rate': 0.01}	{'n_estimators': 500, 'learning_rate': 0.01}	{'n_estimators': 500, 'learning_rate': 0.01}	{'n_estimators': 500, 'learning_rate': 0.01}	{'n_estimators': 500, 'learning_rate': 0.01}	{'n_estimators': 500, 'learning_rate': 0.01}	{'n_estimators': 500, 'learning_rate': 0.01}	{'n_estimators': 500, 'learning_rate': 0.01}
	AdaBoost	5	1	{'n_estimators': 500, 'learning_rate': 0.01}	{'n_estimators': 500, 'learning_rate': 0.01}	{'n_estimators': 500, 'learning_rate': 0.01}	{'n_estimators': 500, 'learning_rate': 0.01}	{'n_estimators': 500, 'learning_rate': 0.01}	{'n_estimators': 500, 'learning_rate': 0.01}	{'n_estimators': 500, 'learning_rate': 0.01}	{'n_estimators': 500, 'learning_rate': 0.01}
	AdaBoost	5	2	{'n_estimators': 500, 'learning_rate': 0.01}	{'n_estimators': 500, 'learning_rate': 0.01}	{'n_estimators': 500, 'learning_rate': 0.01}	{'n_estimators': 500, 'learning_rate': 0.01}	{'n_estimators': 500, 'learning_rate': 0.01}	{'n_estimators': 500, 'learning_rate': 0.01}	{'n_estimators': 500, 'learning_rate': 0.01}	{'n_estimators': 500, 'learning_rate': 0.01}
	XGBoost	1	1	{'subsample': 0.8, 'min_child_weight': 10, 'max_depth': 6, 'gamma': 0, 'colsample_bytree': 0.6}	{'subsample': 0.8, 'min_child_weight': 10, 'max_depth': 6, 'gamma': 0, 'colsample_bytree': 0.6}	{'subsample': 0.8, 'min_child_weight': 10, 'max_depth': 6, 'gamma': 0, 'colsample_bytree': 0.6}	{'subsample': 0.8, 'min_child_weight': 10, 'max_depth': 6, 'gamma': 0, 'colsample_bytree': 0.6}	{'subsample': 0.8, 'min_child_weight': 10, 'max_depth': 6, 'gamma': 0, 'colsample_bytree': 0.6}	{'subsample': 0.6, 'min_child_weight': 10, 'max_depth': 6, 'gamma': 0.5, 'colsample_bytree': 1.0}	{'subsample': 0.6, 'min_child_weight': 10, 'max_depth': 6, 'gamma': 0.5, 'colsample_bytree': 1.0}	{'subsample': 0.8, 'min_child_weight': 10, 'max_depth': 6, 'gamma': 0, 'colsample_bytree': 0.6}
	XGBoost	1	2	{'subsample': 0.8, 'min_child_weight': 10, 'max_depth': 6, 'gamma': 0, 'colsample_bytree': 0.6}	{'subsample': 0.8, 'min_child_weight': 10, 'max_depth': 6, 'gamma': 0, 'colsample_bytree': 0.6}	{'subsample': 0.8, 'min_child_weight': 10, 'max_depth': 6, 'gamma': 0, 'colsample_bytree': 0.6}	{'subsample': 0.8, 'min_child_weight': 10, 'max_depth': 6, 'gamma': 0, 'colsample_bytree': 0.6}	{'subsample': 0.8, 'min_child_weight': 10, 'max_depth': 6, 'gamma': 0, 'colsample_bytree': 0.6}	{'subsample': 0.8, 'min_child_weight': 10, 'max_depth': 6, 'gamma': 0, 'colsample_bytree': 0.6}	{'subsample': 0.6, 'min_child_weight': 10, 'max_depth': 6, 'gamma': 0.5, 'colsample_bytree': 1.0}	{'subsample': 0.8, 'min_child_weight': 10, 'max_depth': 6, 'gamma': 0, 'colsample_bytree': 0.6}
	XGBoost	2	1	{'subsample': 0.8, 'min_child_weight': 10, 'max_depth': 6, 'gamma': 0, 'colsample_bytree': 0.6}	{'subsample': 0.8, 'min_child_weight': 10, 'max_depth': 6, 'gamma': 0, 'colsample_bytree': 0.6}	{'subsample': 0.8, 'min_child_weight': 10, 'max_depth': 6, 'gamma': 0, 'colsample_bytree': 0.6}	{'subsample': 0.8, 'min_child_weight': 10, 'max_depth': 6, 'gamma': 0, 'colsample_bytree': 0.6}	{'subsample': 0.8, 'min_child_weight': 10, 'max_depth': 6, 'gamma': 0, 'colsample_bytree': 0.6}	{'subsample': 0.8, 'min_child_weight': 10, 'max_depth': 6, 'gamma': 0, 'colsample_bytree': 0.6}	{'subsample': 0.6, 'min_child_weight': 10, 'max_depth': 6, 'gamma': 0.5, 'colsample_bytree': 1.0}	{'subsample': 0.8, 'min_child_weight': 10, 'max_depth': 6, 'gamma': 0, 'colsample_bytree': 0.6}
	XGBoost	2	2	{'subsample': 0.8, 'min_child_weight': 10, 'max_depth': 6, 'gamma': 0, 'colsample_bytree': 0.6}	{'subsample': 0.8, 'min_child_weight': 10, 'max_depth': 6, 'gamma': 0, 'colsample_bytree': 0.6}	{'subsample': 0.8, 'min_child_weight': 10, 'max_depth': 6, 'gamma': 0, 'colsample_bytree': 0.6}	{'subsample': 0.8, 'min_child_weight': 10, 'max_depth': 6, 'gamma': 0, 'colsample_bytree': 0.6}	{'subsample': 0.6, 'min_child_weight': 10, 'max_depth': 6, 'gamma': 0.5, 'colsample_bytree': 1.0}	{'subsample': 0.8, 'min_child_weight': 10, 'max_depth': 6, 'gamma': 0, 'colsample_bytree': 0.6}	{'subsample': 0.6, 'min_child_weight': 10, 'max_depth': 6, 'gamma': 0.5, 'colsample_bytree': 1.0}	{'subsample': 0.8, 'min_child_weight': 10, 'max_depth': 6, 'gamma': 0, 'colsample_bytree': 0.6}
	XGBoost	3	1	{'subsample': 0.6, 'min_child_weight': 5, 'max_depth': 5, 'gamma': 0, 'colsample_bytree': 0.8}	{'subsample': 0.8, 'min_child_weight': 10, 'max_depth': 6, 'gamma': 0, 'colsample_bytree': 0.6}	{'subsample': 0.8, 'min_child_weight': 10, 'max_depth': 6, 'gamma': 0, 'colsample_bytree': 0.6}	{'subsample': 0.8, 'min_child_weight': 10, 'max_depth': 6, 'gamma': 0, 'colsample_bytree': 0.6}	{'subsample': 0.8, 'min_child_weight': 10, 'max_depth': 6, 'gamma': 0, 'colsample_bytree': 0.6}	{'subsample': 0.8, 'min_child_weight': 10, 'max_depth': 6, 'gamma': 0, 'colsample_bytree': 0.6}	{'subsample': 0.8, 'min_child_weight': 10, 'max_depth': 6, 'gamma': 0, 'colsample_bytree': 0.6}	{'subsample': 0.8, 'min_child_weight': 10, 'max_depth': 6, 'gamma': 0, 'colsample_bytree': 0.6}
	XGBoost	3	2	{'subsample': 0.6, 'min_child_weight': 10, 'max_depth': 6, 'gamma': 0.5, 'colsample_bytree': 1.0}	{'subsample': 0.6, 'min_child_weight': 10, 'max_depth': 6, 'gamma': 0.5, 'colsample_bytree': 1.0}	{'subsample': 0.8, 'min_child_weight': 10, 'max_depth': 6, 'gamma': 0, 'colsample_bytree': 0.6}	{'subsample': 0.8, 'min_child_weight': 10, 'max_depth': 6, 'gamma': 0, 'colsample_bytree': 0.6}	{'subsample': 0.8, 'min_child_weight': 10, 'max_depth': 6, 'gamma': 0, 'colsample_bytree': 0.6}	{'subsample': 0.8, 'min_child_weight': 10, 'max_depth': 6, 'gamma': 0, 'colsample_bytree': 0.6}	{'subsample': 0.8, 'min_child_weight': 10, 'max_depth': 6, 'gamma': 0, 'colsample_bytree': 0.6}	{'subsample': 0.8, 'min_child_weight': 10, 'max_depth': 6, 'gamma': 0, 'colsample_bytree': 0.6}
	XGBoost	4	1	{'subsample': 0.8, 'min_child_weight': 10, 'max_depth': 6, 'gamma': 0, 'colsample_bytree': 0.6}	{'subsample': 0.8, 'min_child_weight': 10, 'max_depth': 6, 'gamma': 0, 'colsample_bytree': 0.6}	{'subsample': 0.8, 'min_child_weight': 10, 'max_depth': 6, 'gamma': 0, 'colsample_bytree': 0.6}	{'subsample': 0.8, 'min_child_weight': 10, 'max_depth': 6, 'gamma': 0, 'colsample_bytree': 0.6}	{'subsample': 0.8, 'min_child_weight': 10, 'max_depth': 6, 'gamma': 0, 'colsample_bytree': 0.6}	{'subsample': 0.8, 'min_child_weight': 10, 'max_depth': 6, 'gamma': 0, 'colsample_bytree': 0.6}	{'subsample': 0.6, 'min_child_weight': 10, 'max_depth': 6, 'gamma': 0.5, 'colsample_bytree': 1.0}	{'subsample': 0.8, 'min_child_weight': 10, 'max_depth': 6, 'gamma': 0, 'colsample_bytree': 0.6}
	XGBoost	4	2	{'subsample': 0.6, 'min_child_weight': 5, 'max_depth': 5, 'gamma': 0, 'colsample_bytree': 0.8}	{'subsample': 0.8, 'min_child_weight': 10, 'max_depth': 6, 'gamma': 0, 'colsample_bytree': 0.6}	{'subsample': 0.8, 'min_child_weight': 10, 'max_depth': 6, 'gamma': 0, 'colsample_bytree': 0.6}	{'subsample': 0.8, 'min_child_weight': 10, 'max_depth': 6, 'gamma': 0, 'colsample_bytree': 0.6}	{'subsample': 0.8, 'min_child_weight': 10, 'max_depth': 6, 'gamma': 0, 'colsample_bytree': 0.6}	{'subsample': 0.8, 'min_child_weight': 10, 'max_depth': 6, 'gamma': 0, 'colsample_bytree': 0.6}	{'subsample': 0.6, 'min_child_weight': 10, 'max_depth': 6, 'gamma': 0.5, 'colsample_bytree': 1.0}	{'subsample': 0.8, 'min_child_weight': 10, 'max_depth': 6, 'gamma': 0, 'colsample_bytree': 0.6}
	XGBoost	5	1	{'subsample': 0.8, 'min_child_weight': 10, 'max_depth': 6, 'gamma': 0, 'colsample_bytree': 0.6}	{'subsample': 0.8, 'min_child_weight': 10, 'max_depth': 6, 'gamma': 0, 'colsample_bytree': 0.6}	{'subsample': 0.8, 'min_child_weight': 10, 'max_depth': 6, 'gamma': 0, 'colsample_bytree': 0.6}	{'subsample': 0.8, 'min_child_weight': 10, 'max_depth': 6, 'gamma': 0, 'colsample_bytree': 0.6}	{'subsample': 0.8, 'min_child_weight': 10, 'max_depth': 6, 'gamma': 0, 'colsample_bytree': 0.6}	{'subsample': 0.8, 'min_child_weight': 10, 'max_depth': 6, 'gamma': 0, 'colsample_bytree': 0.6}	{'subsample': 0.8, 'min_child_weight': 10, 'max_depth': 6, 'gamma': 0, 'colsample_bytree': 0.6}	{'subsample': 0.8, 'min_child_weight': 10, 'max_depth': 6, 'gamma': 0, 'colsample_bytree': 0.6}
	XGBoost	5	2	{'subsample': 0.8, 'min_child_weight': 10, 'max_depth': 6, 'gamma': 0, 'colsample_bytree': 0.6}	{'subsample': 0.8, 'min_child_weight': 10, 'max_depth': 6, 'gamma': 0, 'colsample_bytree': 0.6}	{'subsample': 0.8, 'min_child_weight': 10, 'max_depth': 6, 'gamma': 0, 'colsample_bytree': 0.6}	{'subsample': 0.8, 'min_child_weight': 10, 'max_depth': 6, 'gamma': 0, 'colsample_bytree': 0.6}	{'subsample': 0.8, 'min_child_weight': 10, 'max_depth': 6, 'gamma': 0, 'colsample_bytree': 0.6}	{'subsample': 0.8, 'min_child_weight': 10, 'max_depth': 6, 'gamma': 0, 'colsample_bytree': 0.6}	{'subsample': 0.6, 'min_child_weight': 10, 'max_depth': 6, 'gamma': 0.5, 'colsample_bytree': 1.0}	{'subsample': 0.8, 'min_child_weight': 10, 'max_depth': 6, 'gamma': 0, 'colsample_bytree': 0.6}
	RF	1	1	{'n_estimators': 3000}	{'n_estimators': 3000}	{'n_estimators': 3000}	{'n_estimators': 3000}	{'n_estimators': 1000}	{'n_estimators': 3000}	{'n_estimators': 500}	{'n_estimators': 3000}
	RF	1	2	{'n_estimators': 3000}	{'n_estimators': 3000}	{'n_estimators': 3000}	{'n_estimators': 3000}	{'n_estimators': 3000}	{'n_estimators': 3000}	{'n_estimators': 3000}	{'n_estimators': 3000}
	RF	2	1	{'n_estimators': 3000}	{'n_estimators': 3000}	{'n_estimators': 3000}	{'n_estimators': 3000}	{'n_estimators': 3000}	{'n_estimators': 3000}	{'n_estimators': 3000}	{'n_estimators': 3000}
	RF	2	2	{'n_estimators': 3000}	{'n_estimators': 3000}	{'n_estimators': 3000}	{'n_estimators': 3000}	{'n_estimators': 3000}	{'n_estimators': 3000}	{'n_estimators': 3000}	{'n_estimators': 3000}
	RF	3	1	{'n_estimators': 3000}	{'n_estimators': 1000}	{'n_estimators': 3000}	{'n_estimators': 3000}	{'n_estimators': 3000}	{'n_estimators': 3000}	{'n_estimators': 3000}	{'n_estimators': 3000}
	RF	3	2	{'n_estimators': 3000}	{'n_estimators': 3000}	{'n_estimators': 3000}	{'n_estimators': 3000}	{'n_estimators': 3000}	{'n_estimators': 3000}	{'n_estimators': 3000}	{'n_estimators': 3000}
	RF	4	1	{'n_estimators': 1000}	{'n_estimators': 3000}	{'n_estimators': 3000}	{'n_estimators': 3000}	{'n_estimators': 3000}	{'n_estimators': 3000}	{'n_estimators': 1000}	{'n_estimators': 3000}
	RF	4	2	{'n_estimators': 3000}	{'n_estimators': 3000}	{'n_estimators': 3000}	{'n_estimators': 3000}	{'n_estimators': 3000}	{'n_estimators': 3000}	{'n_estimators': 3000}	{'n_estimators': 3000}
	RF	5	1	{'n_estimators': 3000}	{'n_estimators': 3000}	{'n_estimators': 3000}	{'n_estimators': 3000}	{'n_estimators': 1000}	{'n_estimators': 3000}	{'n_estimators': 500}	{'n_estimators': 3000}
	RF	5	2	{'n_estimators': 3000}	{'n_estimators': 3000}	{'n_estimators': 3000}	{'n_estimators': 3000}	{'n_estimators': 3000}	{'n_estimators': 1000}	{'n_estimators': 500}	{'n_estimators': 3000}
	SVM	1	1	{'gamma': 0.01, 'C': 0.1}	{'gamma': 1.0, 'C': 10}	{'gamma': 0.01, 'C': 1}	{'gamma': 0.01, 'C': 1}	{'gamma': 0.01, 'C': 1}	{'gamma': 0.01, 'C': 1}	{'gamma': 0.01, 'C': 1}	{'gamma': 0.01, 'C': 1}
	SVM	1	2	{'gamma': 0.01, 'C': 1}	{'gamma': 1.0, 'C': 10}	{'gamma': 0.01, 'C': 1}	{'gamma': 0.01, 'C': 1}	{'gamma': 0.01, 'C': 1}	{'gamma': 0.01, 'C': 1}	{'gamma': 0.01, 'C': 1}	{'gamma': 0.01, 'C': 1}
	SVM	2	1	{'gamma': 0.01, 'C': 1}	{'gamma': 1.0, 'C': 10}	{'gamma': 0.01, 'C': 1}	{'gamma': 0.01, 'C': 1}	{'gamma': 0.01, 'C': 1}	{'gamma': 0.01, 'C': 1}	{'gamma': 0.01, 'C': 1}	{'gamma': 0.01, 'C': 1}
	SVM	2	2	{'gamma': 0.01, 'C': 1}	{'gamma': 1.0, 'C': 10}	{'gamma': 0.01, 'C': 1}	{'gamma': 0.01, 'C': 1}	{'gamma': 0.01, 'C': 1}	{'gamma': 0.01, 'C': 1}	{'gamma': 0.01, 'C': 1}	{'gamma': 0.01, 'C': 1}
	SVM	3	1	{'gamma': 0.01, 'C': 1}	{'gamma': 1.0, 'C': 10}	{'gamma': 0.01, 'C': 1}	{'gamma': 0.01, 'C': 1}	{'gamma': 0.01, 'C': 1}	{'gamma': 0.01, 'C': 1}	{'gamma': 0.01, 'C': 1}	{'gamma': 0.01, 'C': 1}
	SVM	3	2	{'gamma': 0.01, 'C': 0.1}	{'gamma': 1.0, 'C': 10}	{'gamma': 0.01, 'C': 1}	{'gamma': 0.01, 'C': 1}	{'gamma': 0.01, 'C': 1}	{'gamma': 0.01, 'C': 1}	{'gamma': 0.01, 'C': 1}	{'gamma': 0.01, 'C': 1}
	SVM	4	1	{'gamma': 0.01, 'C': 1}	{'gamma': 1.0, 'C': 10}	{'gamma': 0.01, 'C': 1}	{'gamma': 0.01, 'C': 1}	{'gamma': 0.01, 'C': 1}	{'gamma': 0.01, 'C': 1}	{'gamma': 0.01, 'C': 1}	{'gamma': 0.01, 'C': 1}
	SVM	4	2	{'gamma': 0.01, 'C': 0.1}	{'gamma': 1.0, 'C': 10}	{'gamma': 0.01, 'C': 1}	{'gamma': 0.01, 'C': 1}	{'gamma': 0.01, 'C': 1}	{'gamma': 0.01, 'C': 1}	{'gamma': 0.01, 'C': 1}	{'gamma': 0.01, 'C': 1}
	SVM	5	1	{'gamma': 0.01, 'C': 0.1}	{'gamma': 1.0, 'C': 10}	{'gamma': 0.01, 'C': 1}	{'gamma': 0.01, 'C': 1}	{'gamma': 0.01, 'C': 1}	{'gamma': 0.01, 'C': 1}	{'gamma': 0.01, 'C': 1}	{'gamma': 0.01, 'C': 1}
	SVM	5	2	{'gamma': 0.01, 'C': 1}	{'gamma': 1.0, 'C': 10}	{'gamma': 0.01, 'C': 1}	{'gamma': 0.01, 'C': 1}	{'gamma': 0.01, 'C': 1}	{'gamma': 0.01, 'C': 1}	{'gamma': 0.01, 'C': 1}	{'gamma': 0.01, 'C': 1}
	LDA	1	1
	LDA	1	2
	LDA	2	1
	LDA	2	2
	LDA	3	1
	LDA	3	2
	LDA	4	1
	LDA	4	2
	LDA	5	1
	LDA	5	2
	Lasso	1	1	{'C': 10}	{'C': 10}	{'C': 10}	{'C': 10}	{'C': 10}	{'C': 0.1}	{'C': 0.1}	{'C': 10}
	Lasso	1	2	{'C': 10}	{'C': 10}	{'C': 10}	{'C': 10}	{'C': 10}	{'C': 10}	{'C': 0.1}	{'C': 10}
	Lasso	2	1	{'C': 10}	{'C': 10}	{'C': 10}	{'C': 10}	{'C': 10}	{'C': 1}	{'C': 0.1}	{'C': 10}
	Lasso	2	2	{'C': 10}	{'C': 10}	{'C': 10}	{'C': 10}	{'C': 10}	{'C': 1}	{'C': 0.1}	{'C': 10}
	Lasso	3	1	{'C': 1}	{'C': 10}	{'C': 10}	{'C': 10}	{'C': 10}	{'C': 10}	{'C': 0.1}	{'C': 10}
	Lasso	3	2	{'C': 10}	{'C': 10}	{'C': 10}	{'C': 10}	{'C': 10}	{'C': 1}	{'C': 0.1}	{'C': 10}
	Lasso	4	1	{'C': 10}	{'C': 10}	{'C': 10}	{'C': 10}	{'C': 10}	{'C': 0.1}	{'C': 0.1}	{'C': 10}
	Lasso	4	2	{'C': 1}	{'C': 10}	{'C': 10}	{'C': 10}	{'C': 10}	{'C': 10}	{'C': 0.1}	{'C': 10}
	Lasso	5	1	{'C': 1}	{'C': 10}	{'C': 10}	{'C': 10}	{'C': 10}	{'C': 10}	{'C': 0.1}	{'C': 10}
	Lasso	5	2	{'C': 1}	{'C': 10}	{'C': 10}	{'C': 10}	{'C': 10}	{'C': 10}	{'C': 0.1}	{'C': 10}
	Ridge	1	1	{'C': 10}	{'C': 0.1}	{'C': 1}	{'C': 10}	{'C': 10}	{'C': 10}	{'C': 1}	{'C': 0.1}
	Ridge	1	2	{'C': 10}	{'C': 1}	{'C': 10}	{'C': 0.1}	{'C': 0.1}	{'C': 10}	{'C': 0.1}	{'C': 1}
	Ridge	2	1	{'C': 0.1}	{'C': 0.1}	{'C': 10}	{'C': 10}	{'C': 10}	{'C': 10}	{'C': 1}	{'C': 0.1}
	Ridge	2	2	{'C': 0.1}	{'C': 0.1}	{'C': 0.1}	{'C': 1}	{'C': 1}	{'C': 0.1}	{'C': 0.1}	{'C': 0.1}
	Ridge	3	1	{'C': 10}	{'C': 1}	{'C': 10}	{'C': 1}	{'C': 1}	{'C': 1}	{'C': 1}	{'C': 10}
	Ridge	3	2	{'C': 1}	{'C': 10}	{'C': 10}	{'C': 1}	{'C': 10}	{'C': 1}	{'C': 1}	{'C': 1}
	Ridge	4	1	{'C': 0.1}	{'C': 1}	{'C': 0.1}	{'C': 10}	{'C': 1}	{'C': 0.1}	{'C': 10}	{'C': 1}
	Ridge	4	2	{'C': 10}	{'C': 10}	{'C': 1}	{'C': 10}	{'C': 0.1}	{'C': 1}	{'C': 0.1}	{'C': 10}
	Ridge	5	1	{'C': 0.1}	{'C': 0.1}	{'C': 1}	{'C': 1}	{'C': 1}	{'C': 1}	{'C': 0.1}	{'C': 0.1}
	Ridge	5	2	{'C': 1}	{'C': 0.1}	{'C': 0.1}	{'C': 0.1}	{'C': 1}	{'C': 1}	{'C': 0.1}	{'C': 0.1}
	ElasticNet	1	1	{'C': 10}	{'C': 10}	{'C': 10}	{'C': 10}	{'C': 10}	{'C': 0.1}	{'C': 0.1}	{'C': 10}
	ElasticNet	1	2	{'C': 10}	{'C': 10}	{'C': 10}	{'C': 10}	{'C': 10}	{'C': 10}	{'C': 0.1}	{'C': 10}
	ElasticNet	2	1	{'C': 10}	{'C': 10}	{'C': 10}	{'C': 10}	{'C': 10}	{'C': 10}	{'C': 0.1}	{'C': 10}
	ElasticNet	2	2	{'C': 10}	{'C': 10}	{'C': 10}	{'C': 10}	{'C': 10}	{'C': 10}	{'C': 0.1}	{'C': 10}
	ElasticNet	3	1	{'C': 10}	{'C': 10}	{'C': 10}	{'C': 10}	{'C': 10}	{'C': 10}	{'C': 0.1}	{'C': 10}
	ElasticNet	3	2	{'C': 10}	{'C': 10}	{'C': 10}	{'C': 10}	{'C': 10}	{'C': 1}	{'C': 0.1}	{'C': 10}
	ElasticNet	4	1	{'C': 1}	{'C': 10}	{'C': 10}	{'C': 10}	{'C': 10}	{'C': 0.1}	{'C': 0.1}	{'C': 10}
	ElasticNet	4	2	{'C': 1}	{'C': 10}	{'C': 10}	{'C': 10}	{'C': 10}	{'C': 10}	{'C': 0.1}	{'C': 10}
	ElasticNet	5	1	{'C': 10}	{'C': 10}	{'C': 10}	{'C': 10}	{'C': 10}	{'C': 10}	{'C': 0.1}	{'C': 10}
	ElasticNet	5	2	{'C': 1}	{'C': 10}	{'C': 10}	{'C': 10}	{'C': 1}	{'C': 10}	{'C': 0.1}	{'C': 10}

## Sheet: 10. Letter_a
	Algorithm	Iteration	Fold	Without Sampling	O_Random	O_SMOTE	O_Border	U_Random	U_Condensed	U_NearMiss	SMOTETomek
	AdaBoost	1	1	{'n_estimators': 50, 'learning_rate': 1.0}	{'n_estimators': 50, 'learning_rate': 1.0}	{'n_estimators': 50, 'learning_rate': 1.0}	{'n_estimators': 50, 'learning_rate': 1.0}	{'n_estimators': 50, 'learning_rate': 1.0}	{'n_estimators': 50, 'learning_rate': 1.0}	{'n_estimators': 50, 'learning_rate': 1.0}	{'n_estimators': 50, 'learning_rate': 1.0}
	AdaBoost	1	2	{'n_estimators': 50, 'learning_rate': 1.0}	{'n_estimators': 50, 'learning_rate': 1.0}	{'n_estimators': 50, 'learning_rate': 1.0}	{'n_estimators': 50, 'learning_rate': 1.0}	{'n_estimators': 10, 'learning_rate': 1.0}	{'n_estimators': 500, 'learning_rate': 0.01}	{'n_estimators': 500, 'learning_rate': 0.01}	{'n_estimators': 50, 'learning_rate': 1.0}
	AdaBoost	2	1	{'n_estimators': 50, 'learning_rate': 1.0}	{'n_estimators': 50, 'learning_rate': 1.0}	{'n_estimators': 50, 'learning_rate': 1.0}	{'n_estimators': 50, 'learning_rate': 1.0}	{'n_estimators': 500, 'learning_rate': 0.01}	{'n_estimators': 500, 'learning_rate': 0.01}	{'n_estimators': 50, 'learning_rate': 1.0}	{'n_estimators': 50, 'learning_rate': 1.0}
	AdaBoost	2	2	{'n_estimators': 50, 'learning_rate': 1.0}	{'n_estimators': 50, 'learning_rate': 1.0}	{'n_estimators': 50, 'learning_rate': 1.0}	{'n_estimators': 50, 'learning_rate': 1.0}	{'n_estimators': 500, 'learning_rate': 0.01}	{'n_estimators': 50, 'learning_rate': 1.0}	{'n_estimators': 10, 'learning_rate': 1.0}	{'n_estimators': 50, 'learning_rate': 1.0}
	AdaBoost	3	1	{'n_estimators': 50, 'learning_rate': 1.0}	{'n_estimators': 50, 'learning_rate': 1.0}	{'n_estimators': 50, 'learning_rate': 1.0}	{'n_estimators': 50, 'learning_rate': 1.0}	{'n_estimators': 10, 'learning_rate': 1.0}	{'n_estimators': 10, 'learning_rate': 1.0}	{'n_estimators': 50, 'learning_rate': 1.0}	{'n_estimators': 50, 'learning_rate': 1.0}
	AdaBoost	3	2	{'n_estimators': 50, 'learning_rate': 1.0}	{'n_estimators': 50, 'learning_rate': 1.0}	{'n_estimators': 50, 'learning_rate': 1.0}	{'n_estimators': 50, 'learning_rate': 1.0}	{'n_estimators': 50, 'learning_rate': 1.0}	{'n_estimators': 500, 'learning_rate': 0.01}	{'n_estimators': 10, 'learning_rate': 1.0}	{'n_estimators': 50, 'learning_rate': 1.0}
	AdaBoost	4	1	{'n_estimators': 50, 'learning_rate': 1.0}	{'n_estimators': 50, 'learning_rate': 1.0}	{'n_estimators': 50, 'learning_rate': 1.0}	{'n_estimators': 50, 'learning_rate': 1.0}	{'n_estimators': 50, 'learning_rate': 1.0}	{'n_estimators': 50, 'learning_rate': 1.0}	{'n_estimators': 50, 'learning_rate': 1.0}	{'n_estimators': 50, 'learning_rate': 1.0}
	AdaBoost	4	2	{'n_estimators': 50, 'learning_rate': 1.0}	{'n_estimators': 50, 'learning_rate': 1.0}	{'n_estimators': 50, 'learning_rate': 1.0}	{'n_estimators': 50, 'learning_rate': 1.0}	{'n_estimators': 500, 'learning_rate': 0.01}	{'n_estimators': 50, 'learning_rate': 1.0}	{'n_estimators': 50, 'learning_rate': 1.0}	{'n_estimators': 50, 'learning_rate': 1.0}
	AdaBoost	5	1	{'n_estimators': 50, 'learning_rate': 1.0}	{'n_estimators': 50, 'learning_rate': 1.0}	{'n_estimators': 50, 'learning_rate': 1.0}	{'n_estimators': 50, 'learning_rate': 1.0}	{'n_estimators': 50, 'learning_rate': 1.0}	{'n_estimators': 10, 'learning_rate': 1.0}	{'n_estimators': 50, 'learning_rate': 1.0}	{'n_estimators': 50, 'learning_rate': 1.0}
	AdaBoost	5	2	{'n_estimators': 50, 'learning_rate': 1.0}	{'n_estimators': 50, 'learning_rate': 1.0}	{'n_estimators': 50, 'learning_rate': 1.0}	{'n_estimators': 50, 'learning_rate': 1.0}	{'n_estimators': 500, 'learning_rate': 0.01}	{'n_estimators': 500, 'learning_rate': 0.01}	{'n_estimators': 500, 'learning_rate': 0.01}	{'n_estimators': 50, 'learning_rate': 1.0}
	XGBoost	1	1	{'subsample': 1.0, 'min_child_weight': 1, 'max_depth': 6, 'gamma': 0, 'colsample_bytree': 1.0}	{'subsample': 1.0, 'min_child_weight': 1, 'max_depth': 6, 'gamma': 0, 'colsample_bytree': 1.0}	{'subsample': 1.0, 'min_child_weight': 1, 'max_depth': 6, 'gamma': 0, 'colsample_bytree': 1.0}	{'subsample': 1.0, 'min_child_weight': 1, 'max_depth': 6, 'gamma': 0, 'colsample_bytree': 1.0}	{'subsample': 1.0, 'min_child_weight': 1, 'max_depth': 6, 'gamma': 0, 'colsample_bytree': 1.0}	{'subsample': 1.0, 'min_child_weight': 1, 'max_depth': 6, 'gamma': 0, 'colsample_bytree': 1.0}	{'subsample': 1.0, 'min_child_weight': 1, 'max_depth': 6, 'gamma': 0, 'colsample_bytree': 1.0}	{'subsample': 1.0, 'min_child_weight': 1, 'max_depth': 6, 'gamma': 0, 'colsample_bytree': 1.0}
	XGBoost	1	2	{'subsample': 1.0, 'min_child_weight': 1, 'max_depth': 6, 'gamma': 0, 'colsample_bytree': 1.0}	{'subsample': 0.6, 'min_child_weight': 5, 'max_depth': 5, 'gamma': 0, 'colsample_bytree': 0.8}	{'subsample': 1.0, 'min_child_weight': 1, 'max_depth': 6, 'gamma': 0, 'colsample_bytree': 1.0}	{'subsample': 0.8, 'min_child_weight': 10, 'max_depth': 6, 'gamma': 0, 'colsample_bytree': 0.6}	{'subsample': 1.0, 'min_child_weight': 1, 'max_depth': 6, 'gamma': 0, 'colsample_bytree': 1.0}	{'subsample': 1.0, 'min_child_weight': 1, 'max_depth': 6, 'gamma': 0, 'colsample_bytree': 1.0}	{'subsample': 1.0, 'min_child_weight': 1, 'max_depth': 6, 'gamma': 0, 'colsample_bytree': 1.0}	{'subsample': 1.0, 'min_child_weight': 1, 'max_depth': 6, 'gamma': 0, 'colsample_bytree': 1.0}
	XGBoost	2	1	{'subsample': 1.0, 'min_child_weight': 1, 'max_depth': 6, 'gamma': 0, 'colsample_bytree': 1.0}	{'subsample': 0.6, 'min_child_weight': 5, 'max_depth': 5, 'gamma': 0, 'colsample_bytree': 0.8}	{'subsample': 1.0, 'min_child_weight': 1, 'max_depth': 6, 'gamma': 0, 'colsample_bytree': 1.0}	{'subsample': 0.6, 'min_child_weight': 10, 'max_depth': 6, 'gamma': 0.5, 'colsample_bytree': 1.0}	{'subsample': 1.0, 'min_child_weight': 1, 'max_depth': 6, 'gamma': 0, 'colsample_bytree': 1.0}	{'subsample': 1.0, 'min_child_weight': 1, 'max_depth': 6, 'gamma': 0, 'colsample_bytree': 1.0}	{'subsample': 1.0, 'min_child_weight': 1, 'max_depth': 6, 'gamma': 0, 'colsample_bytree': 1.0}	{'subsample': 1.0, 'min_child_weight': 1, 'max_depth': 6, 'gamma': 0, 'colsample_bytree': 1.0}
	XGBoost	2	2	{'subsample': 1.0, 'min_child_weight': 1, 'max_depth': 6, 'gamma': 0, 'colsample_bytree': 1.0}	{'subsample': 1.0, 'min_child_weight': 1, 'max_depth': 6, 'gamma': 0, 'colsample_bytree': 1.0}	{'subsample': 1.0, 'min_child_weight': 1, 'max_depth': 6, 'gamma': 0, 'colsample_bytree': 1.0}	{'subsample': 1.0, 'min_child_weight': 1, 'max_depth': 6, 'gamma': 0, 'colsample_bytree': 1.0}	{'subsample': 1.0, 'min_child_weight': 1, 'max_depth': 6, 'gamma': 0, 'colsample_bytree': 1.0}	{'subsample': 1.0, 'min_child_weight': 1, 'max_depth': 6, 'gamma': 0, 'colsample_bytree': 1.0}	{'subsample': 1.0, 'min_child_weight': 1, 'max_depth': 6, 'gamma': 0, 'colsample_bytree': 1.0}	{'subsample': 1.0, 'min_child_weight': 1, 'max_depth': 6, 'gamma': 0, 'colsample_bytree': 1.0}
	XGBoost	3	1	{'subsample': 1.0, 'min_child_weight': 1, 'max_depth': 6, 'gamma': 0, 'colsample_bytree': 1.0}	{'subsample': 1.0, 'min_child_weight': 1, 'max_depth': 6, 'gamma': 0, 'colsample_bytree': 1.0}	{'subsample': 0.6, 'min_child_weight': 5, 'max_depth': 5, 'gamma': 0, 'colsample_bytree': 0.8}	{'subsample': 0.8, 'min_child_weight': 10, 'max_depth': 6, 'gamma': 0, 'colsample_bytree': 0.6}	{'subsample': 1.0, 'min_child_weight': 1, 'max_depth': 6, 'gamma': 0, 'colsample_bytree': 1.0}	{'subsample': 1.0, 'min_child_weight': 1, 'max_depth': 6, 'gamma': 0, 'colsample_bytree': 1.0}	{'subsample': 1.0, 'min_child_weight': 1, 'max_depth': 6, 'gamma': 0, 'colsample_bytree': 1.0}	{'subsample': 0.6, 'min_child_weight': 5, 'max_depth': 5, 'gamma': 0, 'colsample_bytree': 0.8}
	XGBoost	3	2	{'subsample': 1.0, 'min_child_weight': 1, 'max_depth': 6, 'gamma': 0, 'colsample_bytree': 1.0}	{'subsample': 0.6, 'min_child_weight': 5, 'max_depth': 5, 'gamma': 0, 'colsample_bytree': 0.8}	{'subsample': 1.0, 'min_child_weight': 1, 'max_depth': 6, 'gamma': 0, 'colsample_bytree': 1.0}	{'subsample': 1.0, 'min_child_weight': 1, 'max_depth': 6, 'gamma': 0, 'colsample_bytree': 1.0}	{'subsample': 1.0, 'min_child_weight': 1, 'max_depth': 6, 'gamma': 0, 'colsample_bytree': 1.0}	{'subsample': 1.0, 'min_child_weight': 1, 'max_depth': 6, 'gamma': 0, 'colsample_bytree': 1.0}	{'subsample': 1.0, 'min_child_weight': 1, 'max_depth': 6, 'gamma': 0, 'colsample_bytree': 1.0}	{'subsample': 1.0, 'min_child_weight': 1, 'max_depth': 6, 'gamma': 0, 'colsample_bytree': 1.0}
	XGBoost	4	1	{'subsample': 1.0, 'min_child_weight': 1, 'max_depth': 6, 'gamma': 0, 'colsample_bytree': 1.0}	{'subsample': 0.6, 'min_child_weight': 5, 'max_depth': 5, 'gamma': 0, 'colsample_bytree': 0.8}	{'subsample': 0.6, 'min_child_weight': 5, 'max_depth': 5, 'gamma': 0, 'colsample_bytree': 0.8}	{'subsample': 1.0, 'min_child_weight': 1, 'max_depth': 6, 'gamma': 0, 'colsample_bytree': 1.0}	{'subsample': 1.0, 'min_child_weight': 1, 'max_depth': 6, 'gamma': 0, 'colsample_bytree': 1.0}	{'subsample': 1.0, 'min_child_weight': 1, 'max_depth': 6, 'gamma': 0, 'colsample_bytree': 1.0}	{'subsample': 1.0, 'min_child_weight': 1, 'max_depth': 6, 'gamma': 0, 'colsample_bytree': 1.0}	{'subsample': 0.6, 'min_child_weight': 5, 'max_depth': 5, 'gamma': 0, 'colsample_bytree': 0.8}
	XGBoost	4	2	{'subsample': 1.0, 'min_child_weight': 1, 'max_depth': 6, 'gamma': 0, 'colsample_bytree': 1.0}	{'subsample': 0.6, 'min_child_weight': 5, 'max_depth': 5, 'gamma': 0, 'colsample_bytree': 0.8}	{'subsample': 1.0, 'min_child_weight': 1, 'max_depth': 6, 'gamma': 0, 'colsample_bytree': 1.0}	{'subsample': 0.6, 'min_child_weight': 10, 'max_depth': 6, 'gamma': 0.5, 'colsample_bytree': 1.0}	{'subsample': 1.0, 'min_child_weight': 1, 'max_depth': 6, 'gamma': 0, 'colsample_bytree': 1.0}	{'subsample': 1.0, 'min_child_weight': 1, 'max_depth': 6, 'gamma': 0, 'colsample_bytree': 1.0}	{'subsample': 1.0, 'min_child_weight': 1, 'max_depth': 6, 'gamma': 0, 'colsample_bytree': 1.0}	{'subsample': 1.0, 'min_child_weight': 1, 'max_depth': 6, 'gamma': 0, 'colsample_bytree': 1.0}
	XGBoost	5	1	{'subsample': 1.0, 'min_child_weight': 1, 'max_depth': 6, 'gamma': 0, 'colsample_bytree': 1.0}	{'subsample': 1.0, 'min_child_weight': 1, 'max_depth': 6, 'gamma': 0, 'colsample_bytree': 1.0}	{'subsample': 1.0, 'min_child_weight': 1, 'max_depth': 6, 'gamma': 0, 'colsample_bytree': 1.0}	{'subsample': 0.8, 'min_child_weight': 10, 'max_depth': 6, 'gamma': 0, 'colsample_bytree': 0.6}	{'subsample': 1.0, 'min_child_weight': 1, 'max_depth': 6, 'gamma': 0, 'colsample_bytree': 1.0}	{'subsample': 1.0, 'min_child_weight': 1, 'max_depth': 6, 'gamma': 0, 'colsample_bytree': 1.0}	{'subsample': 1.0, 'min_child_weight': 1, 'max_depth': 6, 'gamma': 0, 'colsample_bytree': 1.0}	{'subsample': 1.0, 'min_child_weight': 1, 'max_depth': 6, 'gamma': 0, 'colsample_bytree': 1.0}
	XGBoost	5	2	{'subsample': 1.0, 'min_child_weight': 1, 'max_depth': 6, 'gamma': 0, 'colsample_bytree': 1.0}	{'subsample': 1.0, 'min_child_weight': 1, 'max_depth': 6, 'gamma': 0, 'colsample_bytree': 1.0}	{'subsample': 1.0, 'min_child_weight': 1, 'max_depth': 6, 'gamma': 0, 'colsample_bytree': 1.0}	{'subsample': 0.6, 'min_child_weight': 5, 'max_depth': 5, 'gamma': 0, 'colsample_bytree': 0.8}	{'subsample': 1.0, 'min_child_weight': 1, 'max_depth': 6, 'gamma': 0, 'colsample_bytree': 1.0}	{'subsample': 1.0, 'min_child_weight': 1, 'max_depth': 6, 'gamma': 0, 'colsample_bytree': 1.0}	{'subsample': 1.0, 'min_child_weight': 1, 'max_depth': 6, 'gamma': 0, 'colsample_bytree': 1.0}	{'subsample': 1.0, 'min_child_weight': 1, 'max_depth': 6, 'gamma': 0, 'colsample_bytree': 1.0}
	RF	1	1	{'n_estimators': 3000}	{'n_estimators': 100}	{'n_estimators': 500}	{'n_estimators': 3000}	{'n_estimators': 3000}	{'n_estimators': 3000}	{'n_estimators': 1000}	{'n_estimators': 500}
	RF	1	2	{'n_estimators': 3000}	{'n_estimators': 100}	{'n_estimators': 1000}	{'n_estimators': 100}	{'n_estimators': 3000}	{'n_estimators': 1000}	{'n_estimators': 500}	{'n_estimators': 1000}
	RF	2	1	{'n_estimators': 3000}	{'n_estimators': 100}	{'n_estimators': 500}	{'n_estimators': 3000}	{'n_estimators': 3000}	{'n_estimators': 1000}	{'n_estimators': 1000}	{'n_estimators': 500}
	RF	2	2	{'n_estimators': 1000}	{'n_estimators': 100}	{'n_estimators': 3000}	{'n_estimators': 3000}	{'n_estimators': 500}	{'n_estimators': 1000}	{'n_estimators': 500}	{'n_estimators': 3000}
	RF	3	1	{'n_estimators': 1000}	{'n_estimators': 100}	{'n_estimators': 500}	{'n_estimators': 500}	{'n_estimators': 3000}	{'n_estimators': 3000}	{'n_estimators': 3000}	{'n_estimators': 500}
	RF	3	2	{'n_estimators': 1000}	{'n_estimators': 100}	{'n_estimators': 3000}	{'n_estimators': 3000}	{'n_estimators': 3000}	{'n_estimators': 500}	{'n_estimators': 1000}	{'n_estimators': 3000}
	RF	4	1	{'n_estimators': 3000}	{'n_estimators': 100}	{'n_estimators': 3000}	{'n_estimators': 3000}	{'n_estimators': 3000}	{'n_estimators': 500}	{'n_estimators': 500}	{'n_estimators': 3000}
	RF	4	2	{'n_estimators': 3000}	{'n_estimators': 100}	{'n_estimators': 500}	{'n_estimators': 3000}	{'n_estimators': 3000}	{'n_estimators': 3000}	{'n_estimators': 3000}	{'n_estimators': 500}
	RF	5	1	{'n_estimators': 3000}	{'n_estimators': 100}	{'n_estimators': 3000}	{'n_estimators': 3000}	{'n_estimators': 3000}	{'n_estimators': 3000}	{'n_estimators': 500}	{'n_estimators': 3000}
	RF	5	2	{'n_estimators': 3000}	{'n_estimators': 100}	{'n_estimators': 3000}	{'n_estimators': 3000}	{'n_estimators': 3000}	{'n_estimators': 500}	{'n_estimators': 1000}	{'n_estimators': 3000}
	SVM	1	1	{'gamma': 1.0, 'C': 10}	{'gamma': 1.0, 'C': 10}	{'gamma': 1.0, 'C': 10}	{'gamma': 1.0, 'C': 10}	{'gamma': 1.0, 'C': 10}	{'gamma': 1.0, 'C': 10}	{'gamma': 1.0, 'C': 10}	{'gamma': 1.0, 'C': 10}
	SVM	1	2	{'gamma': 1.0, 'C': 10}	{'gamma': 1.0, 'C': 10}	{'gamma': 1.0, 'C': 10}	{'gamma': 1.0, 'C': 10}	{'gamma': 1.0, 'C': 10}	{'gamma': 1.0, 'C': 10}	{'gamma': 1.0, 'C': 10}	{'gamma': 1.0, 'C': 10}
	SVM	2	1	{'gamma': 1.0, 'C': 10}	{'gamma': 1.0, 'C': 10}	{'gamma': 1.0, 'C': 10}	{'gamma': 1.0, 'C': 10}	{'gamma': 1.0, 'C': 10}	{'gamma': 1.0, 'C': 10}	{'gamma': 1.0, 'C': 10}	{'gamma': 1.0, 'C': 10}
	SVM	2	2	{'gamma': 1.0, 'C': 10}	{'gamma': 1.0, 'C': 10}	{'gamma': 1.0, 'C': 10}	{'gamma': 1.0, 'C': 10}	{'gamma': 1.0, 'C': 10}	{'gamma': 1.0, 'C': 10}	{'gamma': 1.0, 'C': 10}	{'gamma': 1.0, 'C': 10}
	SVM	3	1	{'gamma': 1.0, 'C': 10}	{'gamma': 1.0, 'C': 10}	{'gamma': 1.0, 'C': 10}	{'gamma': 1.0, 'C': 10}	{'gamma': 1.0, 'C': 10}	{'gamma': 1.0, 'C': 10}	{'gamma': 1.0, 'C': 10}	{'gamma': 1.0, 'C': 10}
	SVM	3	2	{'gamma': 1.0, 'C': 10}	{'gamma': 1.0, 'C': 10}	{'gamma': 1.0, 'C': 10}	{'gamma': 1.0, 'C': 10}	{'gamma': 1.0, 'C': 10}	{'gamma': 1.0, 'C': 10}	{'gamma': 1.0, 'C': 10}	{'gamma': 1.0, 'C': 10}
	SVM	4	1	{'gamma': 1.0, 'C': 10}	{'gamma': 1.0, 'C': 10}	{'gamma': 1.0, 'C': 10}	{'gamma': 1.0, 'C': 10}	{'gamma': 1.0, 'C': 10}	{'gamma': 1.0, 'C': 10}	{'gamma': 1.0, 'C': 10}	{'gamma': 1.0, 'C': 10}
	SVM	4	2	{'gamma': 1.0, 'C': 10}	{'gamma': 1.0, 'C': 10}	{'gamma': 1.0, 'C': 10}	{'gamma': 1.0, 'C': 10}	{'gamma': 1.0, 'C': 10}	{'gamma': 1.0, 'C': 10}	{'gamma': 1.0, 'C': 10}	{'gamma': 1.0, 'C': 10}
	SVM	5	1	{'gamma': 1.0, 'C': 10}	{'gamma': 1.0, 'C': 10}	{'gamma': 1.0, 'C': 10}	{'gamma': 1.0, 'C': 10}	{'gamma': 1.0, 'C': 10}	{'gamma': 1.0, 'C': 10}	{'gamma': 1.0, 'C': 10}	{'gamma': 1.0, 'C': 10}
	SVM	5	2	{'gamma': 1.0, 'C': 10}	{'gamma': 1.0, 'C': 10}	{'gamma': 1.0, 'C': 10}	{'gamma': 1.0, 'C': 10}	{'gamma': 1.0, 'C': 10}	{'gamma': 1.0, 'C': 10}	{'gamma': 1.0, 'C': 10}	{'gamma': 1.0, 'C': 10}
	LDA	1	1
	LDA	1	2
	LDA	2	1
	LDA	2	2
	LDA	3	1
	LDA	3	2
	LDA	4	1
	LDA	4	2
	LDA	5	1
	LDA	5	2
	Lasso	1	1	{'C': 10}	{'C': 10}	{'C': 10}	{'C': 1}	{'C': 1}	{'C': 10}	{'C': 1}	{'C': 10}
	Lasso	1	2	{'C': 10}	{'C': 1}	{'C': 10}	{'C': 10}	{'C': 10}	{'C': 10}	{'C': 10}	{'C': 10}
	Lasso	2	1	{'C': 10}	{'C': 1}	{'C': 10}	{'C': 10}	{'C': 10}	{'C': 1}	{'C': 10}	{'C': 10}
	Lasso	2	2	{'C': 10}	{'C': 10}	{'C': 1}	{'C': 10}	{'C': 10}	{'C': 1}	{'C': 10}	{'C': 1}
	Lasso	3	1	{'C': 10}	{'C': 1}	{'C': 1}	{'C': 1}	{'C': 1}	{'C': 10}	{'C': 10}	{'C': 1}
	Lasso	3	2	{'C': 10}	{'C': 1}	{'C': 10}	{'C': 10}	{'C': 1}	{'C': 10}	{'C': 1}	{'C': 10}
	Lasso	4	1	{'C': 1}	{'C': 10}	{'C': 10}	{'C': 10}	{'C': 1}	{'C': 10}	{'C': 10}	{'C': 10}
	Lasso	4	2	{'C': 10}	{'C': 1}	{'C': 10}	{'C': 10}	{'C': 10}	{'C': 1}	{'C': 10}	{'C': 10}
	Lasso	5	1	{'C': 10}	{'C': 10}	{'C': 10}	{'C': 1}	{'C': 1}	{'C': 1}	{'C': 10}	{'C': 10}
	Lasso	5	2	{'C': 10}	{'C': 10}	{'C': 1}	{'C': 10}	{'C': 10}	{'C': 1}	{'C': 10}	{'C': 1}
	Ridge	1	1	{'C': 10}	{'C': 10}	{'C': 1}	{'C': 10}	{'C': 0.1}	{'C': 1}	{'C': 1}	{'C': 1}
	Ridge	1	2	{'C': 1}	{'C': 10}	{'C': 1}	{'C': 10}	{'C': 10}	{'C': 1}	{'C': 10}	{'C': 1}
	Ridge	2	1	{'C': 1}	{'C': 10}	{'C': 10}	{'C': 10}	{'C': 10}	{'C': 1}	{'C': 1}	{'C': 10}
	Ridge	2	2	{'C': 10}	{'C': 1}	{'C': 0.1}	{'C': 10}	{'C': 0.1}	{'C': 1}	{'C': 10}	{'C': 0.1}
	Ridge	3	1	{'C': 1}	{'C': 1}	{'C': 1}	{'C': 10}	{'C': 1}	{'C': 1}	{'C': 10}	{'C': 1}
	Ridge	3	2	{'C': 1}	{'C': 1}	{'C': 1}	{'C': 10}	{'C': 10}	{'C': 1}	{'C': 1}	{'C': 1}
	Ridge	4	1	{'C': 1}	{'C': 1}	{'C': 0.1}	{'C': 10}	{'C': 1}	{'C': 1}	{'C': 10}	{'C': 0.1}
	Ridge	4	2	{'C': 10}	{'C': 10}	{'C': 10}	{'C': 10}	{'C': 1}	{'C': 1}	{'C': 10}	{'C': 10}
	Ridge	5	1	{'C': 1}	{'C': 10}	{'C': 10}	{'C': 10}	{'C': 1}	{'C': 1}	{'C': 10}	{'C': 10}
	Ridge	5	2	{'C': 10}	{'C': 1}	{'C': 1}	{'C': 10}	{'C': 1}	{'C': 1}	{'C': 10}	{'C': 1}
	ElasticNet	1	1	{'C': 10}	{'C': 10}	{'C': 10}	{'C': 10}	{'C': 0.1}	{'C': 10}	{'C': 1}	{'C': 10}
	ElasticNet	1	2	{'C': 10}	{'C': 10}	{'C': 10}	{'C': 10}	{'C': 10}	{'C': 1}	{'C': 10}	{'C': 10}
	ElasticNet	2	1	{'C': 1}	{'C': 10}	{'C': 10}	{'C': 10}	{'C': 10}	{'C': 1}	{'C': 10}	{'C': 10}
	ElasticNet	2	2	{'C': 10}	{'C': 1}	{'C': 1}	{'C': 10}	{'C': 0.1}	{'C': 1}	{'C': 10}	{'C': 1}
	ElasticNet	3	1	{'C': 10}	{'C': 1}	{'C': 1}	{'C': 10}	{'C': 10}	{'C': 1}	{'C': 10}	{'C': 1}
	ElasticNet	3	2	{'C': 1}	{'C': 1}	{'C': 10}	{'C': 10}	{'C': 10}	{'C': 1}	{'C': 1}	{'C': 10}
	ElasticNet	4	1	{'C': 1}	{'C': 10}	{'C': 1}	{'C': 10}	{'C': 1}	{'C': 10}	{'C': 10}	{'C': 1}
	ElasticNet	4	2	{'C': 10}	{'C': 1}	{'C': 10}	{'C': 10}	{'C': 1}	{'C': 1}	{'C': 10}	{'C': 10}
	ElasticNet	5	1	{'C': 1}	{'C': 10}	{'C': 10}	{'C': 10}	{'C': 1}	{'C': 1}	{'C': 10}	{'C': 10}
	ElasticNet	5	2	{'C': 10}	{'C': 10}	{'C': 1}	{'C': 10}	{'C': 10}	{'C': 1}	{'C': 10}	{'C': 1}

[truncated: 21 more sheets: 11. Abalone9vs18, 12. Glass5, 13. Balance_B, 14. Pendigit9, 15. Pageblocks1, 16. Ecoli_imU, 17. Segment_G, 18. Ecoli_pp, 19. Ecoli_im, 20. Vehicle_VAN, 21. Parkinsons_H, 22. Vehicle_Bus, 23. Haberman_Died, 24. Wine3, 25. German_Bad, 26. Glass1, 27. Iris_Setosa, 28. Ionosphere_Bad, 29. Spambase0, 30. Heart_H …]
